# Supplementary material
Source: PubMed Central journal article supplement (PMC3855091)
Supplement: mmc1.pdf [file mmc1.pdf]

**Supplementary Information**

**Bile acid-induced inflammatory signaling in Foxa2-deficient mice  
leads to activation of mTOR and age-onset obesity.**

**Irina M. Bochkis, Soona Shin, Klaus H. Kaestner**

## Supplementary Data

**Supplementary Figure 1, Related to Figure 4.** ANCOVA regression analysis of energy expenditure parameters in old *Foxa2* mutant mice. (A) Logistic regression analysis of  $\text{VO}_2$  consumption and (B)  $\text{CO}_2$  production shows that the changes are dependent on the genotype adjusted for body weight (ANCOVA  $p < 0.001$  for both). (C) Changes in heat production adjusted for body weight were not statistically significant (ANCOVA,  $p < 0.15$ ).

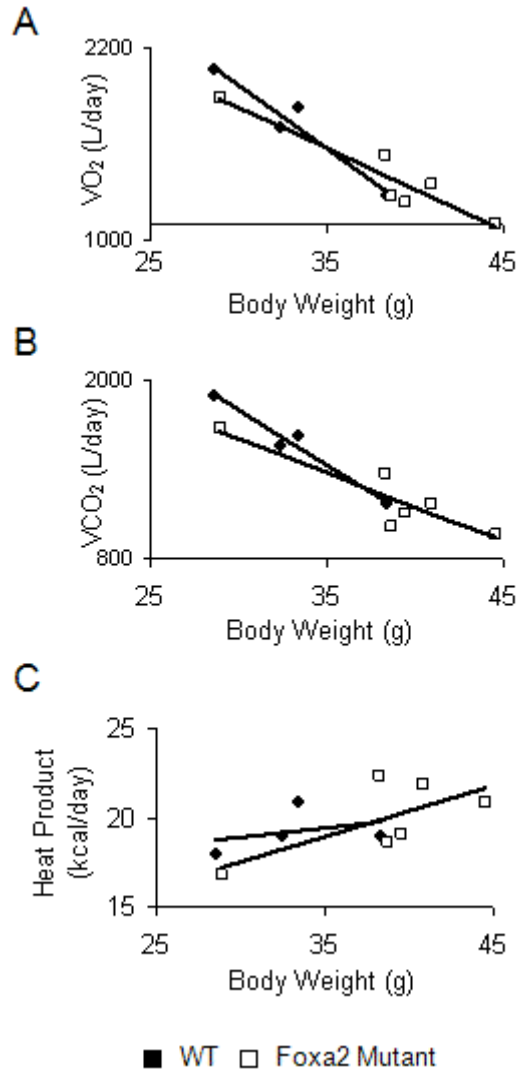

**Supplementary Table 1, Related to Figure 1.** Transcription factor targets from inflammatory network. Lists of Stat3, Nf-kb, and Irf3 targets, as well as genes co-regulated by two or more of these factors (with fold changes in young *Foxa2* mutants) determined by Ingenuity Pathway Analysis.

| <b>Gene Name</b> | <b>Fold Change</b> | <b>Co-regulators</b> |
|------------------|--------------------|----------------------|
| BCL2             | 1.40               | Stat3, Nf-kb         |
| CCL5             | 1.54               | Nf-kb, Irf3          |
| CXCL10           | 1.60               | Stat3, Nf-kb, Irf3   |
| CCND1            | 2.84               | Stat3, Nf-kb         |
| CXCL2            | 1.74               | Stat3, Nf-kb         |
| EGR1             | 2.70               | Stat3, Nf-kb         |
| GBP2             | 1.33               | Stat3, Nf-kb         |
| ICAM1            | 1.67               | Stat3, Nf-kb         |
| IFIT1B           | 1.90               | Stat3, Irf3          |
| IRF1             | 1.33               | Stat3, Nf-kb         |
| JUNB             | 1.79               | Stat3, Nf-kb         |
| MMP2             | 1.31               | Stat3, Nf-kb         |
| MMP3             | 2.74               | Nf-kb, Irf3          |
| RSAD2            | 1.85               | Nf-kb, Irf3          |
| SOCS3            | 1.39               | Stat3, Nf-kb         |

**Supplementary Table 2, Related to Figure 2.** A list of genes differentially expressed in both Foxa2 and Stat5b liver-specific mutants used to generate the heatmap in Figure 2A.

| <b>Gene Symbol</b> | <b>Fold Change in Foxa2 mutants</b> | <b>Fold Change in Stat5b mutants</b> |
|--------------------|-------------------------------------|--------------------------------------|
| 2310040A07Rik      | -9.71                               | -2.26                                |
| Asns               | -9.62                               | -1.88                                |
| Hsd3b4             | -8.85                               | -6.69                                |
| Hsd3b5             | -6.25                               | -27.59                               |
| Elovl3             | -4.08                               | -3.9                                 |
| Aox3               | -3.66                               | -5.21                                |
| Ces1               | -3.27                               | -1.77                                |
| C6                 | -2.83                               | -1.67                                |
| Serpina9           | -2.63                               | -7.37                                |
| 2310031A18Rik      | -2.58                               | 1.51                                 |
| Dpy19l3            | -2.57                               | -1.96                                |
| Bmf                | -2.45                               | -5.63                                |
| Aox1               | -2.27                               | -1.37                                |
| F11                | -2.26                               | -2.04                                |
| Ccl9               | -2.18                               | 2.27                                 |
| Alas2              | -2.11                               | -3.53                                |
| Ghr                | -1.95                               | -1.5                                 |
| Ugdh               | -1.92                               | -1.38                                |
| Susd4              | -1.89                               | -8.78                                |
| Meig1              | -1.86                               | -2.79                                |
| Aqp8               | -1.8                                | 1.83                                 |
| Gstm6              | -1.75                               | -1.58                                |
| Sdf2l1             | -1.75                               | -1.69                                |
| Ces2               | -1.75                               | -2.32                                |
| Clec2h             | -1.74                               | -2.75                                |
| Mtnr1a             | -1.74                               | -1.33                                |
| Aatk               | -1.7                                | -3.39                                |
| Hsd3b2             | -1.69                               | -3.08                                |
| Abcc4              | -1.68                               | 2.38                                 |
| Sucnr1             | -1.66                               | -3.74                                |
| Ugt2b35            | -1.65                               | -1.83                                |
| Fkbp11             | -1.65                               | -2.26                                |
| Tpst1              | -1.63                               | -1.6                                 |
| Pfn2               | -1.62                               | -1.67                                |
| Abcg2              | -1.61                               | -2.2                                 |
| Hao1               | -1.6                                | -1.67                                |
| Omd                | -1.58                               | -3.67                                |
| Gsta4              | -1.58                               | -4.88                                |
| Odz3               | -1.56                               | 2.18                                 |
| 2010305C02Rik      | -1.55                               | 1.32                                 |
| Dscr1l1            | -1.55                               | 1.71                                 |
| Tspan33            | -1.55                               | -2.06                                |
| Adh4               | -1.54                               | -1.35                                |

|               |       |        |
|---------------|-------|--------|
| Slc1a4        | -1.53 | 1.52   |
| Rnf125        | -1.52 | 1.57   |
| C730048C13Rik | -1.51 | -2.13  |
| Col27a1       | -1.51 | -2.44  |
| Agxt2l1       | -1.5  | -1.81  |
| Lama3         | -1.49 | -4.65  |
| Bmp7          | -1.48 | -1.38  |
| Ugt2b38       | -1.48 | -8.89  |
| Anubl1        | -1.47 | -1.57  |
| Ugt2b1        | -1.46 | -1.76  |
| Slco1a4       | -1.45 | 5.05   |
| Gldc          | -1.44 | 1.68   |
| 1700007B13Rik | -1.44 | -2.34  |
| Mmd2          | -1.43 | 2.26   |
| Lactb2        | -1.41 | -1.68  |
| 2810439F02Rik | -1.41 | -2.77  |
| Ugt2b37       | -1.4  | -2.37  |
| Rgs12         | -1.39 | -2.62  |
| Ugt2b5        | -1.39 | -2.63  |
| Sort1         | -1.39 | -2.77  |
| Slc35d1       | -1.39 | -1.45  |
| Cyp4a12b      | -1.38 | -6.09  |
| Scamp1        | -1.38 | -1.49  |
| Serpina3a     | -1.38 | -2.61  |
| Afp           | -1.38 | -1.35  |
| Clpx          | -1.37 | 2.09   |
| Klhdc7a       | -1.37 | -1.68  |
| Keg1          | -1.36 | -4.9   |
| Dnase2a       | -1.36 | -3.82  |
| Prlr          | -1.36 | 1.84   |
| Fbxo21        | -1.35 | -1.39  |
| Uck1          | -1.34 | 1.35   |
| 1810054D07Rik | -1.34 | -1.31  |
| Slco1a1       | -1.33 | -13.32 |
| Nhlrc1        | -1.32 | -1.96  |
| Tbcel         | -1.31 | -2.2   |
| AW544981      | -1.31 | 1.87   |
| Il2rb         | 1.3   | -1.57  |
| Mup3          | 1.3   | -3.03  |
| Psmb10        | 1.3   | 1.67   |
| Gpr56         | 1.3   | 1.65   |
| Klhl13        | 1.31  | 1.64   |
| Rbp1          | 1.31  | 1.58   |
| Isg15         | 1.32  | 1.57   |
| Ggt6          | 1.32  | 1.84   |
| Ubt2          | 1.32  | 1.65   |
| As3mt         | 1.32  | 1.6    |
| Tgfbr2        | 1.32  | 2.26   |
| Fgd5          | 1.33  | -2.71  |
| Plscr2        | 1.33  | 1.76   |
| Plekha4       | 1.33  | 1.33   |

|               |      |       |
|---------------|------|-------|
| Gbp2          | 1.33 | 3.71  |
| Fbxo10        | 1.34 | 1.53  |
| Slc25a27      | 1.34 | 1.59  |
| Mfge8         | 1.35 | 1.57  |
| Map3k1        | 1.35 | 1.6   |
| 1700112E06Rik | 1.35 | 1.88  |
| Insl6         | 1.35 | 2.75  |
| 9030611O19Rik | 1.35 | 1.42  |
| Tmem159       | 1.35 | 1.58  |
| S100a10       | 1.37 | 1.62  |
| Dhrs7         | 1.37 | 2.15  |
| Thrb          | 1.37 | -1.78 |
| Ckap4         | 1.38 | -1.92 |
| Csrp3         | 1.38 | 1.53  |
| C330008K14Rik | 1.38 | 1.73  |
| Slc39a14      | 1.38 | 1.52  |
| Mtmr11        | 1.39 | 2.73  |
| Ifit3         | 1.39 | 1.45  |
| Sdc1          | 1.39 | 1.46  |
| Wipf1         | 1.4  | 1.6   |
| Papss2        | 1.41 | 2.48  |
| Reln          | 1.42 | -1.34 |
| Pmm1          | 1.43 | 2.51  |
| 4931408A02Rik | 1.43 | 1.52  |
| Slc22a5       | 1.43 | 1.94  |
| Lysmd2        | 1.43 | 1.53  |
| Ppp1r9a       | 1.44 | 4.47  |
| Fhod3         | 1.45 | 1.59  |
| Jam3          | 1.46 | -1.64 |
| Anxa2         | 1.46 | 1.34  |
| 2010002N04Rik | 1.46 | 1.56  |
| Saa2          | 1.47 | 3.22  |
| D430019H16Rik | 1.47 | -1.51 |
| Ier5          | 1.47 | 1.68  |
| Irf5          | 1.48 | -2.9  |
| Card10        | 1.48 | 1.62  |
| Fmo2          | 1.48 | 2.48  |
| Itpr3         | 1.48 | 1.33  |
| Slc41a2       | 1.49 | 1.74  |
| Birc5         | 1.49 | 1.65  |
| Stk39         | 1.49 | 2.03  |
| Slc5a6        | 1.49 | 1.69  |
| 2810043G22Rik | 1.49 | 1.89  |
| Cbfa2t3h      | 1.51 | 1.42  |
| 1700055N04Rik | 1.51 | 5.37  |
| Tacc2         | 1.51 | 2.38  |
| Lgals6        | 1.53 | 1.68  |
| Ccl5          | 1.54 | -1.4  |
| Pigr          | 1.54 | 1.85  |
| Saa1          | 1.56 | 14.21 |
| 4631416L12Rik | 1.56 | 1.51  |

|               |      |       |
|---------------|------|-------|
| Farp1         | 1.57 | -1.57 |
| AA986860      | 1.58 | -1.42 |
| Klf6          | 1.58 | 2.14  |
| Nab2          | 1.61 | 1.71  |
| Ppp1r14a      | 1.62 | -1.98 |
| Mical1        | 1.62 | -1.51 |
| Glis2         | 1.63 | -1.52 |
| Crym          | 1.63 | 1.6   |
| Slc17a1       | 1.64 | 2.36  |
| Lpin1         | 1.65 | -2.39 |
| Por           | 1.65 | 1.4   |
| Ppargc1a      | 1.65 | 1.62  |
| Icosl         | 1.66 | 1.36  |
| Serpinh1      | 1.69 | 1.37  |
| Usp18         | 1.7  | 2.04  |
| Vwf           | 1.71 | 1.35  |
| Slc25a22      | 1.71 | 1.51  |
| Sdpr          | 1.75 | 1.72  |
| Mmp14         | 1.77 | 1.73  |
| Btg2          | 1.78 | 1.79  |
| Fmo3          | 1.78 | 61.99 |
| Evc           | 1.78 | 1.53  |
| 2310076L09Rik | 1.79 | 1.56  |
| Ak7           | 1.79 | -1.92 |
| Ly6e          | 1.8  | 1.54  |
| Igfbp1        | 1.81 | 4.17  |
| Celsr1        | 1.82 | 1.98  |
| Acot3         | 1.82 | 7.88  |
| Rsad2         | 1.85 | 1.5   |
| Fndc1         | 1.85 | -1.96 |
| Ctse          | 1.89 | 2.16  |
| Ifit1         | 1.9  | 1.64  |
| Gypc          | 1.91 | 2.29  |
| Col1a1        | 1.92 | 1.46  |
| Lass6         | 2    | 1.63  |
| Nfkbiz        | 2.02 | 1.69  |
| 2210021J22Rik | 2.02 | 1.53  |
| 6430514L14Rik | 2.04 | 1.7   |
| Ptp4a1        | 2.05 | 1.56  |
| Defb1         | 2.09 | 4.31  |
| Tff1          | 2.1  | 1.73  |
| Dll1          | 2.11 | 2.07  |
| Il1r1         | 2.11 | 1.71  |
| Nrp2          | 2.14 | 1.81  |
| Gbp3          | 2.14 | 3.39  |
| Sparcl1       | 2.15 | 2.01  |
| Htra3         | 2.18 | 1.68  |
| Cyp2a12       | 2.21 | 20.68 |
| Sult1d1       | 2.22 | 2.21  |
| Pcp4l1        | 2.22 | 1.53  |
| Cyp2c38       | 2.29 | 1.9   |

|               |      |        |
|---------------|------|--------|
| Sult1a1       | 2.36 | 2.89   |
| Pdk4          | 2.38 | 3.28   |
| Tox           | 2.42 | 3.32   |
| Cidec         | 2.46 | 1.7    |
| BC089597      | 2.47 | 2.73   |
| Lcn2          | 2.47 | 3.38   |
| Slc10a2       | 2.48 | -1.4   |
| Wfdc2         | 2.49 | 1.66   |
| Il1rn         | 2.57 | 1.64   |
| Plxnb1        | 2.61 | 1.86   |
| Gstt3         | 2.63 | 4.81   |
| Vldlr         | 2.67 | 4.57   |
| Cml4          | 2.69 | -6.88  |
| Egr1          | 2.7  | 1.87   |
| Abcd2         | 2.79 | 12.79  |
| Ccnd1         | 2.84 | 3.15   |
| Dmbt1         | 2.87 | 2.4    |
| Apoa4         | 2.88 | 2.21   |
| G0s2          | 2.97 | 4.05   |
| Cyp2b10       | 3.04 | 4.08   |
| S3-12         | 3.08 | 2.3    |
| Dct           | 3.13 | -15.98 |
| C730036D15Rik | 3.24 | 7.46   |
| Cyp39a1       | 3.25 | 7.29   |
| Mt1           | 3.45 | 4.02   |
| Cyp2b13       | 3.51 | 79.62  |
| Cyp2b13       | 3.51 | 2.19   |
| Cyp2b9        | 3.63 | 58.77  |
| Krt23         | 3.81 | 4.28   |
| Ppl           | 3.94 | 3.76   |
| Nnmt          | 4.16 | 7.89   |
| BC014805      | 5.07 | 41.85  |
| Mt2           | 5.2  | 18.08  |



**Supplementary Table 3, Related to Figure 5.** Biochemical pathways overrepresented in *Foxa2* targets in 10-12 month-old livers. The DAVID 6.7 suite of software and Ingenuity Pathway Analysis were used to determine enriched biological functional categories in the set of differentially expressed genes in Table S1. A collection of pathways regulated by TOR signaling, including “Cellular Growth”, “Ribosome Biogenesis” and “Protein Synthesis/Translation” were upregulated in livers of aged *Foxa2* mutant mice.

| Molecular Function            | p -value |
|-------------------------------|----------|
| Cellular Growth               | 7.3e-4   |
| Cellular Morphology           | 1.1e-4   |
| Ribosome Biogenesis           | 6.5e-8   |
| Protein Synthesis/Translation | 5.4e-3   |

| Biological Pathway    | p -value |
|-----------------------|----------|
| Inflammatory Response | 8.6e-4   |
| Lipid Metabolism      | 7.2e-5   |
| Protein Folding       | 4.5e-4   |
| Xenobiotic Metabolism | 6.6e-7   |

**Supplementary Table 4, Related to Figure 5.** Gene expression profile in livers of 10-12 month old *Foxa2*<sup>loxP/loxP</sup>*Alfp.Cre* mice. Four sets of biological replicates were used in each direct comparison experiment and hybridized to Agilent 4x44k Whole Mouse Genome Oligo Microarray. Statistical analysis of the microarray data was performed using the significance of microarrays (SAM) package with a false discovery rate (FDR) of 10% and |Fold Change| >=1.5.

**Gene expression profile of Foxa2loxP/loxPALfp.Cre mice (10-12 months old)**  
**FDR=10% and |FC| >=1.5**

| ProbeName     | GeneName           | TranscriptID       | Description                                                                    | FC       | AbsFC   | FDR  |
|---------------|--------------------|--------------------|--------------------------------------------------------------------------------|----------|---------|------|
| A_51_P222773  | Foxa2              | NM_010446          | forkhead box A2                                                                | -200     | 200     | 0    |
| A_51_P222773  | Foxa2              | NM_010446          | forkhead box A2                                                                | -166.667 | 166.667 | 0    |
| A_51_P222773  | Foxa2              | NM_010446          | forkhead box A2                                                                | -166.667 | 166.667 | 0    |
| A_51_P222773  | Foxa2              | NM_010446          | forkhead box A2                                                                | -166.667 | 166.667 | 0    |
| A_51_P222773  | Foxa2              | NM_010446          | forkhead box A2                                                                | -166.667 | 166.667 | 0    |
| A_51_P222773  | Foxa2              | NM_010446          | forkhead box A2                                                                | -166.667 | 166.667 | 0    |
| A_51_P222773  | Foxa2              | NM_010446          | forkhead box A2                                                                | -166.667 | 166.667 | 0    |
| A_51_P222773  | Foxa2              | NM_010446          | forkhead box A2                                                                | -166.667 | 166.667 | 0    |
| A_51_P222773  | Foxa2              | NM_010446          | forkhead box A2                                                                | -142.857 | 142.857 | 0    |
| A_51_P222773  | Foxa2              | NM_010446          | forkhead box A2                                                                | -142.857 | 142.857 | 0    |
| A_51_P352005  | Hsd3b4             | NM_008294          | hydroxy-delta-5-steroid dehydrogenase, 3 beta- and steroid delta-isomerase 4   | -22.727  | 22.727  | 0    |
| A_51_P125745  | Asns               | NM_012055          | asparagine synthetase                                                          | -20.833  | 20.833  | 0    |
| A_51_P497090  | Enho               | NM_027147          | RIKEN cDNA 2310040A07 gene                                                     | -20.408  | 20.408  | 0    |
| A_52_P192265  | Ren2               | NM_031193          | renin 2 tandem duplication of Ren1                                             | -13.699  | 13.699  | 0    |
| A_51_P496162  | Hsd3b5             | NM_008295          | hydroxy-delta-5-steroid dehydrogenase, 3 beta- and steroid delta-isomerase 5   | -13.333  | 13.333  | 0    |
| A_51_P316661  | Ren1               | NM_031192          | renin 1 structural                                                             | -10.526  | 10.526  | 0    |
| A_52_P414464  | Rcan2              | NM_207649          | Down syndrome critical region gene 1-like 1                                    | -9.901   | 9.901   | 0    |
| A_51_P324633  | Elov13             | NM_007703          | elongation of very long chain fatty acids (FEN1/Elo2, SUR4/Elo3, yeast)-like 3 | -9.524   | 9.524   | 0    |
| A_51_P361448  | Scara5             | NM_028903          | scavenger receptor class A, member 5 (putative)                                | -6.452   | 6.452   | 0    |
| A_51_P441798  | Glul               | X16314             | glutamate-ammonia ligase (glutamine synthetase)                                | -6.329   | 6.329   | 0    |
| A_51_P137452  | Cyp2g1             | NM_013809          | cytochrome P450, family 2, subfamily g, polypeptide 1                          | -6.024   | 6.024   | 0    |
| A_51_P329370  | Snmp25             | NM_030093          | RIKEN cDNA 3300001G02 gene                                                     | -5.319   | 5.319   | 2.27 |
| A_52_P471259  | Snmp25             | NM_030093          | RIKEN cDNA 3300001G02 gene                                                     | -5.319   | 5.319   | 3.45 |
| A_51_P502119  | F11                | NM_028066          | coagulation factor XI                                                          | -5.155   | 5.155   | 0    |
| A_51_P284486  | Gstm2              | NM_008183          | glutathione S-transferase, mu 2                                                | -5       | 5       | 0    |
| A_52_P237102  | Dpy19l3            | NM_178704          | dpy-19-like 3 (C. elegans)                                                     | -4.95    | 4.95    | 0    |
| A_51_P516085  | Dntt               | NM_009345          | deoxynucleotidyltransferase, terminal                                          | -4.878   | 4.878   | 0    |
| A_51_P239236  | Acacb              | NM_133904          | acetyl-Coenzyme A carboxylase beta                                             | -4.785   | 4.785   | 2.27 |
| A_51_P305138  | A_51_P305138       | A_51_P305138       |                                                                                | -4.739   | 4.739   | 0    |
| A_51_P370700  | Got1               | NM_010324          | glutamate oxaloacetate transaminase 1, soluble                                 | -4.739   | 4.739   | 0    |
| A_52_P246252  | Cyp2a5             | NM_007812          | cytochrome P450, family 2, subfamily a, polypeptide 5                          | -4.484   | 4.484   | 4.2  |
| A_52_P458682  | Gsta2              | NM_008182          | glutathione S-transferase, alpha 2 (Yc2)                                       | -4.484   | 4.484   | 0    |
| A_52_P531610  | Agxt2l1            | AK030395           | alanine-glyoxylate aminotransferase 2-like 1                                   | -4.405   | 4.405   | 9.3  |
| A_52_P99807   | Dpy19l3            | NM_178704          | dpy-19-like 3 (C. elegans)                                                     | -4.098   | 4.098   | 2.27 |
| A_51_P377154  | Cyp2a4             | NM_009997          | cytochrome P450, family 2, subfamily a, polypeptide 4                          | -4.049   | 4.049   | 3.43 |
| A_51_P397783  | ENSMUST00000036503 | ENSMUST00000036503 | AN1, ubiquitin-like, homolog (Xenopus laevis)                                  | -4.032   | 4.032   | 1.29 |
| A_51_P391616  | Agxt2l1            | NM_027907          | alanine-glyoxylate aminotransferase 2-like 1                                   | -4       | 4       | 0    |
| A_52_P246255  | Cyp2a4             | NM_009997          | cytochrome P450, family 2, subfamily a, polypeptide 5                          | -3.984   | 3.984   | 3.45 |
| A_51_P238576  | Cyp4a14            | NM_007822          | cytochrome P450, family 4, subfamily a, polypeptide 14                         | -3.953   | 3.953   | 6.58 |
| A_52_P1092823 | Irx1               | NM_010573          | Iroquois related homeobox 1 (Drosophila)                                       | -3.831   | 3.831   | 0    |
| A_52_P981179  | A_52_P981179       | A_52_P981179       |                                                                                | -3.817   | 3.817   | 0    |
| A_51_P359586  | Pfkfb1             | NM_008824          | 6-phosphofructo-2-kinase/fructose-2,6-biphosphatase 1                          | -3.731   | 3.731   | 1.29 |
| A_52_P245962  | Ces1               | NM_021456          | carboxylesterase 1                                                             | -3.731   | 3.731   | 2.27 |

|              |               |              |                                                                          |        |       |      |
|--------------|---------------|--------------|--------------------------------------------------------------------------|--------|-------|------|
| A_51_P451574 | Acot1         | NM_012006    | acyl-CoA thioesterase 1                                                  | -3.717 | 3.717 | 9.3  |
| A_52_P251623 | BC057022      | NM_001004180 | cDNA sequence BC057022                                                   | -3.623 | 3.623 | 0    |
| A_52_P661412 | Adora1        | NM_001008533 | adenosine A1 receptor                                                    | -3.521 | 3.521 | 0    |
| A_51_P462708 | Wfdc15b       | NM_138685    | WAP four-disulfide core domain 15B                                       | -3.509 | 3.509 | 0    |
| A_51_P253481 | Ces1          | NM_021456    | carboxylesterase 1                                                       | -3.413 | 3.413 | 2.27 |
| A_52_P172272 | Adora1        | NM_001008533 | adenosine A1 receptor                                                    | -3.344 | 3.344 | 0    |
| A_51_P238183 | Etnk2         | NM_175443    | ethanolamine kinase 2                                                    | -3.205 | 3.205 | 0    |
| A_51_P520718 | Ptger3        | NM_011196    | prostaglandin E receptor 3 (subtype EP3)                                 | -3.175 | 3.175 | 3.45 |
| A_51_P267933 | Snhg11        | NM_175692    | RIKEN cDNA A930034L06 gene                                               | -3.135 | 3.135 | 2.32 |
| A_51_P103222 | Slc39a4       | NM_028064    | solute carrier family 39 (zinc transporter), member 4                    | -3.115 | 3.115 | 3.45 |
| A_51_P431737 | Cth           | NM_145953    | cystathionase (cystathionine gamma-lyase)                                | -3.106 | 3.106 | 1.29 |
| A_51_P369998 | Sntg2         | NM_172951    | syntrophin, gamma 2                                                      | -3.086 | 3.086 | 4.44 |
| A_52_P410334 | NAP124154-1   | NAP124154-1  |                                                                          | -3.086 | 3.086 | 7.92 |
| A_52_P460584 | Tnfrsf25      | NM_033042    | tumor necrosis factor receptor superfamily, member 25                    | -3.021 | 3.021 | 3.43 |
| A_52_P804224 | AK141415      | AK141415     |                                                                          | -3.003 | 3.003 | 4.44 |
| A_52_P356343 | Fam13a        | NM_153574    | RIKEN cDNA D430015B01 gene                                               | -2.985 | 2.985 | 4.2  |
| A_52_P544060 | Ren1          | NM_031192    | renin 1 structural                                                       | -2.985 | 2.985 | 4.2  |
| A_52_P466648 | D00925        | D00925       |                                                                          | -2.941 | 2.941 | 3.43 |
| A_51_P410703 | Prss8         | NM_133351    | protease, serine, 8 (prostasin)                                          | -2.933 | 2.933 | 2.27 |
| A_51_P335569 | Slco1a4       | NM_030687    | solute carrier organic anion transporter family, member 1a4              | -2.933 | 2.933 | 7.92 |
| A_51_P185660 | Ccl9          | NM_011338    | chemokine (C-C motif) ligand 9                                           | -2.899 | 2.899 | 2.32 |
| A_52_P9703   | Cyp2a4        | NM_009997    | cytochrome P450, family 2, subfamily a, polypeptide 4                    | -2.89  | 2.89  | 3.45 |
| A_52_P376502 | Camk1d        | NM_177343    | calcium/calmodulin-dependent protein kinase ID                           | -2.874 | 2.874 | 3.43 |
| A_51_P409985 | Arl13b        | NM_026577    | ADP-ribosylation factor-like 13B                                         | -2.857 | 2.857 | 1.71 |
| A_51_P254895 | Cyp4a10       | NM_010011    | cDNA sequence BC013476                                                   | -2.857 | 2.857 | 3.45 |
| A_52_P530620 | Capn8         | NM_001145806 | calpain 8                                                                | -2.825 | 2.825 | 2.32 |
| A_51_P420415 | Srd5a1        | NM_175283    | steroid 5 alpha-reductase 1                                              | -2.809 | 2.809 | 3.43 |
| A_51_P342926 | Omd           | NM_012050    | osteomodulin                                                             | -2.809 | 2.809 | 0    |
| A_51_P279841 | Blnk          | NM_008528    | B-cell linker                                                            | -2.762 | 2.762 | 3.43 |
| A_52_P70888  | Snhg11        | NM_175692    | RIKEN cDNA A930034L06 gene                                               | -2.755 | 2.755 | 3.43 |
| A_51_P499369 | Tmem184c      | NM_145599    | transmembrane protein 34                                                 | -2.74  | 2.74  | 0    |
| A_51_P161946 | E130012A19Rik | NM_175332    | RIKEN cDNA E130012A19 gene                                               | -2.732 | 2.732 | 0    |
| A_52_P223646 | Cabyr         | NM_027687    | calcium-binding tyrosine-(Y)-phosphorylation regulated (fibrousheatin 2) | -2.725 | 2.725 | 4.96 |
| A_52_P16752  | Aox3          | NM_023617    | aldehyde oxidase 3                                                       | -2.725 | 2.725 | 1.71 |
| A_52_P658945 | Nlrp12        | NM_001033431 | NLR family, pyrin domain containing 12                                   | -2.681 | 2.681 | 7.92 |
| A_51_P420037 | Nup210        | NM_018815    | nucleoporin 210                                                          | -2.681 | 2.681 | 1.71 |
| A_51_P461429 | Cyp7b1        | NM_007825    | cytochrome P450, family 7, subfamily b, polypeptide 1                    | -2.674 | 2.674 | 4.2  |
| A_52_P327156 | 0610008F07Rik | NR_027970    | RIKEN cDNA 0610008F07 gene                                               | -2.646 | 2.646 | 0    |
| A_52_P384394 | Bmf           | NM_138313    | Bcl2 modifying factor                                                    | -2.604 | 2.604 | 9.3  |
| A_51_P224164 | Slc26a4       | NM_011867    | solute carrier family 26, member 4                                       | -2.584 | 2.584 | 2.27 |
| A_51_P386899 | Mfsd7c        | NM_145447    | cDNA sequence BC011209                                                   | -2.551 | 2.551 | 2.56 |
| A_52_P614777 | Sucnr1        | NM_032400    | succinate receptor 1                                                     | -2.545 | 2.545 | 4.96 |
| A_51_P279038 | Ppargc1a      | NM_008904    | peroxisome proliferative activated receptor, gamma, coactivator 1 alpha  | -2.532 | 2.532 | 3.43 |
| A_51_P409988 | Arl13b        | NM_026577    | ADP-ribosylation factor-like 13B                                         | -2.532 | 2.532 | 1.71 |
| A_52_P259817 | Upp2          | NM_029692    | uridine phosphorylase 2                                                  | -2.513 | 2.513 | 4.2  |
| A_51_P180891 | Ttc39c        | NM_028341    | RIKEN cDNA 2810439F02 gene                                               | -2.494 | 2.494 | 4.2  |
| A_52_P361673 | Myo1b         | NM_010863    | myosin IB                                                                | -2.494 | 2.494 | 1.29 |
| A_51_P268641 | A1cf          | NM_001081074 | RIKEN cDNA 1810073H04 gene                                               | -2.494 | 2.494 | 4.2  |

|              |               |              |                                                                                                   |        |       |      |
|--------------|---------------|--------------|---------------------------------------------------------------------------------------------------|--------|-------|------|
| A_52_P571290 | Ptms          | NM_026988    | parathyrosin                                                                                      | -2.451 | 2.451 | 3.43 |
| A_51_P250217 | A_51_P250217  | A_51_P250217 |                                                                                                   | -2.421 | 2.421 | 4.2  |
| A_51_P288916 | Tmtc2         | NM_177368    | transmembrane and tetratricopeptide repeat containing 2                                           | -2.415 | 2.415 | 2.32 |
| A_52_P318361 | Ces2          | NM_145603    | carboxylesterase 2                                                                                | -2.358 | 2.358 | 9.3  |
| A_51_P309307 | Bcl2l15       | NM_001142959 |                                                                                                   | -2.353 | 2.353 | 0    |
| A_52_P539161 | Rdh11         | NM_021557    | retinol dehydrogenase 11                                                                          | -2.347 | 2.347 | 3.45 |
| A_51_P272106 | Cirbp         | NM_007705    | cold inducible RNA binding protein                                                                | -2.336 | 2.336 | 4.44 |
| A_51_P189777 | Ccrn4l        | NM_009834    | CCR4 carbon catabolite repression 4-like (S. cerevisiae)                                          | -2.336 | 2.336 | 3.43 |
| A_51_P396198 | C4bp-ps1      | NR_028304    |                                                                                                   | -2.331 | 2.331 | 3.43 |
| A_52_P201106 | 4930473A06Rik | NM_001081012 | RIKEN cDNA 4930473A06 gene                                                                        | -2.32  | 2.32  | 2.32 |
| A_51_P488399 | Acss2         | NM_019811    | acyl-CoA synthetase short-chain family member 2                                                   | -2.32  | 2.32  | 5.56 |
| A_52_P370274 | Pde4b         | AK171700     | phosphodiesterase 4B, cAMP specific                                                               | -2.315 | 2.315 | 4.2  |
| A_52_P577084 | Srd5a1        | AK019597     |                                                                                                   | -2.304 | 2.304 | 6.58 |
| A_51_P349912 | Fmn1          | NM_010230    | formin 1                                                                                          | -2.299 | 2.299 | 1.29 |
| A_51_P381618 | Pla1a         | NM_134102    | phospholipase A1 member A                                                                         | -2.299 | 2.299 | 1.71 |
| A_52_P236207 | 2410089E03Rik | NM_001162906 | RIKEN cDNA 2410089E03 gene                                                                        | -2.278 | 2.278 | 3.43 |
| A_52_P624969 | NAP123621-1   | NAP123621-1  |                                                                                                   | -2.273 | 2.273 | 7.92 |
| A_51_P223396 | Ttc39b        | NM_027238    | RIKEN cDNA 1810054D07 gene                                                                        | -2.268 | 2.268 | 1.71 |
| A_51_P400366 | Rhbg          | NM_021375    | Rhesus blood group-associated B glycoprotein                                                      | -2.262 | 2.262 | 4.44 |
| A_51_P510418 | Aldh1b1       | NM_028270    | aldehyde dehydrogenase 1 family, member B1                                                        | -2.257 | 2.257 | 2.56 |
| A_52_P14456  | Srrm4         | NM_026886    | RIKEN cDNA 1500001A10 gene                                                                        | -2.252 | 2.252 | 2.56 |
| A_52_P499499 | 4833422F24Rik | NM_029021    | RIKEN cDNA 4833422F24 gene                                                                        | -2.247 | 2.247 | 2.32 |
| A_52_P374997 | E2f7          | NM_178609    | E2F transcription factor 7                                                                        | -2.237 | 2.237 | 4.2  |
| A_52_P627269 | BC015286      | NM_198171    | cDNA sequence BC015286                                                                            | -2.232 | 2.232 | 9.3  |
| A_51_P200610 | Zbtb12        | NM_198886    | zinc finger and BTB domain containing 12                                                          | -2.227 | 2.227 | 4.44 |
| A_51_P421538 | Nhedc2        | NM_178877    | expressed sequence C80638                                                                         | -2.222 | 2.222 | 1.71 |
| A_51_P469160 | Rdh11         | AY039032     | retinol dehydrogenase 11                                                                          | -2.222 | 2.222 | 4.96 |
| A_52_P284495 | Ankrd33b      | NM_026153    | RIKEN cDNA 5730557B15 gene                                                                        | -2.222 | 2.222 | 5.56 |
| A_51_P339540 | Cdkn1c        | NM_009876    | cyclin-dependent kinase inhibitor 1C (P57)                                                        | -2.222 | 2.222 | 2.32 |
| A_52_P103929 | Syt1          | NM_009306    | synaptotagmin I                                                                                   | -2.217 | 2.217 | 2.27 |
| A_52_P411205 | Gm10055       | XM_001476525 | predicted gene, ENSMUSG00000058934                                                                | -2.212 | 2.212 | 4.2  |
| A_52_P405090 | Polr3g        | NM_001081176 | polymerase (RNA) III (DNA directed) polypeptide G                                                 | -2.198 | 2.198 | 0    |
| A_52_P293222 | Ppargc1b      | AK042378     | peroxisome proliferative activated receptor, gamma, coactivator 1 beta                            | -2.198 | 2.198 | 6.58 |
| A_51_P335480 | 1810055G02Rik | NM_028077    | RIKEN cDNA 1810055G02 gene                                                                        | -2.193 | 2.193 | 4.2  |
| A_52_P481302 | NAP026914-1   | NAP026914-1  |                                                                                                   | -2.193 | 2.193 | 9.3  |
| A_51_P305140 | Gsta1         | NM_008181    | glutathione S-transferase, alpha 1 (Ya)                                                           | -2.183 | 2.183 | 4.2  |
| A_52_P643359 | Prpf4b        | NM_013830    | PRP4 pre-mRNA processing factor 4 homolog B (yeast)                                               | -2.183 | 2.183 | 2.56 |
| A_52_P10041  | Akr1b3        | NM_009658    | aldo-keto reductase family 1, member B3 (aldose reductase)                                        | -2.179 | 2.179 | 2.27 |
| A_51_P384436 | Ctrc          | NM_001033875 | chymotrypsin C (caldecrin)                                                                        | -2.179 | 2.179 | 3.43 |
| A_51_P463791 | Srrm3         | NM_021403    | RIKEN cDNA 2900083111 gene                                                                        | -2.165 | 2.165 | 1.29 |
| A_51_P245368 | Abcb1b        | NM_011075    | ATP-binding cassette, sub-family B (MDR/TAP), member 1B                                           | -2.165 | 2.165 | 2.27 |
| A_52_P387502 | Ubr2          | NM_146078    | ubiquitin protein ligase E3 component n-recogin 2                                                 | -2.16  | 2.16  | 3.43 |
| A_52_P602996 | 5730403B10Rik | NM_025670    | RIKEN cDNA 5730403B10 gene                                                                        | -2.155 | 2.155 | 2.27 |
| A_51_P504037 | Smarca2       | NM_011416    | SWI/SNF related, matrix associated, actin dependent regulator of chromatin, subfamily a, member 2 | -2.155 | 2.155 | 2.56 |
| A_52_P184145 | Fbxo21        | NM_145564    | F-box protein 21                                                                                  | -2.155 | 2.155 | 2.56 |
| A_51_P442366 | Diap2         | NM_172493    | diaphanous homolog 2 (Drosophila)                                                                 | -2.141 | 2.141 | 2.32 |
| A_51_P383399 | Aldh1a7       | NM_011921    | aldehyde dehydrogenase family 1, subfamily A7                                                     | -2.141 | 2.141 | 7.92 |

|              |                    |                    |                                                                                                  |        |       |      |
|--------------|--------------------|--------------------|--------------------------------------------------------------------------------------------------|--------|-------|------|
| A_52_P125485 | AU042651           | NM_177809          | expressed sequence AU042651                                                                      | -2.141 | 2.141 | 2.27 |
| A_52_P320193 | Clec2h             | NM_053165          | C-type lectin domain family 2, member h                                                          | -2.137 | 2.137 | 2.32 |
| A_51_P175424 | Car14              | NM_011797          | carbonic anhydrase 14                                                                            | -2.137 | 2.137 | 4.44 |
| A_52_P239752 | Ttc39c             | AK077971           | RIKEN cDNA 2810439F02 gene                                                                       | -2.132 | 2.132 | 6.58 |
| A_51_P299149 | Gpx6               | NM_145451          | glutathione peroxidase 6                                                                         | -2.132 | 2.132 | 2.27 |
| A_51_P436447 | Zfp871             | NM_172458          | RIKEN cDNA 9030612M13 gene                                                                       | -2.128 | 2.128 | 3.43 |
| A_52_P247513 | Hook3              | NM_207659          | hook homolog 3 (Drosophila)                                                                      | -2.128 | 2.128 | 3.45 |
| A_52_P228667 | A930004D18Rik      | NR_028376          | RIKEN cDNA A930004D18 gene                                                                       | -2.123 | 2.123 | 1.29 |
| A_51_P157406 | Ptgds              | NM_008963          | prostaglandin D2 synthase (brain)                                                                | -2.119 | 2.119 | 4.44 |
| A_51_P471177 | Stra6              | NM_009291          | stimulated by retinoic acid gene 6                                                               | -2.119 | 2.119 | 1.71 |
| A_51_P510891 | Afp                | NM_007423          | alpha fetoprotein                                                                                | -2.114 | 2.114 | 4.2  |
| A_52_P631613 | NAP014312-001      | NAP014312-001      |                                                                                                  | -2.114 | 2.114 | 3.43 |
| A_52_P344116 | Rnf6               | NM_028774          | ring finger protein (C3H2C3 type) 6                                                              | -2.11  | 2.11  | 2.56 |
| A_51_P157976 | Mmab               | NM_029956          | methylmalonic aciduria (cobalamin deficiency) type B homolog (human)                             | -2.105 | 2.105 | 4.96 |
| A_52_P475229 | Ep400              | NM_029337          | E1A binding protein p400                                                                         | -2.105 | 2.105 | 4.2  |
| A_52_P601437 | Dntt               | NM_009345          | deoxynucleotidyltransferase, terminal                                                            | -2.092 | 2.092 | 3.45 |
| A_52_P207314 | Htra4              | NM_001081187       | HtrA serine peptidase 4                                                                          | -2.088 | 2.088 | 4.96 |
| A_51_P256066 | Tiam2              | NM_011878          | T-cell lymphoma invasion and metastasis 2                                                        | -2.083 | 2.083 | 7.92 |
| A_51_P166152 | Spp2               | NM_029269          | secreted phosphoprotein 2                                                                        | -2.083 | 2.083 | 2.32 |
| A_51_P335849 | Ctnnbip1           | NM_023465          | catenin beta interacting protein 1                                                               | -2.075 | 2.075 | 5.56 |
| A_52_P102432 | Dsg1c              | AK034104           | desmoglein 1 gamma                                                                               | -2.075 | 2.075 | 4.2  |
| A_52_P94201  | Syt1               | NM_009306          | synaptotagmin I                                                                                  | -2.075 | 2.075 | 4.2  |
| A_52_P127280 | Anubl1             | NM_001081317       | AN1, ubiquitin-like, homolog (Xenopus laevis)                                                    | -2.07  | 2.07  | 2.56 |
| A_52_P461517 | Ubap2l             | NM_153489          | ubiquitin associated protein 2-like                                                              | -2.07  | 2.07  | 4.96 |
| A_52_P844857 | TC1760261          | TC1760261          |                                                                                                  | -2.066 | 2.066 | 3.45 |
| A_51_P510891 | Afp                | NM_007423          | alpha fetoprotein                                                                                | -2.066 | 2.066 | 2.56 |
| A_51_P268983 | Myom3              | NM_001085509       | myomesin family, member 3                                                                        | -2.062 | 2.062 | 3.45 |
| A_52_P662562 | NAP122883-1        | NAP122883-1        |                                                                                                  | -2.058 | 2.058 | 4.44 |
| A_52_P623211 | ENSMUST00000049544 | ENSMUST00000049544 | RIKEN cDNA 2610301F02 gene                                                                       | -2.058 | 2.058 | 4.44 |
| A_51_P418884 | BC020078           | BC020078           |                                                                                                  | -2.058 | 2.058 | 3.43 |
| A_52_P30451  | Ppp1r3c            | NM_016854          | protein phosphatase 1, regulatory (inhibitor) subunit 3C                                         | -2.058 | 2.058 | 6.58 |
| A_52_P424563 | Ddx1               | NM_134040          | DEAD (Asp-Glu-Ala-Asp) box polypeptide 1                                                         | -2.045 | 2.045 | 3.45 |
| A_51_P135268 | Corin              | NM_016869          | corin                                                                                            | -2.041 | 2.041 | 3.45 |
| A_52_P541118 | Snhg11             | NM_175692          | RIKEN cDNA A930034L06 gene                                                                       | -2.037 | 2.037 | 2.56 |
| A_52_P92121  | Ankrd33b           | NM_001164441       | RIKEN cDNA 3021401C12 gene                                                                       | -2.037 | 2.037 | 5.56 |
| A_52_P469956 | Zc3h6              | NM_178404          | zinc finger CCCH type containing 6                                                               | -2.037 | 2.037 | 4.96 |
| A_51_P294891 | Ppargc1b           | NM_133249          | peroxisome proliferative activated receptor, gamma, coactivator 1 beta                           | -2.037 | 2.037 | 6.58 |
| A_51_P116395 | Dhrs7b             | NM_145428          | dehydrogenase/reductase (SDR family) member 7B                                                   | -2.028 | 2.028 | 2.32 |
| A_51_P325651 | Cd47               | AK164165           | CD47 antigen (Rh-related antigen, integrin-associated signal transducer)                         | -2.028 | 2.028 | 7.92 |
| A_51_P352738 | Mpv17l             | NM_033564          | Mpv17 transgene, kidney disease mutant-like                                                      | -2.028 | 2.028 | 6.58 |
| A_52_P566718 | Acss2              | NM_019811          | acyl-CoA synthetase short-chain family member 2                                                  | -2.024 | 2.024 | 7.92 |
| A_52_P213889 | Tmc7               | NM_172476          | transmembrane channel-like gene family 7                                                         | -2.024 | 2.024 | 4.96 |
| A_51_P268929 | AK050061           | AK050061           |                                                                                                  | -2.02  | 2.02  | 2.56 |
| A_52_P281888 | C4bp-ps1           | NR_028304          |                                                                                                  | -2.02  | 2.02  | 3.43 |
| A_52_P379277 | Enpp3              | NM_134005          | ectonucleotide pyrophosphatase/phosphodiesterase 3                                               | -2.016 | 2.016 | 4.2  |
| A_51_P176912 | Hlcs               | NM_139145          | holocarboxylase synthetase (biotin- [propionyl-Coenzyme A-carboxylase (ATP-hydrolysing)] ligase) | -2.016 | 2.016 | 2.27 |
| A_52_P355276 | Smg6               | NM_001002764       | Smg-6 homolog, nonsense mediated mRNA decay factor (C. elegans)                                  | -2.016 | 2.016 | 3.45 |

|              |                    |                    |                                                                         |        |       |      |
|--------------|--------------------|--------------------|-------------------------------------------------------------------------|--------|-------|------|
| A_52_P147870 | Mrps5              | NM_029963          | mitochondrial ribosomal protein S5                                      | -2.012 | 2.012 | 3.43 |
| A_51_P510891 | Afp                | NM_007423          | alpha fetoprotein                                                       | -2.012 | 2.012 | 4.2  |
| A_51_P258766 | Smo                | NM_176996          | smoothened homolog (Drosophila)                                         | -2.012 | 2.012 | 4.96 |
| A_52_P187855 | Trim37             | NM_197987          | tripartite motif protein 37                                             | -2.012 | 2.012 | 3.45 |
| A_51_P124315 | ENSMUST00000113532 | ENSMUST00000113532 | cDNA sequence BC034076                                                  | -2.012 | 2.012 | 3.45 |
| A_51_P510891 | Afp                | NM_007423          | alpha fetoprotein                                                       | -2.008 | 2.008 | 3.43 |
| A_51_P431018 | Selenbp2           | NM_019414          | selenium binding protein 2                                              | -2.008 | 2.008 | 5.56 |
| A_51_P502872 | 2200002D01Rik      | NM_028179          |                                                                         | -2.008 | 2.008 | 3.43 |
| A_51_P512340 | Pde4b              | NM_019840          | phosphodiesterase 4B, cAMP specific                                     | -2.008 | 2.008 | 7.92 |
| A_51_P324134 | Hps4               | NM_138646          | Hermansky-Pudlak syndrome 4 homolog (human)                             | -2.008 | 2.008 | 4.2  |
| A_52_P625277 | Accs               | NM_183220          | RIKEN cDNA 2610203E10 gene                                              | -2.004 | 2.004 | 2.56 |
| A_52_P400967 | Arl13b             | NM_026577          | ADP-ribosylation factor-like 13B                                        | -2     | 2     | 2.56 |
| A_51_P413088 | Apob               | NM_009693          |                                                                         | -2     | 2     | 4.44 |
| A_51_P304397 | Cpm                | NM_027468          | carboxypeptidase M                                                      | -2     | 2     | 4.2  |
| A_52_P257774 | Cyp4a10            | NM_010011          | cytochrome P450, family 4, subfamily a, polypeptide 10                  | -1.996 | 1.996 | 5.56 |
| A_51_P116496 | BC024139           | NM_001142968       | cDNA sequence BC024139                                                  | -1.996 | 1.996 | 4.2  |
| A_52_P566840 | Gpr110             | NM_133776          | G protein-coupled receptor 110                                          | -1.996 | 1.996 | 3.45 |
| A_51_P510891 | Afp                | NM_007423          | alpha fetoprotein                                                       | -1.996 | 1.996 | 3.45 |
| A_51_P424221 | Irf2bp2            | NM_001164598       | interferon regulatory factor 2 binding protein 2                        | -1.992 | 1.992 | 6.58 |
| A_52_P258537 | 5430407P10Rik      | NM_144883          | RIKEN cDNA 5430407P10 gene                                              | -1.992 | 1.992 | 5.56 |
| A_51_P217336 | Scamp1             | NM_029153          | secretory carrier membrane protein 1                                    | -1.988 | 1.988 | 0    |
| A_51_P291139 | Upf3b              | NM_026573          | UPF3 regulator of nonsense transcripts homolog B (yeast)                | -1.988 | 1.988 | 2.27 |
| A_51_P220681 | Aldoc              | NM_009657          | aldolase 3, C isoform                                                   | -1.988 | 1.988 | 5.56 |
| A_52_P71146  | NAP041834-1        | NAP041834-1        |                                                                         | -1.988 | 1.988 | 3.45 |
| A_51_P301713 | A_51_P301713       | A_51_P301713       |                                                                         | -1.984 | 1.984 | 2.32 |
| A_52_P413348 | Fam35a             | NM_029389          | RIKEN cDNA 3110001K24 gene                                              | -1.98  | 1.98  | 3.43 |
| A_52_P5945   | Ppargc1a           | NM_008904          | peroxisome proliferative activated receptor, gamma, coactivator 1 alpha | -1.972 | 1.972 | 4.2  |
| A_51_P332917 | Enpp3              | BC005527           | ectonucleotide pyrophosphatase/phosphodiesterase 3                      | -1.969 | 1.969 | 6.58 |
| A_51_P136014 | Tfdp2              | S79780             | transcription factor Dp 2                                               | -1.969 | 1.969 | 2.27 |
| A_52_P225700 | ENSMUST00000113326 | ENSMUST00000113326 | forkhead box P1                                                         | -1.969 | 1.969 | 4.2  |
| A_51_P510891 | Afp                | NM_007423          | alpha fetoprotein                                                       | -1.965 | 1.965 | 3.45 |
| A_52_P675052 | Golgb1             | NM_030035          | golgi autoantigen, golgin subfamily b, macrogolgin 1                    | -1.961 | 1.961 | 3.45 |
| A_52_P676406 | Cdc3711            | NM_025950          | cell division cycle 37 homolog (S. cerevisiae)-like 1                   | -1.957 | 1.957 | 4.44 |
| A_51_P218535 | Neb                | NM_010889          | nebulin                                                                 | -1.957 | 1.957 | 4.2  |
| A_51_P512541 | Sdr39u1            | NM_001082975       | RIKEN cDNA 2310014G06 gene                                              | -1.953 | 1.953 | 3.45 |
| A_52_P148428 | Nfix               | ENSMUST00000109764 | nuclear factor I/X                                                      | -1.953 | 1.953 | 2.56 |
| A_52_P636038 | Park2              | NM_016694          | parkin                                                                  | -1.946 | 1.946 | 3.43 |
| A_52_P338626 | Nipal3             | NM_028995          | NIPA-like domain containing 3                                           | -1.946 | 1.946 | 4.2  |
| A_51_P144712 | Gbf1               | NM_178930          | golgi-specific brefeldin A-resistance factor 1                          | -1.942 | 1.942 | 3.45 |
| A_52_P564413 | Pik3c2g            | NM_207683          | phosphatidylinositol 3-kinase, C2 domain containing, gamma polypeptide  | -1.942 | 1.942 | 4.44 |
| A_52_P237176 | Kiss1              | NM_178260          | KiSS-1 metastasis-suppressor                                            | -1.942 | 1.942 | 3.45 |
| A_51_P452506 | Tmem189            | NM_145538          | expressed sequence AI840826                                             | -1.942 | 1.942 | 3.43 |
| A_51_P150763 | Ropn11             | NM_145852          | ropporin 1-like                                                         | -1.942 | 1.942 | 3.43 |
| A_52_P147803 | AI428936           | NM_153577          | expressed sequence AI428936                                             | -1.931 | 1.931 | 4.96 |
| A_51_P117581 | Cables1            | NM_022021          | Cdk5 and Abl enzyme substrate 1                                         | -1.931 | 1.931 | 7.92 |
| A_52_P135873 | Gm2744             | XM_001475453       |                                                                         | -1.931 | 1.931 | 3.43 |
| A_52_P337427 | 9030607L17Rik      | NM_027829          | RIKEN cDNA 9030607L17 gene                                              | -1.927 | 1.927 | 3.45 |

|              |               |              |                                                                 |        |       |      |
|--------------|---------------|--------------|-----------------------------------------------------------------|--------|-------|------|
| A_51_P495331 | Neb           | NM_010889    | nebulin                                                         | -1.927 | 1.927 | 2.27 |
| A_51_P331900 | Dlg3          | NM_016747    | discs, large homolog 3 (Drosophila)                             | -1.927 | 1.927 | 7.92 |
| A_51_P150770 | Ropn1l        | NM_145852    | ropporin 1-like                                                 | -1.923 | 1.923 | 3.43 |
| A_51_P236588 | 9430038I01Rik | NM_029886    | RIKEN cDNA 9430038I01 gene                                      | -1.919 | 1.919 | 4.44 |
| A_52_P487362 | Ppp4r4        | NM_028980    | RIKEN cDNA 8430415E04 gene                                      | -1.919 | 1.919 | 4.2  |
| A_52_P941128 | CF546364      | CF546364     |                                                                 | -1.916 | 1.916 | 4.44 |
| A_51_P161691 | Coq7          | NM_009940    | demethyl-Q 7                                                    | -1.916 | 1.916 | 4.2  |
| A_52_P633193 | 2810407C02Rik | AK017528     | RIKEN cDNA 2810407C02 gene                                      | -1.912 | 1.912 | 2.56 |
| A_51_P265695 | Gapdhs        | NM_008085    | glyceraldehyde-3-phosphate dehydrogenase, spermatogenic         | -1.908 | 1.908 | 2.32 |
| A_52_P574668 | Nt5e          | NM_011851    | 5' nucleotidase, ecto                                           | -1.901 | 1.901 | 3.45 |
| A_52_P550094 | Klhl24        | NM_029436    | kelch-like 24 (Drosophila)                                      | -1.898 | 1.898 | 4.2  |
| A_51_P510891 | Afp           | NM_007423    | alpha fetoprotein                                               | -1.898 | 1.898 | 2.56 |
| A_51_P130057 | Ppm1k         | NM_175523    | protein phosphatase 1K (PP2C domain containing)                 | -1.898 | 1.898 | 7.92 |
| A_51_P121302 | Them4         | NM_029431    | thioesterase superfamily member 4                               | -1.894 | 1.894 | 4.44 |
| A_52_P644613 | Sult1b1       | NM_019878    | sulfotransferase family 1B, member 1                            | -1.894 | 1.894 | 4.96 |
| A_52_P412796 | NAP043943-1   | NAP043943-1  |                                                                 | -1.894 | 1.894 | 3.45 |
| A_52_P572368 | 1300015D01Rik | AK005014     | RIKEN cDNA 1300015D01 gene                                      | -1.89  | 1.89  | 7.92 |
| A_51_P137481 | 1700011J10Rik | AK005870     | RIKEN cDNA 1700011J10 gene                                      | -1.89  | 1.89  | 3.43 |
| A_51_P502225 | Slc22a4       | NM_019687    | solute carrier family 22 (organic cation transporter), member 4 | -1.89  | 1.89  | 7.92 |
| A_52_P415996 | Gstm6         | NM_008184    | glutathione S-transferase, mu 6                                 | -1.883 | 1.883 | 5.56 |
| A_51_P266987 | Odf2          | NM_013615    | outer dense fiber of sperm tails 2                              | -1.883 | 1.883 | 3.45 |
| A_52_P477785 | Slc17a4       | NM_177016    | solute carrier family 17 (sodium phosphate), member 4           | -1.883 | 1.883 | 4.96 |
| A_52_P81252  | D14Ert436e    | NM_172599    | DNA segment, Chr 14, ERATO Doi 436, expressed                   | -1.88  | 1.88  | 7.92 |
| A_51_P329949 | Fam13a        | NM_153574    | RIKEN cDNA D430015B01 gene                                      | -1.88  | 1.88  | 6.58 |
| A_52_P354363 | Ino80         | NM_026574    | INO80 complex homolog 1 (S. cerevisiae)                         | -1.876 | 1.876 | 4.96 |
| A_52_P229770 | Akap13        | NM_029332    | A kinase (PRKA) anchor protein 13                               | -1.876 | 1.876 | 4.96 |
| A_52_P645285 | NAP040538-1   | NAP040538-1  |                                                                 | -1.873 | 1.873 | 5.56 |
| A_52_P800301 | NAP061993-1   | NAP061993-1  |                                                                 | -1.873 | 1.873 | 2.32 |
| A_52_P84901  | Slc44a1       | NM_133891    | solute carrier family 44, member 1                              | -1.869 | 1.869 | 1.29 |
| A_51_P385114 | Snhg11        | NM_175692    | RIKEN cDNA A930034L06 gene                                      | -1.869 | 1.869 | 3.43 |
| A_51_P456208 | Tff3          | NM_011575    | trefoil factor 3, intestinal                                    | -1.869 | 1.869 | 6.58 |
| A_51_P510891 | Afp           | NM_007423    | alpha fetoprotein                                               | -1.866 | 1.866 | 3.45 |
| A_51_P246773 | Sesn3         | NM_030261    | sestrin 3                                                       | -1.862 | 1.862 | 2.27 |
| A_51_P510891 | Afp           | NM_007423    | alpha fetoprotein                                               | -1.862 | 1.862 | 3.43 |
| A_52_P193236 | 1600002H07Rik | NM_028056    | RIKEN cDNA 1600002H07 gene                                      | -1.862 | 1.862 | 4.2  |
| A_52_P78373  | Sorbs3        | NM_011366    | sorbin and SH3 domain containing 3                              | -1.859 | 1.859 | 5.56 |
| A_52_P326354 | Erf           | NM_010155    | Ets2 repressor factor                                           | -1.859 | 1.859 | 4.44 |
| A_51_P161225 | Ddx46         | NM_145975    | DEAD (Asp-Glu-Ala-Asp) box polypeptide 46                       | -1.859 | 1.859 | 2.27 |
| A_52_P663303 | Wdr60         | NM_146039    | WD repeat domain 60                                             | -1.859 | 1.859 | 4.2  |
| A_51_P318804 | Shpk          | NM_029031    | carbohydrate kinase-like                                        | -1.855 | 1.855 | 5.56 |
| A_52_P634329 | Gm7298        | XM_001480274 | predicted gene, EG640530                                        | -1.855 | 1.855 | 2.32 |
| A_52_P276792 | Foxp1         | NM_053202    | forkhead box P1                                                 | -1.852 | 1.852 | 5.56 |
| A_52_P306387 | Rnf214        | NM_178709    | ring finger protein 214                                         | -1.852 | 1.852 | 4.2  |
| A_51_P265695 | Gapdhs        | NM_008085    | glyceraldehyde-3-phosphate dehydrogenase, spermatogenic         | -1.852 | 1.852 | 2.32 |
| A_51_P474169 | 5430407P10Rik | NM_144883    | RIKEN cDNA 5430407P10 gene                                      | -1.852 | 1.852 | 6.58 |
| A_51_P510891 | Afp           | NM_007423    | alpha fetoprotein                                               | -1.852 | 1.852 | 5.56 |
| A_51_P488554 | 3010026O09Rik | NM_026543    | RIKEN cDNA 3010026O09 gene                                      | -1.848 | 1.848 | 9.3  |
| A_51_P265695 | Gapdhs        | NM_008085    | glyceraldehyde-3-phosphate dehydrogenase, spermatogenic         | -1.848 | 1.848 | 3.43 |

|               |                    |                    |                                                                                                |        |       |      |
|---------------|--------------------|--------------------|------------------------------------------------------------------------------------------------|--------|-------|------|
| A_52_P392229  | Rnf152             | AK039635           | ring finger protein 152                                                                        | -1.848 | 1.848 | 4.2  |
| A_51_P479618  | Rdh5               | NM_134006          | retinol dehydrogenase 5                                                                        | -1.845 | 1.845 | 4.44 |
| A_51_P255295  | C9                 | NM_013485          | complement component 9                                                                         | -1.845 | 1.845 | 3.45 |
| A_51_P155323  | Hc                 | NM_010406          | hemolytic complement                                                                           | -1.845 | 1.845 | 4.2  |
| A_51_P323443  | Vapb               | NM_019806          | vesicle-associated membrane protein, associated protein B and C                                | -1.845 | 1.845 | 7.92 |
| A_51_P206551  | Sult1b1            | NM_019878          | sulfotransferase family 1B, member 1                                                           | -1.845 | 1.845 | 4.96 |
| A_51_P434928  | Olf114             | NM_146287          | olfactory receptor 114                                                                         | -1.835 | 1.835 | 4.44 |
| A_52_P300344  | Pm20d1             | NM_178079          | RIKEN cDNA 4732466D17 gene                                                                     | -1.835 | 1.835 | 3.45 |
| A_51_P265695  | Gapdhs             | NM_008085          | glyceraldehyde-3-phosphate dehydrogenase, spermatogenic                                        | -1.835 | 1.835 | 3.43 |
| A_52_P1156465 | Mbd2               | AK083162           |                                                                                                | -1.835 | 1.835 | 1.71 |
| A_51_P266958  | Nr1i2              | NM_010936          | nuclear receptor subfamily 1, group I, member 2                                                | -1.835 | 1.835 | 7.92 |
| A_52_P423247  | Pde4b              | NM_019840          | phosphodiesterase 4B, cAMP specific                                                            | -1.832 | 1.832 | 9.3  |
| A_51_P478008  | Bclaf1             | NM_001025393       | BCL2-associated transcription factor 1                                                         | -1.828 | 1.828 | 2.27 |
| A_52_P346706  | Akr1b3             | NM_009658          | aldo-keto reductase family 1, member B3 (aldose reductase)                                     | -1.828 | 1.828 | 3.43 |
| A_52_P464570  | Wwp1               | NM_177327          | WW domain containing E3 ubiquitin protein ligase 1                                             | -1.828 | 1.828 | 4.44 |
| A_51_P394512  | AK032729           | AK032729           |                                                                                                | -1.825 | 1.825 | 4.96 |
| A_51_P492408  | Pmvk               | NM_026784          | phosphomevalonate kinase                                                                       | -1.825 | 1.825 | 9.3  |
| A_51_P466221  | Amhr2              | NM_144547          | anti-Mullerian hormone type 2 receptor                                                         | -1.821 | 1.821 | 2.32 |
| A_52_P175242  | Irs1               | NM_010570          | insulin receptor substrate 1                                                                   | -1.821 | 1.821 | 5.56 |
| A_51_P299805  | Slc46a3            | NM_027872          | solute carrier family 46, member 3                                                             | -1.821 | 1.821 | 4.96 |
| A_52_P317653  | Car1               | NM_009799          | carbonic anhydrase 1                                                                           | -1.815 | 1.815 | 2.56 |
| A_51_P249335  | Sds                | NM_145565          | serine dehydratase                                                                             | -1.815 | 1.815 | 7.92 |
| A_52_P307938  | Pik3r1             | NM_001077495       | phosphatidylinositol 3-kinase, regulatory subunit, polypeptide 1 (p85 alpha)                   | -1.812 | 1.812 | 5.56 |
| A_51_P492410  | Pmvk               | NM_026784          | phosphomevalonate kinase                                                                       | -1.812 | 1.812 | 9.3  |
| A_52_P150525  | 2310030N02Rik      | NM_001085493       | RIKEN cDNA 2310030N02 gene                                                                     | -1.812 | 1.812 | 3.45 |
| A_52_P466288  | Tmem161b           | NM_175187          | transmembrane protein 161B                                                                     | -1.808 | 1.808 | 2.56 |
| A_51_P265695  | Gapdhs             | NM_008085          | glyceraldehyde-3-phosphate dehydrogenase, spermatogenic                                        | -1.808 | 1.808 | 2.27 |
| A_51_P131315  | Serpina9           | NM_027997          | serine (or cysteine) peptidase inhibitor, clade A (alpha-1 antitrypsin, antitrypsin), member 9 | -1.808 | 1.808 | 7.92 |
| A_51_P297900  | Syt1               | NM_009306          | synaptotagmin I                                                                                | -1.808 | 1.808 | 3.45 |
| A_52_P684647  | Ptk2b              | NM_172498          | PTK2 protein tyrosine kinase 2 beta                                                            | -1.805 | 1.805 | 4.96 |
| A_52_P811124  | AK047019           | AK047019           |                                                                                                | -1.805 | 1.805 | 2.56 |
| A_51_P265695  | Gapdhs             | NM_008085          | glyceraldehyde-3-phosphate dehydrogenase, spermatogenic                                        | -1.805 | 1.805 | 4.96 |
| A_51_P466229  | Pdgfrl             | NM_026840          | platelet-derived growth factor receptor-like                                                   | -1.805 | 1.805 | 7.92 |
| A_52_P609448  | Brwd1              | NM_145125          | bromodomain and WD repeat domain containing 1                                                  | -1.802 | 1.802 | 4.96 |
| A_52_P408338  | ENSMUST00000106059 | ENSMUST00000106059 | S100P binding protein                                                                          | -1.799 | 1.799 | 3.43 |
| A_52_P1164839 | Onecut2            | NM_194268          | one cut domain, family member 2                                                                | -1.799 | 1.799 | 3.45 |
| A_51_P213666  | Pσμα8              | NM_001163609       | proteasome (prosome, macropain) subunit, alpha type, 8                                         | -1.795 | 1.795 | 3.43 |
| A_51_P469951  | Srgap3             | NM_080448          | SLIT-ROBO Rho GTPase activating protein 3                                                      | -1.795 | 1.795 | 6.58 |
| A_52_P78033   | Ip6k2              | AK005166           | inositol hexaphosphate kinase 2                                                                | -1.795 | 1.795 | 5.56 |
| A_51_P160576  | Brsk2              | AK014760           | BR serine/threonine kinase 2                                                                   | -1.795 | 1.795 | 9.3  |
| A_52_P521163  | Zfp644             | NM_026856          | zinc finger protein 644                                                                        | -1.795 | 1.795 | 4.2  |
| A_51_P253359  | 5730403B10Rik      | NM_025670          | RIKEN cDNA 5730403B10 gene                                                                     | -1.792 | 1.792 | 4.96 |
| A_51_P517388  | Plbd1              | NM_025806          | RIKEN cDNA 1100001H23 gene                                                                     | -1.792 | 1.792 | 3.45 |
| A_51_P265695  | Gapdhs             | NM_008085          | glyceraldehyde-3-phosphate dehydrogenase, spermatogenic                                        | -1.789 | 1.789 | 3.45 |
| A_52_P61903   | Chka               | AK014174           | choline kinase alpha                                                                           | -1.789 | 1.789 | 9.3  |



|               |                    |                    |                                                                                |        |       |      |
|---------------|--------------------|--------------------|--------------------------------------------------------------------------------|--------|-------|------|
| A_51_P341918  | Tsc22d1            | NM_009366          | TSC22 domain family, member 1                                                  | -1.789 | 1.789 | 9.3  |
| A_51_P331570  | Trib3              | NM_175093          | tribbles homolog 3 (Drosophila)                                                | -1.786 | 1.786 | 9.3  |
| A_52_P79763   | Thrap3             | NM_146153          | thyroid hormone receptor associated protein 3                                  | -1.786 | 1.786 | 2.56 |
| A_52_P336259  | Mll3               | NM_001081383       | myeloid/lymphoid or mixed-lineage leukemia 3                                   | -1.783 | 1.783 | 2.56 |
| A_51_P475580  | Ugp2               | NM_139297          | UDP-glucose pyrophosphorylase 2                                                | -1.783 | 1.783 | 1.29 |
| A_51_P252000  | Susd4              | NM_144796          | sushi domain containing 4                                                      | -1.779 | 1.779 | 3.45 |
| A_51_P327141  | Zap70              | NM_009539          | zeta-chain (TCR) associated protein kinase                                     | -1.776 | 1.776 | 4.2  |
| A_51_P428578  | Fam134b            | NM_025459          | RIKEN cDNA 1810015C04 gene                                                     | -1.776 | 1.776 | 4.96 |
| A_51_P320434  | Smg6               | NM_001002764       | Smg-6 homolog, nonsense mediated mRNA decay factor (C. elegans)                | -1.776 | 1.776 | 4.44 |
| A_52_P76146   | Dnmt3a             | NM_153743          | DNA methyltransferase 3A                                                       | -1.776 | 1.776 | 3.43 |
| A_51_P424550  | Slc23a3            | NM_194333          | solute carrier family 23 (nucleobase transporters), member 3                   | -1.776 | 1.776 | 7.92 |
| A_52_P552547  | 1110054M08Rik      | XM_001479385       | RIKEN cDNA 1110054M08 gene                                                     | -1.773 | 1.773 | 4.2  |
| A_52_P334301  | E130304F04Rik      | NM_175538          | RIKEN cDNA E130304F04 gene                                                     | -1.773 | 1.773 | 4.44 |
| A_52_P599578  | Cald1              | NM_145575          | caldesmon 1                                                                    | -1.77  | 1.77  | 3.43 |
| A_51_P377557  | Cpsf4l             | NM_029794          | DNA segment, Chr 11, ERATO Doi 636, expressed                                  | -1.77  | 1.77  | 7.92 |
| A_52_P373024  | Efha1              | NM_028643          | EF hand domain family A1                                                       | -1.767 | 1.767 | 3.45 |
| A_52_P94055   | Pcm1               | NM_023662          | pericentriolar material 1                                                      | -1.767 | 1.767 | 4.44 |
| A_52_P453650  | 1500011K16Rik      | NR_015476          |                                                                                | -1.767 | 1.767 | 5.56 |
| A_51_P192089  | 2610028A01Rik      | NM_028228          | RIKEN cDNA 2610028A01 gene                                                     | -1.767 | 1.767 | 2.32 |
| A_51_P265695  | Gapdhs             | NM_008085          | glyceraldehyde-3-phosphate dehydrogenase, spermatogenic                        | -1.767 | 1.767 | 4.2  |
| A_51_P362483  | Slc43a1            | NM_001081349       | solute carrier family 43, member 1                                             | -1.764 | 1.764 | 4.96 |
| A_52_P381484  | Spon2              | NM_133903          | spondin 2, extracellular matrix protein                                        | -1.764 | 1.764 | 7.92 |
| A_52_P1126526 | Nucks1             | NM_175294          | nuclear casein kinase and cyclin-dependent kinase substrate 1                  | -1.764 | 1.764 | 4.96 |
| A_52_P120842  | Man1a2             | NM_010763          | mannosidase, alpha, class 1A, member 2                                         | -1.761 | 1.761 | 4.96 |
| A_52_P336080  | Eif5               | AK051980           | eukaryotic translation initiation factor 5                                     | -1.761 | 1.761 | 3.45 |
| A_51_P384515  | Ido2               | NM_145949          | indoleamine-pyrrole 2,3 dioxygenase-like 1                                     | -1.757 | 1.757 | 6.58 |
| A_52_P37702   | ENSMUST00000045307 | ENSMUST00000045307 |                                                                                | -1.754 | 1.754 | 4.2  |
| A_52_P569348  | Dbt                | NM_010022          | dihydroipoamide branched chain transacylase E2                                 | -1.754 | 1.754 | 3.43 |
| A_52_P645862  | Agtr1a             | NM_177322          | angiotensin II receptor, type 1a                                               | -1.751 | 1.751 | 4.44 |
| A_52_P654965  | Eif3j              | NM_144545          | eukaryotic translation initiation factor 3, subunit 1 alpha                    | -1.751 | 1.751 | 4.2  |
| A_52_P547965  | Chd1               | NM_007690          | chromodomain helicase DNA binding protein 1                                    | -1.751 | 1.751 | 5.56 |
| A_51_P479311  | Gstm1              | NM_010358          | glutathione S-transferase, mu 1                                                | -1.751 | 1.751 | 9.3  |
| A_51_P213691  | Scnn1a             | NM_011324          | sodium channel, nonvoltage-gated, type I, alpha                                | -1.748 | 1.748 | 5.56 |
| A_52_P325388  | Ttc39c             | AK080904           | RIKEN cDNA 2810439F02 gene                                                     | -1.748 | 1.748 | 4.44 |
| A_51_P172344  | Foxn3              | NM_183186          | checkpoint suppressor 1                                                        | -1.748 | 1.748 | 5.56 |
| A_52_P19606   | Osbp1a             | NM_207530          | oxysterol binding protein-like 1A                                              | -1.748 | 1.748 | 4.96 |
| A_51_P406346  | Magi1              | NM_010367          | membrane associated guanylate kinase, WW and PDZ domain containing 1           | -1.748 | 1.748 | 2.27 |
| A_51_P171728  | Ceacam2            | NM_007543          | CEA-related cell adhesion molecule 1                                           | -1.745 | 1.745 | 2.32 |
| A_52_P504268  | B3galnt1           | NM_020026          | UDP-GalNAc:betaGlcNAc beta 1,3-galactosaminyltransferase, polypeptide 1        | -1.745 | 1.745 | 4.96 |
| A_52_P35064   | Tm7sf2             | NM_028454          | transmembrane 7 superfamily member 2                                           | -1.745 | 1.745 | 7.92 |
| A_52_P384574  | Stard4             | NM_133774          | StAR-related lipid transfer (START) domain containing 4                        | -1.745 | 1.745 | 4.96 |
| A_51_P278018  | Vps36              | NM_027338          | vacuolar protein sorting 36 (yeast)                                            | -1.745 | 1.745 | 4.2  |
| A_52_P237077  | Esr1               | NM_007956          | estrogen receptor 1 (alpha)                                                    | -1.745 | 1.745 | 4.44 |
| A_52_P1037549 | BF721801           | BF721801           |                                                                                | -1.745 | 1.745 | 6.58 |
| A_52_P199360  | Cdk13              | NM_027118          | cell division cycle 2-like 5 (cholinesterase-related cell division controller) | -1.742 | 1.742 | 4.44 |

|              |                    |                    |                                                                               |        |       |      |
|--------------|--------------------|--------------------|-------------------------------------------------------------------------------|--------|-------|------|
| A_51_P236314 | Ndst1              | AK004787           | N-deacetylase/N-sulfotransferase (heparan glucosaminyl) 1                     | -1.742 | 1.742 | 3.43 |
| A_51_P127215 | Sesn3              | AK033655           | sestrin 3                                                                     | -1.742 | 1.742 | 4.96 |
| A_52_P198239 | Ube2u              | NM_001033773       | ubiquitin-conjugating enzyme E2U (putative)                                   | -1.742 | 1.742 | 7.92 |
| A_52_P363110 | Fgfr2              | NM_010207          | fibroblast growth factor receptor 2                                           | -1.742 | 1.742 | 5.56 |
| A_51_P371311 | Slc1a4             | NM_018861          | solute carrier family 1 (glutamate/neutral amino acid transporter), member 4  | -1.742 | 1.742 | 3.45 |
| A_51_P174645 | Asl                | NM_133768          | argininosuccinate lyase                                                       | -1.742 | 1.742 | 5.56 |
| A_51_P235816 | Tsc22d3            | AF024519           | TSC22 domain family 3                                                         | -1.739 | 1.739 | 9.3  |
| A_52_P168319 | Mia2               | NM_177321          | melanoma inhibitory activity 2                                                | -1.736 | 1.736 | 4.44 |
| A_52_P416123 | Malat1             | NR_002847          | receptor (calcitonin) activity modifying protein 2                            | -1.736 | 1.736 | 6.58 |
| A_52_P237077 | Esr1               | NM_007956          | estrogen receptor 1 (alpha)                                                   | -1.733 | 1.733 | 4.44 |
| A_51_P461578 | Fdxr               | NM_007997          | ferredoxin reductase                                                          | -1.733 | 1.733 | 3.43 |
| A_52_P362981 | ENSMUST00000068960 | ENSMUST00000068960 | RIKEN cDNA D830050J10 gene                                                    | -1.733 | 1.733 | 2.56 |
| A_51_P250934 | Hsd17b7            | NM_010476          | hydroxysteroid (17-beta) dehydrogenase 7                                      | -1.73  | 1.73  | 6.58 |
| A_52_P599014 | Kif1b              | NM_207682          | kinesin family member 1B                                                      | -1.73  | 1.73  | 4.44 |
| A_52_P629487 | Selenbp1           | NM_009150          | selenium binding protein 1                                                    | -1.73  | 1.73  | 5.56 |
| A_52_P237077 | Esr1               | NM_007956          | estrogen receptor 1 (alpha)                                                   | -1.73  | 1.73  | 4.44 |
| A_51_P291713 | Ncald              | NM_134094          | neurocalcin delta                                                             | -1.73  | 1.73  | 9.3  |
| A_51_P417917 | Plekhg5            | NM_001004156       | pleckstrin homology domain containing, family G (with RhoGef domain) member 5 | -1.727 | 1.727 | 4.96 |
| A_51_P402583 | Gpld1              | NM_008156          | glycosylphosphatidylinositol specific phospholipase D1                        | -1.727 | 1.727 | 7.92 |
| A_51_P125779 | Serpina3a          | NM_001167705       | serine (or cysteine) peptidase inhibitor, clade A, member 3A                  | -1.727 | 1.727 | 4.96 |
| A_52_P330201 | Atp5sl             | NM_025504          | RIKEN cDNA 2310004L02 gene                                                    | -1.727 | 1.727 | 6.58 |
| A_52_P78423  | 5330421C15Rik      | AK039175           | RIKEN cDNA 5330421C15 gene                                                    | -1.727 | 1.727 | 7.92 |
| A_51_P210560 | Pptc7              | NM_177242          | PTC7 protein phosphatase homolog (S. cerevisiae)                              | -1.727 | 1.727 | 4.2  |
| A_52_P122393 | Zfc3h1             | NM_001033261       | coiled-coil domain containing 131                                             | -1.724 | 1.724 | 4.2  |
| A_51_P348183 | Tmem141            | NM_001040130       | transmembrane protein 141                                                     | -1.724 | 1.724 | 7.92 |
| A_51_P125629 | Rgs12              | NM_173402          | regulator of G-protein signaling 12                                           | -1.724 | 1.724 | 4.96 |
| A_52_P237077 | Esr1               | NM_007956          | estrogen receptor 1 (alpha)                                                   | -1.724 | 1.724 | 4.44 |
| A_51_P504546 | Aldh1l1            | NM_027406          | aldehyde dehydrogenase 1 family, member L1                                    | -1.721 | 1.721 | 6.58 |
| A_52_P526724 | Ppargc1b           | NM_133249          | peroxisome proliferative activated receptor, gamma, coactivator 1 beta        | -1.721 | 1.721 | 9.3  |
| A_52_P876218 | Slc8a1             | NM_011406          | solute carrier family 8 (sodium/calcium exchanger), member 1                  | -1.721 | 1.721 | 5.56 |
| A_52_P528592 | Rbm9               | NM_175387          | RNA binding motif protein 9                                                   | -1.718 | 1.718 | 9.3  |
| A_52_P98778  | Ang4               | NM_177544          | angiogenin, ribonuclease A family, member 4                                   | -1.718 | 1.718 | 7.92 |
| A_51_P507880 | Ppp4r4             | NM_028980          | RIKEN cDNA 8430415E04 gene                                                    | -1.718 | 1.718 | 4.96 |
| A_52_P290088 | Stbd1              | AK021293           | DNA segment, Chr 5, ERATO Doi 593, expressed                                  | -1.718 | 1.718 | 3.45 |
| A_51_P229325 | Smyd3              | NM_027188          | SET and MYND domain containing 3                                              | -1.718 | 1.718 | 4.2  |
| A_51_P276063 | Phyh               | NM_010726          | phytanoyl-CoA hydroxylase                                                     | -1.718 | 1.718 | 4.44 |
| A_51_P467971 | Ank3               | NM_146005          | ankyrin 3, epithelial                                                         | -1.715 | 1.715 | 5.56 |
| A_52_P673519 | Nek1               | NM_175089          | NIMA (never in mitosis gene a)-related expressed kinase 1                     | -1.715 | 1.715 | 3.45 |
| A_51_P107243 | AK079264           | AK079264           |                                                                               | -1.715 | 1.715 | 4.44 |
| A_51_P384033 | Psen2              | NM_011183          | presenilin 2                                                                  | -1.715 | 1.715 | 7.92 |
| A_51_P449995 | C6                 | NM_016704          | complement component 6                                                        | -1.712 | 1.712 | 5.56 |
| A_51_P515173 | Zkscan17           | NM_172941          | zinc finger with KRAB and SCAN domains 17                                     | -1.712 | 1.712 | 4.2  |
| A_51_P106859 | Lsm10              | NM_138721          | U7 snRNP-specific Sm-like protein LSM10                                       | -1.709 | 1.709 | 9.3  |
| A_52_P633393 | Cxxc5              | NM_133687          | CXXC finger 5                                                                 | -1.709 | 1.709 | 7.92 |
| A_51_P194853 | Sec14l4            | NM_146013          | SEC14-like 4 (S. cerevisiae)                                                  | -1.709 | 1.709 | 3.45 |
| A_51_P151214 | C8b                | NM_133882          | complement component 8, beta subunit                                          | -1.709 | 1.709 | 9.3  |

|               |               |              |                                                                                           |        |       |      |
|---------------|---------------|--------------|-------------------------------------------------------------------------------------------|--------|-------|------|
| A_52_P684130  | 2510002D24Rik | NM_001033164 | RIKEN cDNA 2510002D24 gene                                                                | -1.709 | 1.709 | 2.32 |
| A_52_P107571  | Rsrc1         | NM_025822    | arginine/serine-rich coiled-coil 1                                                        | -1.706 | 1.706 | 4.2  |
| A_51_P453111  | Hexb          | NM_010422    | hexosaminidase B                                                                          | -1.706 | 1.706 | 7.92 |
| A_51_P189442  | Adh4          | NM_011996    | alcohol dehydrogenase 4 (class II), pi polypeptide                                        | -1.704 | 1.704 | 9.3  |
| A_51_P436346  | 1810013D15Rik | AK007475     | RIKEN cDNA 1810013D15 gene                                                                | -1.701 | 1.701 | 4.96 |
| A_51_P223132  | Tln2          | NM_001081242 | talín 2                                                                                   | -1.701 | 1.701 | 3.45 |
| A_52_P409778  | Wdfy3         | NM_172882    | WD repeat and FYVE domain containing 3                                                    | -1.698 | 1.698 | 3.43 |
| A_51_P167489  | Lama3         | NM_010680    | laminin, alpha 3                                                                          | -1.698 | 1.698 | 4.2  |
| A_52_P409900  | Golim4        | NM_175193    | golgi phosphoprotein 4                                                                    | -1.698 | 1.698 | 3.45 |
| A_51_P396752  | Arl2bp        | NM_024191    | ADP-ribosylation factor-like 2 binding protein                                            | -1.698 | 1.698 | 7.92 |
| A_51_P309854  | Kcnn2         | NM_080465    | potassium intermediate/small conductance calcium-activated channel, subfamily N, member 2 | -1.698 | 1.698 | 2.56 |
| A_51_P486008  | Rbm25         | NM_027349    | RNA binding motif protein 25                                                              | -1.695 | 1.695 | 4.44 |
| A_51_P224013  | Tk1           | NM_009387    | thymidine kinase 1                                                                        | -1.695 | 1.695 | 7.92 |
| A_52_P474719  | Lrrc16a       | NM_026825    | leucine rich repeat containing 16                                                         | -1.695 | 1.695 | 6.58 |
| A_52_P237077  | Esr1          | NM_007956    | estrogen receptor 1 (alpha)                                                               | -1.692 | 1.692 | 4.44 |
| A_51_P357573  | Cald1         | NM_145575    | caldesmon 1                                                                               | -1.692 | 1.692 | 7.92 |
| A_51_P310967  | Aifm2         | NM_153779    | apoptosis-inducing factor, mitochondrion-associated 2                                     | -1.692 | 1.692 | 5.56 |
| A_51_P159895  | Dnajc1        | NM_007869    | DnaJ (Hsp40) homolog, subfamily C, member 1                                               | -1.692 | 1.692 | 4.96 |
| A_52_P234127  | Odz3          | NM_011857    | odd Oz/ten-m homolog 3 (Drosophila)                                                       | -1.692 | 1.692 | 5.56 |
| A_52_P1045790 | Al385586      | Al385586     |                                                                                           | -1.689 | 1.689 | 4.2  |
| A_51_P359078  | Rangrf        | NM_021329    | RIKEN cDNA 2400006H24 gene                                                                | -1.689 | 1.689 | 2.56 |
| A_52_P237077  | Esr1          | NM_007956    | estrogen receptor 1 (alpha)                                                               | -1.686 | 1.686 | 4.2  |
| A_51_P325501  | Crip3         | NM_053250    | cysteine-rich protein 3                                                                   | -1.686 | 1.686 | 9.3  |
| A_51_P334789  | Nudt16        | NM_029385    | nudix (nucleoside diphosphate linked moiety X)-type motif 16                              | -1.686 | 1.686 | 5.56 |
| A_51_P267653  | Olfm3         | NM_153157    | olfactomedin 3                                                                            | -1.686 | 1.686 | 4.96 |
| A_52_P249672  | 4833417J20Rik | AK014716     | RIKEN cDNA 4833417J20 gene                                                                | -1.684 | 1.684 | 4.96 |
| A_52_P365011  | Fes           | NM_010194    | feline sarcoma oncogene                                                                   | -1.684 | 1.684 | 4.2  |
| A_52_P26976   | Rbm28         | NM_133925    | RNA binding motif protein 28                                                              | -1.684 | 1.684 | 4.2  |
| A_52_P286928  | NAP115494-1   | NAP115494-1  |                                                                                           | -1.684 | 1.684 | 2.56 |
| A_51_P431329  | Car3          | NM_007606    | carbonic anhydrase 3                                                                      | -1.684 | 1.684 | 9.3  |
| A_52_P626101  | Letm2         | AK041725     | RIKEN cDNA D030041N04 gene                                                                | -1.684 | 1.684 | 4.2  |
| A_51_P309854  | Kcnn2         | NM_080465    | potassium intermediate/small conductance calcium-activated channel, subfamily N, member 2 | -1.684 | 1.684 | 2.56 |
| A_51_P502906  | Ang4          | BC132444     | angiogenin, ribonuclease A family, member 4                                               | -1.681 | 1.681 | 7.92 |
| A_51_P417025  | Tpst1         | NM_013837    | protein-tyrosine sulfotransferase 1                                                       | -1.681 | 1.681 | 4.44 |
| A_51_P492797  | Lrrc61        | NM_177736    | leucine rich repeat containing 61                                                         | -1.681 | 1.681 | 3.43 |
| A_52_P237077  | Esr1          | NM_007956    | estrogen receptor 1 (alpha)                                                               | -1.678 | 1.678 | 4.44 |
| A_51_P309854  | Kcnn2         | NM_080465    | potassium intermediate/small conductance calcium-activated channel, subfamily N, member 2 | -1.675 | 1.675 | 2.56 |
| A_51_P380215  | Prkacb        | NM_011100    | protein kinase, cAMP dependent, catalytic, beta                                           | -1.675 | 1.675 | 4.96 |
| A_51_P393161  | Scaper        | NM_001081341 | zinc finger protein 291                                                                   | -1.675 | 1.675 | 9.3  |
| A_51_P309854  | Kcnn2         | NM_080465    | potassium intermediate/small conductance calcium-activated channel, subfamily N, member 2 | -1.675 | 1.675 | 2.56 |
| A_51_P349888  | Ang2          | NM_007449    | angiogenin, ribonuclease A family, member 2                                               | -1.672 | 1.672 | 7.92 |
| A_52_P594768  | Aprt          | NM_009698    | adenine phosphoribosyl transferase                                                        | -1.672 | 1.672 | 3.45 |
| A_52_P237077  | Esr1          | NM_007956    | estrogen receptor 1 (alpha)                                                               | -1.672 | 1.672 | 4.44 |
| A_52_P51564   | Arhgap10      | NM_030113    | Rho GTPase activating protein 10                                                          | -1.672 | 1.672 | 4.96 |
| A_51_P101545  | Hgfac         | NM_019447    | hepatocyte growth factor activator                                                        | -1.672 | 1.672 | 3.45 |
| A_52_P329105  | Rbm26         | AK049083     | RNA binding motif protein 26                                                              | -1.669 | 1.669 | 7.92 |
| A_52_P440265  | LOC100048116  | XM_001479554 |                                                                                           | -1.669 | 1.669 | 6.58 |
| A_52_P601891  | LOC100047822  | XM_001478931 | zinc finger protein 668                                                                   | -1.669 | 1.669 | 5.56 |

|               |               |              |                                                                                           |        |       |      |
|---------------|---------------|--------------|-------------------------------------------------------------------------------------------|--------|-------|------|
| A_52_P67849   | Dync2h1       | NM_029851    | dynein cytoplasmic 2 heavy chain 1                                                        | -1.669 | 1.669 | 6.58 |
| A_52_P382731  | Rbbp4         | AK140625     |                                                                                           | -1.669 | 1.669 | 3.45 |
| A_51_P309854  | Kcnn2         | NM_080465    | potassium intermediate/small conductance calcium-activated channel, subfamily N, member 2 | -1.667 | 1.667 | 3.43 |
| A_51_P179504  | Ang3          | NM_001123394 | predicted gene, EG630952                                                                  | -1.667 | 1.667 | 7.92 |
| A_52_P287839  | Ccdc28a       | NM_144820    | coiled-coil domain containing 28A                                                         | -1.667 | 1.667 | 4.2  |
| A_51_P114002  | Gstm7         | AK002213     | glutathione S-transferase, mu 7                                                           | -1.667 | 1.667 | 4.44 |
| A_52_P237077  | Esr1          | NM_007956    | estrogen receptor 1 (alpha)                                                               | -1.664 | 1.664 | 4.96 |
| A_52_P237077  | Esr1          | NM_007956    | estrogen receptor 1 (alpha)                                                               | -1.664 | 1.664 | 4.44 |
| A_52_P189038  | Rbms1         | NM_020296    | RNA binding motif, single stranded interacting protein 1                                  | -1.664 | 1.664 | 6.58 |
| A_52_P97670   | Atad2b        | NM_001099628 | ATPase family, AAA domain containing 2B                                                   | -1.661 | 1.661 | 6.58 |
| A_51_P345792  | Tmem180       | NM_029186    | transmembrane protein 180                                                                 | -1.661 | 1.661 | 4.44 |
| A_52_P163820  | 2810006K23Rik | NM_028310    | RIKEN cDNA 2810006K23 gene                                                                | -1.661 | 1.661 | 4.2  |
| A_52_P25774   | Grm8          | NM_008174    | glutamate receptor, metabotropic 8                                                        | -1.661 | 1.661 | 9.3  |
| A_51_P288592  | BE953138      | BE953138     |                                                                                           | -1.661 | 1.661 | 3.45 |
| A_52_P314181  | AK040606      | AK040606     |                                                                                           | -1.661 | 1.661 | 7.92 |
| A_52_P112676  | Ccdc28b       | NM_025455    | coiled coil domain containing 28B                                                         | -1.661 | 1.661 | 6.58 |
| A_51_P168439  | Klhl24        | AK004187     | kelch-like 24 (Drosophila)                                                                | -1.658 | 1.658 | 6.58 |
| A_52_P599736  | Arhgef10l     | NM_172415    | Rho guanine nucleotide exchange factor (GEF) 10-like                                      | -1.658 | 1.658 | 4.44 |
| A_51_P175758  | 9430023L20Rik | NM_026566    | RIKEN cDNA 9430023L20 gene                                                                | -1.658 | 1.658 | 6.58 |
| A_51_P126484  | Myo1b         | NM_010863    | myosin IB                                                                                 | -1.658 | 1.658 | 2.56 |
| A_52_P679966  | Slmap         | NM_032008    | sarcolemma associated protein                                                             | -1.656 | 1.656 | 7.92 |
| A_51_P454949  | Gstm3         | NM_010359    | glutathione S-transferase, mu 3                                                           | -1.656 | 1.656 | 9.3  |
| A_52_P626438  | NAP031829-1   | NAP031829-1  |                                                                                           | -1.656 | 1.656 | 2.56 |
| A_51_P275407  | Phactr2       | NM_001033257 | phosphatase and actin regulator 2                                                         | -1.653 | 1.653 | 3.45 |
| A_51_P466828  | Fam109a       | AK039192     | RIKEN cDNA A230106M15 gene                                                                | -1.653 | 1.653 | 4.96 |
| A_51_P159896  | Dnajc1        | NM_007869    | DnaJ (Hsp40) homolog, subfamily C, member 1                                               | -1.653 | 1.653 | 4.96 |
| A_51_P404193  | Sp5           | NM_022435    | trans-acting transcription factor 5                                                       | -1.653 | 1.653 | 6.58 |
| A_52_P1139491 | 4930588G05Rik | AK019832     | RIKEN cDNA 4930588G05 gene                                                                | -1.653 | 1.653 | 4.2  |
| A_51_P309854  | Kcnn2         | NM_080465    | potassium intermediate/small conductance calcium-activated channel, subfamily N, member 2 | -1.65  | 1.65  | 3.43 |
| A_51_P265695  | Gapdhs        | NM_008085    | glyceraldehyde-3-phosphate dehydrogenase, spermatogenic                                   | -1.65  | 1.65  | 6.58 |
| A_51_P143805  | Tmem42        | NM_025339    | transmembrane protein 42                                                                  | -1.65  | 1.65  | 3.43 |
| A_52_P635338  | Fes           | NM_010194    | feline sarcoma oncogene                                                                   | -1.65  | 1.65  | 4.96 |
| A_51_P161682  | Coq7          | NM_009940    | demethyl-Q 7                                                                              | -1.65  | 1.65  | 4.44 |
| A_52_P290090  | Stbd1         | AK021293     | DNA segment, Chr 5, ERATO Doi 593, expressed                                              | -1.65  | 1.65  | 4.96 |
| A_52_P292213  | E130203B14Rik | NM_178791    | RIKEN cDNA E130203B14 gene                                                                | -1.65  | 1.65  | 4.96 |
| A_51_P383599  | Golgb1        | NM_030035    | golgi autoantigen, golgin subfamily b, macrogolgin 1                                      | -1.65  | 1.65  | 4.2  |
| A_52_P24439   | Sftpa1        | NM_023134    | surfactant associated protein A1                                                          | -1.65  | 1.65  | 3.43 |
| A_51_P406105  | Rps4y2        | NR_003634    | RIKEN cDNA 1110033J19 gene                                                                | -1.65  | 1.65  | 5.56 |
| A_51_P126476  | Myo1b         | NM_010863    | myosin IB                                                                                 | -1.647 | 1.647 | 3.43 |
| A_51_P470295  | BG073133      | BG073133     | developmentally regulated repeat element-containing transcript 1                          | -1.647 | 1.647 | 4.2  |
| A_51_P181297  | Serpnb1a      | NM_025429    | serine (or cysteine) peptidase inhibitor, clade B, member 1a                              | -1.647 | 1.647 | 6.58 |
| A_51_P358243  | 2610029I01Rik | NM_029840    | RIKEN cDNA 2610029I01 gene                                                                | -1.647 | 1.647 | 6.58 |
| A_51_P261999  | 2410075B13Rik | NM_001163518 | RIKEN cDNA 2410075B13 gene                                                                | -1.645 | 1.645 | 4.96 |
| A_51_P256323  | Lpin2         | NM_001164885 | lipin 2                                                                                   | -1.645 | 1.645 | 4.2  |
| A_51_P136303  | Cyp4f15       | NM_134127    | cytochrome P450, family 4, subfamily f, polypeptide 15                                    | -1.642 | 1.642 | 5.56 |
| A_52_P60519   | D19ErtD737e   | NM_029648    | DNA segment, Chr 19, ERATO Doi 737, expressed                                             | -1.642 | 1.642 | 4.96 |
| A_52_P488074  | Wac           | NM_153085    | WW domain containing adaptor with coiled-coil                                             | -1.642 | 1.642 | 7.92 |

|              |               |              |                                                                                                            |        |       |      |
|--------------|---------------|--------------|------------------------------------------------------------------------------------------------------------|--------|-------|------|
| A_51_P469724 | V1rb8         | NM_053229    | vomeronal 1 receptor, B8                                                                                   | -1.642 | 1.642 | 3.45 |
| A_51_P231072 | Clec2h        | NM_053165    | C-type lectin domain family 2, member h                                                                    | -1.642 | 1.642 | 6.58 |
| A_51_P309854 | Kcnn2         | NM_080465    | potassium intermediate/small conductance calcium-activated channel, subfamily N, member 2                  | -1.642 | 1.642 | 3.43 |
| A_52_P380649 | Prkri         | NM_028410    | protein-kinase, interferon-inducible double stranded RNA dependent inhibitor, repressor of (P58 repressor) | -1.639 | 1.639 | 3.45 |
| A_52_P275354 | Osbpl7        | NM_001081434 | oxysterol binding protein-like 7                                                                           | -1.639 | 1.639 | 6.58 |
| A_51_P323521 | Snx21         | NM_133924    | sorting nexin family member 21                                                                             | -1.639 | 1.639 | 7.92 |
| A_51_P309854 | Kcnn2         | NM_080465    | potassium intermediate/small conductance calcium-activated channel, subfamily N, member 2                  | -1.637 | 1.637 | 3.43 |
| A_51_P133612 | Cdt1          | NM_026014    | chromatin licensing and DNA replication factor 1                                                           | -1.637 | 1.637 | 5.56 |
| A_51_P111164 | Rnd1          | NM_172612    | Rho family GTPase 1                                                                                        | -1.634 | 1.634 | 9.3  |
| A_52_P398730 | C87414        | NM_001164284 | expressed sequence AA792892                                                                                | -1.634 | 1.634 | 6.58 |
| A_51_P151070 | Gm9971        | AK046642     | predicted gene, ENSMUSG00000055440                                                                         | -1.634 | 1.634 | 9.3  |
| A_51_P511546 | Gldc          | NM_138595    | glycine decarboxylase                                                                                      | -1.634 | 1.634 | 5.56 |
| A_51_P114005 | Gstm7         | NM_026672    | glutathione S-transferase, mu 7                                                                            | -1.634 | 1.634 | 3.45 |
| A_52_P491842 | Brd3          | NM_023336    | bromodomain containing 3                                                                                   | -1.634 | 1.634 | 3.45 |
| A_51_P293753 | Cul7          | NM_025611    | cullin 7                                                                                                   | -1.631 | 1.631 | 9.3  |
| A_51_P393426 | Pros1         | NM_011173    | protein S (alpha)                                                                                          | -1.631 | 1.631 | 7.92 |
| A_51_P183261 | Aqp8          | NM_007474    | aquaporin 8                                                                                                | -1.631 | 1.631 | 5.56 |
| A_52_P434549 | Acin1         | NM_023190    | apoptotic chromatin condensation inducer 1                                                                 | -1.629 | 1.629 | 4.96 |
| A_51_P491329 | Pdzk1ip1      | NM_026018    | PDZK1 interacting protein 1                                                                                | -1.629 | 1.629 | 2.32 |
| A_52_P156110 | lkbkg         | NM_001136067 | inhibitor of kappaB kinase gamma                                                                           | -1.629 | 1.629 | 4.96 |
| A_52_P253317 | 4930481A15Rik | NR_027939    | RIKEN cDNA 4930481A15 gene                                                                                 | -1.626 | 1.626 | 6.58 |
| A_52_P640922 | Dcdc2a        | NM_177577    | doublecortin domain containing 2a                                                                          | -1.626 | 1.626 | 3.45 |
| A_52_P245059 | Sgsm2         | NM_197943    | RUN and TBC1 domain containing 1                                                                           | -1.626 | 1.626 | 7.92 |
| A_52_P193440 | E130102H24Rik | XM_001472210 | RIKEN cDNA E130102H24 gene                                                                                 | -1.626 | 1.626 | 9.3  |
| A_51_P309854 | Kcnn2         | NM_080465    | potassium intermediate/small conductance calcium-activated channel, subfamily N, member 2                  | -1.626 | 1.626 | 3.45 |
| A_51_P454696 | Mosc1         | NM_001081361 | MOCO sulphurase C-terminal domain containing 1                                                             | -1.626 | 1.626 | 6.58 |
| A_51_P466829 | Fam109a       | NM_175474    | RIKEN cDNA A230106M15 gene                                                                                 | -1.623 | 1.623 | 5.56 |
| A_52_P28624  | Gm3346        | XM_001477617 | hypothetical protein LOC671950                                                                             | -1.623 | 1.623 | 4.2  |
| A_51_P336790 | Lsm5          | NM_025520    | LSM5 homolog, U6 small nuclear RNA associated (S. cerevisiae)                                              | -1.623 | 1.623 | 3.43 |
| A_52_P280821 | NAP123201-1   | NAP123201-1  |                                                                                                            | -1.623 | 1.623 | 3.43 |
| A_52_P346367 | Ddx42         | NM_028074    | DEAD (Asp-Glu-Ala-Asp) box polypeptide 42                                                                  | -1.623 | 1.623 | 4.96 |
| A_51_P409173 | Ldhd          | NM_008492    | lactate dehydrogenase B                                                                                    | -1.623 | 1.623 | 3.45 |
| A_51_P246339 | Rfc5          | NM_028128    | replication factor C (activator 1) 5                                                                       | -1.621 | 1.621 | 5.56 |
| A_52_P177988 | Fam179b       | NM_177805    | RIKEN cDNA A430041B07 gene                                                                                 | -1.621 | 1.621 | 5.56 |
| A_51_P141660 | Dmx2          | NM_172771    | Dmx-like 2                                                                                                 | -1.621 | 1.621 | 5.56 |
| A_51_P202050 | Dtx1          | NM_008052    | deltex 1 homolog (Drosophila)                                                                              | -1.621 | 1.621 | 4.96 |
| A_52_P197179 | NAP040732-1   | NAP040732-1  |                                                                                                            | -1.621 | 1.621 | 4.96 |
| A_51_P262773 | Cdh2          | NM_007664    | cadherin 2                                                                                                 | -1.618 | 1.618 | 4.2  |
| A_52_P135392 | Uck2          | BC004016     | uridine-cytidine kinase 2                                                                                  | -1.618 | 1.618 | 3.45 |
| A_52_P172691 | 4732465E10Rik | AK028870     | RIKEN cDNA 4732465E10 gene                                                                                 | -1.618 | 1.618 | 6.58 |
| A_51_P268514 | 6820445E23Rik | AK135532     | predicted gene, ENSMUSG00000073100                                                                         | -1.618 | 1.618 | 5.56 |
| A_52_P289835 | Foxn3         | NM_183186    | checkpoint suppressor 1                                                                                    | -1.618 | 1.618 | 7.92 |
| A_51_P162773 | Sccpdh        | NM_178653    | saccharopine dehydrogenase (putative)                                                                      | -1.618 | 1.618 | 3.43 |
| A_52_P365721 | Senp6         | NM_146003    | SUMO/sentrin specific peptidase 6                                                                          | -1.616 | 1.616 | 6.58 |
| A_52_P418014 | Akt1          | NM_009652    | thymoma viral proto-oncogene 1                                                                             | -1.616 | 1.616 | 9.3  |
| A_51_P448946 | Sertad2       | NM_021372    | SERTA domain containing 2                                                                                  | -1.613 | 1.613 | 4.96 |
| A_51_P201971 | Setd8         | NM_030241    | SET domain containing (lysine methyltransferase) 8                                                         | -1.613 | 1.613 | 7.92 |
| A_52_P57686  | Ccdc28a       | NM_144820    | coiled-coil domain containing 28A                                                                          | -1.61  | 1.61  | 4.96 |

|              |                    |                    |                                                                                           |        |       |      |
|--------------|--------------------|--------------------|-------------------------------------------------------------------------------------------|--------|-------|------|
| A_51_P230103 | Birc5              | NM_001012273       | baculoviral IAP repeat-containing 5                                                       | -1.61  | 1.61  | 6.58 |
| A_52_P335089 | 6820431F20Rik      | NR_028428          | RIKEN cDNA 6820431F20 gene                                                                | -1.61  | 1.61  | 4.96 |
| A_52_P131353 | Camk1d             | NM_177343          | calcium/calmodulin-dependent protein kinase ID                                            | -1.61  | 1.61  | 4.2  |
| A_52_P69867  | Ppme1              | NM_028292          | protein phosphatase methylesterase 1                                                      | -1.61  | 1.61  | 5.56 |
| A_51_P117739 | Figf               | NM_010216          | c-fos induced growth factor                                                               | -1.608 | 1.608 | 7.92 |
| A_51_P428754 | Grik5              | NM_008168          | glutamate receptor, ionotropic, kainate 5 (gamma 2)                                       | -1.608 | 1.608 | 5.56 |
| A_51_P309854 | Kcnn2              | NM_080465          | potassium intermediate/small conductance calcium-activated channel, subfamily N, member 2 | -1.608 | 1.608 | 3.43 |
| A_52_P18897  | Bclaf1             | NM_001025393       | BCL2-associated transcription factor 1                                                    | -1.608 | 1.608 | 4.96 |
| A_51_P366161 | Mpg                | NM_010822          | N-methylpurine-DNA glycosylase                                                            | -1.608 | 1.608 | 9.3  |
| A_52_P339722 | Cskn1a1            | NM_146087          | casein kinase 1, alpha 1                                                                  | -1.608 | 1.608 | 5.56 |
| A_51_P228385 | Pum2               | NM_030723          | pumilio 2 (Drosophila)                                                                    | -1.605 | 1.605 | 4.2  |
| A_51_P306892 | Pqlc2              | NM_145384          | PQ loop repeat containing 2                                                               | -1.605 | 1.605 | 3.45 |
| A_52_P324825 | Tspan9             | NM_175414          | tetraspanin 9                                                                             | -1.605 | 1.605 | 5.56 |
| A_51_P318262 | Hao1               | AF104312           | hydroxyacid oxidase 1, liver                                                              | -1.603 | 1.603 | 4.44 |
| A_51_P446477 | Cldnd1             | NM_171826          | claudin domain containing 1                                                               | -1.6   | 1.6   | 7.92 |
| A_51_P502964 | Tmem63a            | NM_144794          | transmembrane protein 63a                                                                 | -1.6   | 1.6   | 4.44 |
| A_52_P18775  | Cyb5rl             | NM_175471          | RIKEN cDNA 2810410C14 gene                                                                | -1.6   | 1.6   | 3.45 |
| A_51_P518592 | Atxn7              | NM_139227          | ataxin 7                                                                                  | -1.6   | 1.6   | 9.3  |
| A_51_P291501 | Ccno               | NM_001081062       | cyclin U                                                                                  | -1.6   | 1.6   | 5.56 |
| A_52_P541270 | Crebl2             | NM_177687          | cAMP responsive element binding protein-like 2                                            | -1.6   | 1.6   | 4.2  |
| A_52_P629333 | BC021891           | NM_145608          | cDNA sequence BC021891                                                                    | -1.597 | 1.597 | 9.3  |
| A_52_P313607 | NAP108117-1        | NAP108117-1        |                                                                                           | -1.597 | 1.597 | 5.56 |
| A_52_P134874 | Rnf214             | AK050638           | ring finger protein 214                                                                   | -1.597 | 1.597 | 5.56 |
| A_51_P265695 | Gapdhs             | NM_008085          | glyceraldehyde-3-phosphate dehydrogenase, spermatogenic                                   | -1.597 | 1.597 | 4.96 |
| A_51_P268673 | 2210016H18Rik      | AK008737           | RIKEN cDNA 2210016H18 gene                                                                | -1.597 | 1.597 | 9.3  |
| A_51_P306109 | AK019683           | AK019683           |                                                                                           | -1.597 | 1.597 | 5.56 |
| A_51_P284665 | Plcb1              | U85712             | phospholipase C, beta 1                                                                   | -1.595 | 1.595 | 5.56 |
| A_51_P265905 | Zranb3             | NM_027678          | zinc finger, RAN-binding domain containing 3                                              | -1.595 | 1.595 | 3.45 |
| A_52_P639223 | Bche               | NM_009738          | butyrylcholinesterase                                                                     | -1.595 | 1.595 | 6.58 |
| A_52_P95740  | AI316807           | NM_001012667       | expressed sequence AI316807                                                               | -1.595 | 1.595 | 4.44 |
| A_52_P481097 | AK086528           | AK086528           |                                                                                           | -1.595 | 1.595 | 2.56 |
| A_51_P480709 | Ywhaz              | NM_011740          | tyrosine 3-monooxygenase/tryptophan 5-monooxygenase activation protein, zeta polypeptide  | -1.595 | 1.595 | 4.96 |
| A_52_P382565 | NAP101987-1        | NAP101987-1        | similar to putative retrovirus-related gag protein                                        | -1.595 | 1.595 | 9.3  |
| A_51_P191893 | ENSMUST00000095785 | ENSMUST00000095785 | RIKEN cDNA 2410022M11 gene                                                                | -1.595 | 1.595 | 7.92 |
| A_51_P391159 | Ang                | NM_007447          | angiogenin, ribonuclease A family, member 1                                               | -1.592 | 1.592 | 9.3  |
| A_52_P408315 | ENSMUST00000055564 | ENSMUST00000055564 | RIKEN cDNA A230074B11 gene                                                                | -1.592 | 1.592 | 9.3  |
| A_51_P398887 | Ctns               | NM_031251          | cystinosis, nephropathic                                                                  | -1.592 | 1.592 | 9.3  |
| A_52_P396774 | 2700094K13Rik      | NM_001037279       | RIKEN cDNA 2700094K13 gene                                                                | -1.592 | 1.592 | 5.56 |
| A_51_P158400 | Rc3h2              | NM_001100591       | ring finger and CCCH-type zinc finger domains 2                                           | -1.59  | 1.59  | 4.44 |
| A_51_P305547 | Snai2              | NM_011415          | snail homolog 2 (Drosophila)                                                              | -1.59  | 1.59  | 7.92 |
| A_52_P187565 | LOC100038980       | XM_001472087       |                                                                                           | -1.59  | 1.59  | 4.96 |
| A_51_P406105 | Rps4y2             | NR_003634          | RIKEN cDNA 1110033J19 gene                                                                | -1.59  | 1.59  | 5.56 |
| A_51_P367947 | Arhgap29           | NM_172525          | Rho GTPase activating protein 29                                                          | -1.59  | 1.59  | 5.56 |
| A_52_P102115 | AK013994           | AK013994           |                                                                                           | -1.59  | 1.59  | 6.58 |
| A_51_P385086 | Thpo               | NM_009379          | thrombopoietin                                                                            | -1.59  | 1.59  | 4.2  |
| A_52_P135398 | NAP031874-1        | NAP031874-1        |                                                                                           | -1.587 | 1.587 | 3.45 |
| A_52_P369415 | Rcan2              | NM_207649          | Down syndrome critical region gene 1-like 1                                               | -1.587 | 1.587 | 4.2  |

|              |               |              |                                                                                     |        |       |      |
|--------------|---------------|--------------|-------------------------------------------------------------------------------------|--------|-------|------|
| A_52_P545010 | Slc39a11      | NM_027216    | solute carrier family 39 (metal ion transporter), member 11                         | -1.585 | 1.585 | 4.96 |
| A_51_P235580 | Dap3          | NM_022994    | death associated protein 3                                                          | -1.585 | 1.585 | 2.56 |
| A_52_P965217 | TC1691788     | TC1691788    |                                                                                     | -1.585 | 1.585 | 7.92 |
| A_51_P330717 | Spop          | NM_025287    | speckle-type POZ protein                                                            | -1.582 | 1.582 | 5.56 |
| A_51_P508402 | Mical2        | NM_177282    | microtubule associated monooxygenase, calponin and LIM domain containing 2          | -1.582 | 1.582 | 9.3  |
| A_51_P485683 | Trappc6a      | NM_025960    | trafficking protein particle complex 6A                                             | -1.582 | 1.582 | 3.45 |
| A_52_P640512 | Ablim3        | NM_198649    | actin binding LIM protein family, member 3                                          | -1.582 | 1.582 | 7.92 |
| A_52_P491961 | Ccdc25        | NM_145944    | coiled-coil domain containing 25                                                    | -1.582 | 1.582 | 5.56 |
| A_52_P222073 | Ccbp2         | NM_021609    | chemokine binding protein 2                                                         | -1.58  | 1.58  | 6.58 |
| A_51_P147651 | Ccdc15        | NM_001081429 | coiled-coil domain containing 15                                                    | -1.58  | 1.58  | 7.92 |
| A_52_P571371 | Tmem144       | NM_027495    | transmembrane protein 144                                                           | -1.577 | 1.577 | 5.56 |
| A_51_P464738 | Slc2a1        | NM_011400    | solute carrier family 2 (facilitated glucose transporter), member 1                 | -1.577 | 1.577 | 9.3  |
| A_51_P215815 | Atp11c        | NM_001037863 | ATPase, class VI, type 11C                                                          | -1.577 | 1.577 | 6.58 |
| A_51_P406105 | Rps4y2        | NR_003634    | RIKEN cDNA 1110033J19 gene                                                          | -1.577 | 1.577 | 5.56 |
| A_51_P114563 | Rhbdd3        | NM_177370    | rhomboid domain containing 3                                                        | -1.577 | 1.577 | 7.92 |
| A_51_P384113 | 9330129D05Rik | NM_178799    | RIKEN cDNA 9330129D05 gene                                                          | -1.577 | 1.577 | 5.56 |
| A_51_P437938 | 6330578E17Rik | NM_198006    | RIKEN cDNA 6330578E17 gene                                                          | -1.577 | 1.577 | 4.44 |
| A_51_P318580 | Myh14         | NM_028021    | myosin, heavy polypeptide 14                                                        | -1.577 | 1.577 | 6.58 |
| A_51_P273928 | AK039851      | AK039851     |                                                                                     | -1.575 | 1.575 | 3.45 |
| A_51_P406105 | Rps4y2        | NR_003634    | RIKEN cDNA 1110033J19 gene                                                          | -1.575 | 1.575 | 5.56 |
| A_52_P589509 | Scaper        | NM_001081341 | zinc finger protein 291                                                             | -1.575 | 1.575 | 5.56 |
| A_51_P215438 | Prodh         | NM_011172    | proline dehydrogenase                                                               | -1.572 | 1.572 | 9.3  |
| A_51_P483059 | Dicer1        | NM_148948    | Dicer1, Dcr-1 homolog (Drosophila)                                                  | -1.572 | 1.572 | 5.56 |
| A_51_P169567 | Nfkbil1       | NM_010909    | nuclear factor of kappa light polypeptide gene enhancer in B-cells inhibitor-like 1 | -1.572 | 1.572 | 6.58 |
| A_51_P406105 | Rps4y2        | NR_003634    | RIKEN cDNA 1110033J19 gene                                                          | -1.572 | 1.572 | 4.96 |
| A_51_P301289 | Atp5k         | NM_007507    | ATP synthase, H <sup>+</sup> transporting, mitochondrial F1F0 complex, subunit e    | -1.572 | 1.572 | 3.45 |
| A_52_P616996 | Ube2q2        | NM_180600    | ubiquitin-conjugating enzyme E2Q (putative) 2                                       | -1.57  | 1.57  | 4.96 |
| A_52_P202367 | Gm10319       | NR_003624    | predicted gene, EG381806                                                            | -1.57  | 1.57  | 4.44 |
| A_51_P406105 | Rps4y2        | NR_003634    | RIKEN cDNA 1110033J19 gene                                                          | -1.57  | 1.57  | 4.96 |
| A_51_P158388 | Cdk19         | NM_198164    | cell division cycle 2-like 6 (CDK8-like)                                            | -1.57  | 1.57  | 6.58 |
| A_51_P398596 | Tnrc6b        | NM_144812    | trinucleotide repeat containing 6b                                                  | -1.567 | 1.567 | 5.56 |
| A_51_P356942 | Trim55        | NM_001081281 | tripartite motif-containing 55                                                      | -1.567 | 1.567 | 4.96 |
| A_52_P142496 | Herc1         | NM_145617    |                                                                                     | -1.567 | 1.567 | 5.56 |
| A_51_P303160 | Arg1          | NM_007482    | arginase 1, liver                                                                   | -1.567 | 1.567 | 5.56 |
| A_52_P187987 | 2310001H17Rik | AK009064     | RIKEN cDNA 2310001H17 gene                                                          | -1.567 | 1.567 | 5.56 |
| A_51_P127607 | Ppp2r5e       | NM_012024    | protein phosphatase 2, regulatory subunit B (B56), epsilon isoform                  | -1.565 | 1.565 | 7.92 |
| A_51_P219532 | 1110003O08Rik | AK003388     | RIKEN cDNA 1110003O08 gene                                                          | -1.565 | 1.565 | 6.58 |
| A_51_P383369 | Odz3          | NM_011857    | odd Oz/ten-m homolog 3 (Drosophila)                                                 | -1.565 | 1.565 | 7.92 |
| A_52_P459399 | Tnrc6b        | NM_177124    | trinucleotide repeat containing 6b                                                  | -1.565 | 1.565 | 6.58 |
| A_52_P467805 | Sfxn2         | NM_053196    | sideroflexin 2                                                                      | -1.565 | 1.565 | 6.58 |
| A_51_P323812 | Slc6a12       | NM_133661    | solute carrier family 6 (neurotransmitter transporter, betaine/GABA), member 12     | -1.562 | 1.562 | 6.58 |
| A_52_P485939 | Slc39a8       | NM_026228    | solute carrier family 39 (metal ion transporter), member 8                          | -1.562 | 1.562 | 4.44 |
| A_51_P111655 | Snhg11        | NM_175692    | RIKEN cDNA A930034L06 gene                                                          | -1.562 | 1.562 | 5.56 |
| A_51_P236829 | Zswim7        | NM_027198    | RIKEN cDNA 2410012H22 gene                                                          | -1.562 | 1.562 | 2.56 |
| A_52_P505907 | Gigyf2        | NM_146112    | trinucleotide repeat containing 15                                                  | -1.562 | 1.562 | 7.92 |
| A_52_P43326  | Rgs4          | NM_009062    | regulator of G-protein signaling 4                                                  | -1.56  | 1.56  | 7.92 |

|              |               |                    |                                                                                          |        |       |      |
|--------------|---------------|--------------------|------------------------------------------------------------------------------------------|--------|-------|------|
| A_51_P406105 | Rps4y2        | NR_003634          | RIKEN cDNA 1110033J19 gene                                                               | -1.56  | 1.56  | 5.56 |
| A_51_P336491 | Csnk1a1       | NM_146087          | casein kinase 1, alpha 1                                                                 | -1.56  | 1.56  | 5.56 |
| A_51_P483544 | Aass          | NM_013930          | aminoadipate-semialdehyde synthase                                                       | -1.56  | 1.56  | 4.96 |
| A_51_P368496 | Tmem98        | NM_029537          | transmembrane protein 98                                                                 | -1.56  | 1.56  | 6.58 |
| A_52_P456898 | Lactb         | NM_030717          | lactamase, beta                                                                          | -1.558 | 1.558 | 6.58 |
| A_52_P558601 | Rb1cc1        | NM_009826          | RB1-inducible coiled-coil 1                                                              | -1.558 | 1.558 | 6.58 |
| A_52_P100293 | 4930526I15Rik | NR_015516          | RIKEN cDNA 4930526I15 gene                                                               | -1.558 | 1.558 | 4.44 |
| A_52_P214630 | Sox9          | NM_011448          | SRY-box containing gene 9                                                                | -1.558 | 1.558 | 9.3  |
| A_52_P358963 | Hmg20b        | NM_010440          | high mobility group 20 B                                                                 | -1.558 | 1.558 | 4.44 |
| A_51_P308298 | Myl9          | NM_172118          | myosin, light polypeptide 9, regulatory                                                  | -1.555 | 1.555 | 4.44 |
| A_52_P137829 | 4930402E16Rik | ENSMUST00000039333 | RIKEN cDNA 4930402E16 gene                                                               | -1.555 | 1.555 | 6.58 |
| A_52_P9347   | Ddx23         | NM_001080981       | DEAD (Asp-Glu-Ala-Asp) box polypeptide 23                                                | -1.555 | 1.555 | 4.44 |
| A_51_P159902 | AU042671      | XM_132325          | expressed sequence AU042671                                                              | -1.555 | 1.555 | 4.2  |
| A_52_P351574 | Plcb1         | NM_019677          | phospholipase C, beta 1                                                                  | -1.553 | 1.553 | 7.92 |
| A_51_P219109 | Il12rb1       | NM_008353          | interleukin 12 receptor, beta 1                                                          | -1.553 | 1.553 | 9.3  |
| A_51_P406105 | Rps4y2        | NR_003634          | RIKEN cDNA 1110033J19 gene                                                               | -1.553 | 1.553 | 5.56 |
| A_52_P270446 | Taok1         | NM_144825          | TAO kinase 1                                                                             | -1.553 | 1.553 | 6.58 |
| A_52_P677956 | Pex11c        | NM_026951          | peroxisomal biogenesis factor 11c                                                        | -1.553 | 1.553 | 3.45 |
| A_51_P406105 | Rps4y2        | NR_003634          | RIKEN cDNA 1110033J19 gene                                                               | -1.553 | 1.553 | 4.96 |
| A_51_P193130 | Mrpl23        | NM_011288          | mitochondrial ribosomal protein L23                                                      | -1.55  | 1.55  | 3.45 |
| A_51_P174176 | Serpinf2      | NM_008878          | serine (or cysteine) peptidase inhibitor, clade F, member 2                              | -1.55  | 1.55  | 9.3  |
| A_51_P140641 | Fam176a       | NM_145570          | transmembrane protein 166                                                                | -1.55  | 1.55  | 4.96 |
| A_51_P429197 | Csnk1e        | NM_013767          | casein kinase 1, epsilon                                                                 | -1.55  | 1.55  | 3.43 |
| A_51_P475785 | BC052040      | NM_207264          | cDNA sequence BC052040                                                                   | -1.548 | 1.548 | 7.92 |
| A_52_P52156  | Isoc2a        | NM_001101598       | isochorismatase domain containing 2a                                                     | -1.548 | 1.548 | 5.56 |
| A_51_P406105 | Rps4y2        | NR_003634          | RIKEN cDNA 1110033J19 gene                                                               | -1.548 | 1.548 | 6.58 |
| A_51_P484842 | Asgr2         | NM_007493          | asialoglycoprotein receptor 2                                                            | -1.548 | 1.548 | 4.44 |
| A_52_P346256 | Ptcd3         | NM_027275          | Pentatricopeptide repeat domain 3                                                        | -1.546 | 1.546 | 9.3  |
| A_52_P320279 | Inca1         | NM_213729          | expressed sequence AI842396                                                              | -1.546 | 1.546 | 4.44 |
| A_51_P212515 | Ppm1l         | NM_178726          | protein phosphatase 1 (formerly 2C)-like                                                 | -1.546 | 1.546 | 5.56 |
| A_52_P445382 | Dnajc25       | NM_001033165       | RIKEN cDNA 2010203O07 gene                                                               | -1.546 | 1.546 | 6.58 |
| A_51_P308048 | Cmtm8         | NM_027294          | CKLF-like MARVEL transmembrane domain containing 8                                       | -1.543 | 1.543 | 9.3  |
| A_52_P214630 | Sox9          | NM_011448          | SRY-box containing gene 9                                                                | -1.543 | 1.543 | 9.3  |
| A_52_P309177 | Zhx1          | NM_001042438       | zinc fingers and homeoboxes protein 1                                                    | -1.543 | 1.543 | 6.58 |
| A_51_P504624 | Slc24a6       | NM_133221          | solute carrier family 24 (sodium/potassium/calcium exchanger), member 6                  | -1.543 | 1.543 | 6.58 |
| A_52_P11395  | Fam123b       | NM_175179          | RIKEN cDNA 2810002O09 gene                                                               | -1.543 | 1.543 | 4.96 |
| A_52_P303862 | Baz2a         | NM_054078          | bromodomain adjacent to zinc finger domain, 2A                                           | -1.543 | 1.543 | 3.45 |
| A_51_P517215 | Grb14         | NM_016719          | growth factor receptor bound protein 14                                                  | -1.543 | 1.543 | 7.92 |
| A_52_P449199 | Dyrk1b        | NM_001037957       | dual-specificity tyrosine-(Y)-phosphorylation regulated kinase 1b                        | -1.541 | 1.541 | 9.3  |
| A_52_P581138 | Ctdspl2       | NM_212450          | CTD (carboxy-terminal domain, RNA polymerase II, polypeptide A) small phosphatase like 2 | -1.541 | 1.541 | 9.3  |
| A_51_P393748 | Ddx58         | NM_172689          | DEAD (Asp-Glu-Ala-Asp) box polypeptide 58                                                | -1.538 | 1.538 | 9.3  |
| A_51_P482070 | Hist1h4d      | NM_175654          | histone cluster 1, H4d                                                                   | -1.538 | 1.538 | 9.3  |
| A_52_P329164 | D130020L05Rik | AK087910           | RIKEN cDNA D130020L05 gene                                                               | -1.536 | 1.536 | 3.45 |
| A_51_P142046 | 1810049H13Rik | NM_025560          | RIKEN cDNA 1810049H13 gene                                                               | -1.536 | 1.536 | 9.3  |
| A_52_P780667 | Rps4x         | BE915090           | ribosomal protein S4, X-linked                                                           | -1.536 | 1.536 | 6.58 |
| A_52_P534355 | Anxa7         | AK041855           |                                                                                          | -1.534 | 1.534 | 6.58 |
| A_51_P359333 | Fh1           | BC006048           | fumarate hydratase 1                                                                     | -1.534 | 1.534 | 6.58 |



|               |                    |                    |                                                                                         |        |       |      |
|---------------|--------------------|--------------------|-----------------------------------------------------------------------------------------|--------|-------|------|
| A_52_P1188723 | AK086376           | AK086376           |                                                                                         | -1.534 | 1.534 | 7.92 |
| A_51_P396852  | Gsto2              | NM_026619          | glutathione S-transferase omega 2                                                       | -1.534 | 1.534 | 6.58 |
| A_51_P344301  | Svil               | AK021019           | supervillin                                                                             | -1.534 | 1.534 | 5.56 |
| A_51_P497484  | Al118078           | NM_172923          | expressed sequence Al118078                                                             | -1.531 | 1.531 | 5.56 |
| A_51_P296456  | Ankrd11            | NM_001081379       | ankyrin repeat domain 11                                                                | -1.531 | 1.531 | 7.92 |
| A_52_P463235  | Ankrd33b           | NM_027496          | RIKEN cDNA 5730557B15 gene                                                              | -1.531 | 1.531 | 6.58 |
| A_52_P620432  | Fam82b             | AK019968           | RIKEN cDNA 2410005O16 gene                                                              | -1.531 | 1.531 | 7.92 |
| A_51_P170795  | Dcaf12l1           | NM_178739          | WD repeat domain 40B                                                                    | -1.531 | 1.531 | 3.43 |
| A_51_P138760  | Abcd4              | NM_008992          | ATP-binding cassette, sub-family D (ALD), member 4                                      | -1.531 | 1.531 | 5.56 |
| A_52_P498608  | Hmgn5              | NM_016710          | nucleosome binding protein 1                                                            | -1.531 | 1.531 | 5.56 |
| A_51_P497993  | Gpr155             | AK003760           | G protein-coupled receptor 155                                                          | -1.531 | 1.531 | 7.92 |
| A_51_P268964  | 3100003M19Rik      | AK013928           | RIKEN cDNA 3100003M19 gene                                                              | -1.531 | 1.531 | 6.58 |
| A_51_P328645  | Mapk1ip1l          | NM_178684          | RIKEN cDNA C130032J12 gene                                                              | -1.531 | 1.531 | 9.3  |
| A_52_P355934  | Myo1b              | NM_010863          | myosin IB                                                                               | -1.531 | 1.531 | 5.56 |
| A_52_P14526   | Zyg11b             | NM_001033634       | zyg-11 homolog B (C. elegans)                                                           | -1.531 | 1.531 | 9.3  |
| A_52_P361462  | ENSMUST00000051757 | ENSMUST00000051757 | solute carrier family 26 (sulfate transporter), member 1                                | -1.531 | 1.531 | 4.96 |
| A_51_P469789  | Agxt               | NM_016702          | alanine-glyoxylate aminotransferase                                                     | -1.529 | 1.529 | 9.3  |
| A_52_P115191  | NAP112463-1        | NAP112463-1        |                                                                                         | -1.529 | 1.529 | 5.56 |
| A_51_P473528  | Ahcy               | L32836             | S-adenosylhomocysteine hydrolase                                                        | -1.529 | 1.529 | 4.44 |
| A_51_P230439  | Ppfbp2             | NM_008905          | protein tyrosine phosphatase, receptor-type, F interacting protein, binding protein 2   | -1.529 | 1.529 | 9.3  |
| A_51_P167857  | Appl1              | NM_145221          | adaptor protein, phosphotyrosine interaction, PH domain and leucine zipper containing 1 | -1.529 | 1.529 | 7.92 |
| A_52_P108089  | BC030336           | NM_001164580       | cDNA sequence BC030336                                                                  | -1.529 | 1.529 | 9.3  |
| A_52_P93432   | M88489             | M88489             |                                                                                         | -1.527 | 1.527 | 4.96 |
| A_51_P229536  | Nqo2               | NM_020282          | NAD(P)H dehydrogenase, quinone 2                                                        | -1.527 | 1.527 | 5.56 |
| A_52_P467861  | Prhoxnb            | NM_001039678       | predicted gene, EG231903                                                                | -1.527 | 1.527 | 7.92 |
| A_51_P439711  | Rif1               | NM_175238          | Rap1 interacting factor 1 homolog (yeast)                                               | -1.524 | 1.524 | 6.58 |
| A_52_P374676  | NAP123498-1        | NAP123498-1        |                                                                                         | -1.524 | 1.524 | 7.92 |
| A_51_P241101  | X61497             | X61497             |                                                                                         | -1.524 | 1.524 | 4.96 |
| A_51_P459661  | Lipa               | NM_021460          | lysosomal acid lipase A                                                                 | -1.524 | 1.524 | 9.3  |
| A_51_P331431  | Glt25d2            | NM_177756          | glycosyltransferase 25 domain containing 2                                              | -1.524 | 1.524 | 9.3  |
| A_51_P218814  | Rp122l1            | NM_026517          | ribosomal protein L22 like 1                                                            | -1.524 | 1.524 | 6.58 |
| A_51_P293706  | 2810021B07Rik      | NM_025479          | RIKEN cDNA 2810021B07 gene                                                              | -1.524 | 1.524 | 5.56 |
| A_51_P508510  | Notch1             | Z11886             | Notch gene homolog 1 (Drosophila)                                                       | -1.524 | 1.524 | 9.3  |
| A_52_P563917  | Tmem184a           | NM_144914          | cDNA sequence BC019731                                                                  | -1.522 | 1.522 | 7.92 |
| A_52_P260856  | Lpp                | NM_178665          | LIM domain containing preferred translocation partner in lipoma                         | -1.522 | 1.522 | 6.58 |
| A_52_P216226  | Masp1              | NM_008555          | mannan-binding lectin serine peptidase 1                                                | -1.522 | 1.522 | 4.96 |
| A_51_P471386  | Cdh20              | NM_011800          | cadherin 20                                                                             | -1.522 | 1.522 | 4.2  |
| A_52_P527924  | Slc16a10           | NM_028247          | solute carrier family 16 (monocarboxylic acid transporters), member 10                  | -1.522 | 1.522 | 6.58 |
| A_51_P311379  | Tnrc6a             | NM_144925          | trinucleotide repeat containing 6a                                                      | -1.522 | 1.522 | 4.44 |
| A_52_P477709  | Dek                | NM_025900          | DEK oncogene (DNA binding)                                                              | -1.522 | 1.522 | 4.44 |
| A_52_P684050  | Fam110a            | NM_028666          | RIKEN cDNA 5430432M24 gene                                                              | -1.52  | 1.52  | 7.92 |
| A_52_P142191  | Aph1b              | NM_177583          | anterior pharynx defective 1b homolog (C. elegans)                                      | -1.52  | 1.52  | 6.58 |
| A_51_P226567  | Hsd3b2             | NM_153193          | hydroxy-delta-5-steroid dehydrogenase, 3 beta- and steroid delta-isomerase 2            | -1.52  | 1.52  | 7.92 |
| A_51_P127456  | Lrrc68             | ENSMUST00000058444 | cDNA sequence BC024868                                                                  | -1.52  | 1.52  | 7.92 |
| A_52_P134083  | Cyhr1              | NM_180962          | cysteine and histidine rich 1                                                           | -1.517 | 1.517 | 4.96 |
| A_52_P641195  | 1700029J07Rik      | NM_001033148       | RIKEN cDNA 1700029J07 gene                                                              | -1.517 | 1.517 | 7.92 |

|              |               |                    |                                                                          |        |       |      |
|--------------|---------------|--------------------|--------------------------------------------------------------------------|--------|-------|------|
| A_51_P153565 | Il18          | NM_008360          | interleukin 18                                                           | -1.517 | 1.517 | 9.3  |
| A_51_P326229 | Ddx25         | NM_013932          | DEAD (Asp-Glu-Ala-Asp) box polypeptide 25                                | -1.515 | 1.515 | 5.56 |
| A_51_P103144 | Slco1a1       | AY195869           | solute carrier organic anion transporter family, member 1a1              | -1.515 | 1.515 | 4.96 |
| A_52_P474294 | Iqgap2        | NM_027711          | IQ motif containing GTPase activating protein 2                          | -1.515 | 1.515 | 6.58 |
| A_51_P153565 | Il18          | NM_008360          | interleukin 18                                                           | -1.515 | 1.515 | 7.92 |
| A_51_P153565 | Il18          | NM_008360          | interleukin 18                                                           | -1.515 | 1.515 | 9.3  |
| A_51_P283708 | Msh2          | NM_008628          | mutS homolog 2 (E. coli)                                                 | -1.513 | 1.513 | 6.58 |
| A_51_P271897 | A_51_P271897  | A_51_P271897       | septin 10                                                                | -1.513 | 1.513 | 5.56 |
| A_51_P472879 | Masp1         | ENSMUST00000023605 | mannan-binding lectin serine peptidase 1                                 | -1.513 | 1.513 | 6.58 |
| A_52_P312828 | Rtf1          | NM_030112          | Rtf1, Paf1/RNA polymerase II complex component, homolog (S. cerevisiae)  | -1.513 | 1.513 | 5.56 |
| A_51_P358251 | 2610029I01Rik | NM_029840          | RIKEN cDNA 2610029I01 gene                                               | -1.513 | 1.513 | 4.44 |
| A_51_P438865 | Pmf1          | NM_025928          | polyamine-modulated factor 1                                             | -1.513 | 1.513 | 7.92 |
| A_52_P90124  | Prep          | NM_011156          | prolyl endopeptidase                                                     | -1.513 | 1.513 | 5.56 |
| A_52_P470030 | Kank1         | NM_181404          | ankyrin repeat domain 15                                                 | -1.513 | 1.513 | 9.3  |
| A_51_P456366 | Pard6a        | NM_001047436       | par-6 (partitioning defective 6,) homolog alpha (C. elegans)             | -1.513 | 1.513 | 7.92 |
| A_51_P159402 | Gcat          | NM_013847          | glycine C-acetyltransferase (2-amino-3-ketobutyrate-coenzyme A ligase)   | -1.511 | 1.511 | 6.58 |
| A_51_P405970 | Trrap         | NM_001081362       | transformation/transcription domain-associated protein                   | -1.511 | 1.511 | 5.56 |
| A_52_P322421 | Mpzl2         | NM_007962          | epithelial V-like antigen 1                                              | -1.508 | 1.508 | 9.3  |
| A_51_P399652 | Ccdc151       | NM_029939          | RIKEN cDNA C330001K17 gene                                               | -1.508 | 1.508 | 7.92 |
| A_51_P508510 | Notch1        | Z11886             | Notch gene homolog 1 (Drosophila)                                        | -1.508 | 1.508 | 9.3  |
| A_52_P586104 | NAP061056-1   | NAP061056-1        |                                                                          | -1.508 | 1.508 | 4.96 |
| A_51_P127934 | Fancl         | NM_025923          | Fanconi anemia, complementation group L                                  | -1.508 | 1.508 | 4.44 |
| A_52_P300331 | Wwp1          | NM_177327          | WW domain containing E3 ubiquitin protein ligase 1                       | -1.508 | 1.508 | 5.56 |
| A_51_P270891 | 1700056E22Rik | XM_484951          | RIKEN cDNA 1700056E22 gene                                               | -1.508 | 1.508 | 4.96 |
| A_51_P198488 | Thap7         | NM_026909          | THAP domain containing 7                                                 | -1.508 | 1.508 | 4.44 |
| A_52_P368881 | Prr8          | NM_028234          | proline rich 8                                                           | -1.506 | 1.506 | 9.3  |
| A_51_P379171 | AK007819      | AK007819           |                                                                          | -1.506 | 1.506 | 6.58 |
| A_52_P141384 | Cdcp1         | BC034137           | CUB domain containing protein 1                                          | -1.506 | 1.506 | 6.58 |
| A_52_P124097 | Zfp91         | NM_053009          | zinc finger protein 91                                                   | -1.506 | 1.506 | 7.92 |
| A_52_P660753 | Taf1          | NM_001081008       | TAF1 RNA polymerase II, TATA box binding protein (TBP)-associated factor | -1.506 | 1.506 | 6.58 |
| A_51_P408749 | 4933439C10Rik | NR_015585          | RIKEN cDNA 4933439C10 gene                                               | -1.504 | 1.504 | 4.96 |
| A_51_P167105 | B3galt4       | NM_019420          | UDP-Gal:betaGalNAc beta 1,3-galactosyltransferase, polypeptide 4         | -1.504 | 1.504 | 6.58 |
| A_52_P471088 | Ctage5        | NM_146034          | meningioma expressed antigen 6 (coiled-coil proline-rich)                | -1.504 | 1.504 | 7.92 |
| A_52_P779909 | TC1721552     | TC1721552          |                                                                          | -1.504 | 1.504 | 4.96 |
| A_52_P156932 | Wac           | NM_153085          | WW domain containing adaptor with coiled-coil                            | -1.504 | 1.504 | 9.3  |
| A_52_P708886 | BB755555      | BB755555           |                                                                          | -1.502 | 1.502 | 4.96 |
| A_52_P149766 | Myo1e         | NM_181072          | myosin IE                                                                | -1.502 | 1.502 | 6.58 |
| A_52_P638513 | 2310061J03Rik | NR_027965          | RIKEN cDNA 2310061J03 gene                                               | -1.502 | 1.502 | 5.56 |
| A_51_P153565 | Il18          | NM_008360          | interleukin 18                                                           | -1.502 | 1.502 | 9.3  |
| A_51_P400375 | 0610007P14Rik | NM_021446          | RIKEN cDNA 0610007P14 gene                                               | -1.502 | 1.502 | 7.92 |
| A_52_P674568 | BC024659      | NM_001135577       | cDNA sequence BC024659                                                   | -1.502 | 1.502 | 5.56 |
| A_51_P300281 | Coro1a        | NM_009898          | coronin, actin binding protein 1A                                        | 1.5    | 1.5   | 6.58 |
| A_52_P492644 | D19Bwg1357e   | NM_177474          | DNA segment, Chr 19, Brigham & Women's Genetics 1357 expressed           | 1.5    | 1.5   | 9.3  |
| A_52_P407983 | 4930402H24Rik | AK015050           | RIKEN cDNA 4930402H24 gene                                               | 1.501  | 1.501 | 9.3  |
| A_52_P614731 | Gng12         | NM_025278          | guanine nucleotide binding protein (G protein), gamma 12                 | 1.501  | 1.501 | 6.58 |

|              |                    |                    |                                                                                                       |       |       |      |
|--------------|--------------------|--------------------|-------------------------------------------------------------------------------------------------------|-------|-------|------|
| A_52_P158710 | Dcbl1              | NM_025705          | discoidin, CUB and LCCL domain containing 1                                                           | 1.501 | 1.501 | 9.3  |
| A_52_P18596  | NAP111074-1        | NAP111074-1        | hypothetical protein LOC622592                                                                        | 1.502 | 1.502 | 7.92 |
| A_52_P214573 | Lysmd3             | AK003980           | LysM, putative peptidoglycan-binding, domain containing 3                                             | 1.502 | 1.502 | 9.3  |
| A_52_P327381 | Fndc4              | NM_022424          | fibronectin type III domain containing 4                                                              | 1.502 | 1.502 | 7.92 |
| A_51_P342877 | Scn1b              | NM_011322          | sodium channel, voltage-gated, type I, beta                                                           | 1.502 | 1.502 | 6.58 |
| A_52_P652212 | Psm14              | NM_021526          | proteasome (prosome, macropain) 26S subunit, non-ATPase, 14                                           | 1.503 | 1.503 | 5.56 |
| A_52_P350477 | Mcf2               | NM_139295          | multiple coagulation factor deficiency 2                                                              | 1.504 | 1.504 | 7.92 |
| A_52_P151853 | Tpd52              | NM_001025262       | tumor protein D52                                                                                     | 1.504 | 1.504 | 7.92 |
| A_52_P677117 | Ptpcr              | NM_011210          | protein tyrosine phosphatase, receptor type, C                                                        | 1.505 | 1.505 | 7.92 |
| A_52_P290369 | Usp19              | NM_027804          | ubiquitin specific peptidase 19                                                                       | 1.505 | 1.505 | 6.58 |
| A_52_P582059 | Lyz1               | NM_013590          | lysozyme                                                                                              | 1.507 | 1.507 | 4.96 |
| A_51_P296429 | Tmem170            | NM_025781          | transmembrane protein 170                                                                             | 1.507 | 1.507 | 9.3  |
| A_52_P652704 | Hspa4l             | NM_011020          | heat shock protein 4 like                                                                             | 1.508 | 1.508 | 7.92 |
| A_51_P442583 | Parp4              | NM_001145978       | poly (ADP-ribose) polymerase family, member 4                                                         | 1.508 | 1.508 | 7.92 |
| A_51_P402943 | S100a9             | NM_009114          | S100 calcium binding protein A9 (calgranulin B)                                                       | 1.508 | 1.508 | 9.3  |
| A_51_P169783 | ENSMUST00000109390 | ENSMUST00000109390 | alpha globin regulatory element containing gene                                                       | 1.51  | 1.51  | 7.92 |
| A_51_P481721 | Sult1d1            | NM_016771          | sulfotransferase family 1D, member 1                                                                  | 1.511 | 1.511 | 9.3  |
| A_52_P55902  | Il15ra             | NM_008358          | interleukin 15 receptor, alpha chain                                                                  | 1.511 | 1.511 | 9.3  |
| A_52_P341449 | Pgm3               | NM_028352          | phosphoglucomutase 3                                                                                  | 1.512 | 1.512 | 7.92 |
| A_51_P466673 | Sfrs7              | NM_146083          | splicing factor, arginine/serine-rich 7                                                               | 1.512 | 1.512 | 9.3  |
| A_51_P490323 | Pzp                | NM_007376          |                                                                                                       | 1.513 | 1.513 | 9.3  |
| A_52_P677117 | Ptpcr              | NM_011210          | protein tyrosine phosphatase, receptor type, C                                                        | 1.514 | 1.514 | 5.56 |
| A_52_P181733 | Fam102a            | NM_153560          | RIKEN cDNA C230093N12 gene                                                                            | 1.514 | 1.514 | 5.56 |
| A_51_P332627 | Mybbp1a            | NM_016776          | MYB binding protein (P160) 1a                                                                         | 1.515 | 1.515 | 6.58 |
| A_52_P605387 | Tsg101             | NM_021884          | tumor susceptibility gene 101                                                                         | 1.515 | 1.515 | 5.56 |
| A_51_P502054 | Gtf2b              | NM_145546          | general transcription factor IIB                                                                      | 1.516 | 1.516 | 9.3  |
| A_51_P465043 | Pole4              | NM_025882          | polymerase (DNA-directed), epsilon 4 (p12 subunit)                                                    | 1.516 | 1.516 | 4.96 |
| A_52_P677117 | Ptpcr              | NM_011210          | protein tyrosine phosphatase, receptor type, C                                                        | 1.517 | 1.517 | 9.3  |
| A_51_P207403 | Pwp1               | NM_133993          | PWP1 homolog (S. cerevisiae)                                                                          | 1.517 | 1.517 | 5.56 |
| A_51_P313337 | 2700089E24Rik      | NM_001163445       | RIKEN cDNA 2700089E24 gene                                                                            | 1.519 | 1.519 | 4.44 |
| A_51_P334942 | Aldh1a1            | NM_013467          | aldehyde dehydrogenase family 1, subfamily A1 development and differentiation enhancing factor-like 1 | 1.519 | 1.519 | 6.58 |
| A_51_P502203 | Asap3              | NM_001008232       |                                                                                                       | 1.52  | 1.52  | 7.92 |
| A_51_P120239 | Ptfr               | NM_008986          | polymerase I and transcript release factor                                                            | 1.52  | 1.52  | 7.92 |
| A_52_P612803 | Ccng1              | NM_009831          | cyclin G1                                                                                             | 1.521 | 1.521 | 7.92 |
| A_51_P223475 | Chuk               | NM_007700          | conserved helix-loop-helix ubiquitous kinase                                                          | 1.521 | 1.521 | 7.92 |
| A_51_P317706 | Uba1               | NM_009457          | ubiquitin-activating enzyme E1, Chr X                                                                 | 1.521 | 1.521 | 7.92 |
| A_52_P112182 | Gnas               | S49980             | GNAS (guanine nucleotide binding protein, alpha stimulating) complex locus                            | 1.521 | 1.521 | 7.92 |
| A_51_P224872 | Syne2              | NM_001005510       | synaptic nuclear envelope 2                                                                           | 1.522 | 1.522 | 6.58 |
| A_51_P389539 | Gpr98              | NM_054053          | G protein-coupled receptor 98                                                                         | 1.522 | 1.522 | 7.92 |
| A_51_P483180 | Snx7               | NM_029655          | sorting nexin 7                                                                                       | 1.522 | 1.522 | 6.58 |
| A_52_P528545 | Rabggt1            | NM_019519          | Rab geranylgeranyl transferase, a subunit                                                             | 1.523 | 1.523 | 4.96 |
| A_51_P246705 | Nop14              | NM_029278          | nucleolar protein 14                                                                                  | 1.524 | 1.524 | 7.92 |
| A_51_P306047 | Sec13              | NM_024206          | SEC13 homolog (S. cerevisiae)                                                                         | 1.524 | 1.524 | 5.56 |
| A_52_P677117 | Ptpcr              | NM_011210          | protein tyrosine phosphatase, receptor type, C                                                        | 1.525 | 1.525 | 9.3  |
| A_52_P532029 | Tbk1               | NM_019786          | TANK-binding kinase 1                                                                                 | 1.526 | 1.526 | 6.58 |
| A_52_P85020  | Gadd45gip1         | NM_183358          | growth arrest and DNA-damage-inducible, gamma interacting protein 1                                   | 1.527 | 1.527 | 6.58 |
| A_52_P141161 | Hnrnpf             | NM_133834          | heterogeneous nuclear ribonucleoprotein F                                                             | 1.527 | 1.527 | 7.92 |
| A_51_P241407 | Arap2              | NM_178407          |                                                                                                       | 1.527 | 1.527 | 7.92 |

|               |               |              |                                                                   |       |       |      |
|---------------|---------------|--------------|-------------------------------------------------------------------|-------|-------|------|
| A_52_P677117  | Ptprc         | NM_011210    | protein tyrosine phosphatase, receptor type, C                    | 1.529 | 1.529 | 7.92 |
| A_52_P59908   | 4930420K17Rik | AK080123     | RIKEN cDNA E030031F02 gene                                        | 1.529 | 1.529 | 9.3  |
| A_51_P484027  | AF251705      | NM_134158    | Cd300D antigen                                                    | 1.529 | 1.529 | 7.92 |
| A_51_P436020  | Tmem167       | NM_025335    | transmembrane protein 167                                         | 1.53  | 1.53  | 9.3  |
| A_51_P324768  | Gm14288       | NM_001033123 | similar to gonadotropin inducible ovarian transcription factor 1  | 1.53  | 1.53  | 6.58 |
| A_51_P153982  | Cytsb         | NM_001029936 | sperm antigen with calponin homology and coiled-coil domains 1    | 1.531 | 1.531 | 5.56 |
| A_51_P270286  | Dync1li1      | NM_146229    | dynein cytoplasmic 1 light intermediate chain 1                   | 1.535 | 1.535 | 7.92 |
| A_52_P509744  | Nup160        | NM_021512    | nucleoporin 160                                                   | 1.536 | 1.536 | 7.92 |
| A_51_P371120  | Sec23b        | NM_019787    | SEC23B ( <i>S. cerevisiae</i> )                                   | 1.536 | 1.536 | 9.3  |
| A_52_P234138  | Ube2d3        | NM_025356    | ubiquitin-conjugating enzyme E2D 3 (UBC4/5 homolog, yeast)        | 1.538 | 1.538 | 7.92 |
| A_52_P517001  | Rpf1          | NM_027371    | brix domain containing 5                                          | 1.54  | 1.54  | 4.96 |
| A_51_P481159  | Cbr3          | NM_173047    | carbonyl reductase 3                                              | 1.54  | 1.54  | 9.3  |
| A_52_P304128  | Mmp14         | NM_008608    | matrix metalloproteinase 14 (membrane-inserted)                   | 1.541 | 1.541 | 7.92 |
| A_51_P517928  | Hspa4l        | NM_011020    | heat shock protein 4 like                                         | 1.542 | 1.542 | 9.3  |
| A_52_P488305  | Ndel1         | NM_023668    | nuclear distribution gene E-like homolog 1 ( <i>A. nidulans</i> ) | 1.542 | 1.542 | 6.58 |
| A_52_P1140740 | AK089858      | AK089858     |                                                                   | 1.543 | 1.543 | 7.92 |
| A_52_P662098  | Net1          | NM_019671    | neuroepithelial cell transforming gene 1                          | 1.543 | 1.543 | 9.3  |
| A_52_P260818  | Card10        | NM_130859    | caspase recruitment domain family, member 10                      | 1.543 | 1.543 | 5.56 |
| A_51_P152216  | Tmem41a       | NM_025693    | transmembrane protein 41a                                         | 1.545 | 1.545 | 6.58 |
| A_51_P209308  | Polr1e        | NM_022811    | polymerase (RNA) I polypeptide E                                  | 1.547 | 1.547 | 9.3  |
| A_52_P85152   | Acad11        | NM_175324    | acyl-Coenzyme A dehydrogenase family, member 11                   | 1.547 | 1.547 | 6.58 |
| A_51_P115093  | Nup153        | NM_175749    | nucleoporin 153                                                   | 1.547 | 1.547 | 9.3  |
| A_52_P48976   | Il17rc        | AK033890     | interleukin 17 receptor C                                         | 1.547 | 1.547 | 9.3  |
| A_51_P164030  | Tcp1          | NM_013686    | t-complex protein 1                                               | 1.547 | 1.547 | 4.96 |
| A_52_P326214  | Cttn          | NM_007803    | cortactin                                                         | 1.548 | 1.548 | 5.56 |
| A_52_P231410  | Polr3e        | NM_025298    | polymerase (RNA) III (DNA directed) polypeptide E                 | 1.548 | 1.548 | 9.3  |
| A_52_P667923  | Hspa4l        | NM_011020    | heat shock protein 4 like                                         | 1.548 | 1.548 | 9.3  |
| A_51_P206849  | Gm14288       | NM_001033123 | RIKEN cDNA 2210418O10 gene                                        | 1.549 | 1.549 | 6.58 |
| A_52_P685021  | Cxcl12        | NM_021704    | chemokine (C-X-C motif) ligand 12                                 | 1.55  | 1.55  | 9.3  |
| A_52_P276343  | D19Bwg1357e   | NM_177474    | DNA segment, Chr 19, Brigham & Women's Genetics 1357 expressed    | 1.551 | 1.551 | 7.92 |
| A_51_P313561  | Lmna          | NM_019390    | lamin A                                                           | 1.552 | 1.552 | 9.3  |
| A_52_P250753  | Ghitm         | NM_078478    | growth hormone inducible transmembrane protein                    | 1.554 | 1.554 | 5.56 |
| A_51_P375227  | Bcar1         | NM_009954    | breast cancer anti-estrogen resistance 1                          | 1.557 | 1.557 | 9.3  |
| A_52_P598971  | Chd9          | NM_177224    | chromodomain helicase DNA binding protein 9                       | 1.557 | 1.557 | 9.3  |
| A_52_P32864   | Prps2         | NM_026662    | phosphoribosyl pyrophosphate synthetase 2                         | 1.557 | 1.557 | 5.56 |
| A_51_P155174  | Zfp672        | NR_028331    | zinc finger protein 672                                           | 1.558 | 1.558 | 9.3  |
| A_51_P235878  | Guk1          | NM_008193    | guanylate kinase 1                                                | 1.558 | 1.558 | 6.58 |
| A_52_P305685  | NAP111601-1   | NAP111601-1  |                                                                   | 1.559 | 1.559 | 4.96 |
| A_51_P439746  | Tmem49        | NM_029478    | transmembrane protein 49                                          | 1.56  | 1.56  | 7.92 |
| A_51_P463497  | Rnh1          | NM_145135    | ribonuclease/angiogenesis inhibitor 1                             | 1.56  | 1.56  | 6.58 |
| A_51_P432924  | Ugt2b34       | NM_153598    | UDP glucuronosyltransferase 2 family, polypeptide B34             | 1.56  | 1.56  | 9.3  |
| A_52_P305539  | Kng2          | NM_201375    | kininogen 2                                                       | 1.562 | 1.562 | 7.92 |
| A_52_P616392  | Sbno2         | NM_183426    | strawberry notch homolog 2 ( <i>Drosophila</i> )                  | 1.562 | 1.562 | 6.58 |
| A_52_P608020  | Kpna2         | NM_010655    | karyopherin (importin) alpha 2                                    | 1.562 | 1.562 | 7.92 |
| A_51_P490023  | Tubb2a        | NM_009450    | tubulin, beta 2a                                                  | 1.564 | 1.564 | 7.92 |
| A_51_P340226  | Sh3yl1        | NM_013709    | Sh3 domain YSC-like 1                                             | 1.566 | 1.566 | 5.56 |
| A_51_P297865  | Kctd6         | NM_027782    | potassium channel tetramerisation domain containing 6             | 1.567 | 1.567 | 4.44 |

|              |                |              |                                                                                    |       |       |      |
|--------------|----------------|--------------|------------------------------------------------------------------------------------|-------|-------|------|
| A_52_P561073 | Tox            | NM_145711    | thymocyte selection-associated HMG box gene                                        | 1.567 | 1.567 | 9.3  |
| A_52_P175066 | Cd2ap          | NM_009847    | CD2-associated protein                                                             | 1.567 | 1.567 | 9.3  |
| A_51_P465449 | Mybpc3         | NM_008653    | myosin binding protein C, cardiac                                                  | 1.567 | 1.567 | 3.45 |
| A_52_P205789 | Unc119b        | NM_175352    | expressed sequence AA407659                                                        | 1.569 | 1.569 | 6.58 |
| A_51_P337675 | Cd53           | NM_007651    | CD53 antigen                                                                       | 1.569 | 1.569 | 5.56 |
| A_51_P135137 | St3gal4        | NM_009178    | ST3 beta-galactoside alpha-2,3-sialyltransferase 4                                 | 1.57  | 1.57  | 9.3  |
| A_52_P415440 | Rps12          | AK132208     |                                                                                    | 1.571 | 1.571 | 9.3  |
| A_51_P291819 | Z310033P09Rik  | NM_024210    | RIKEN cDNA Z310033P09 gene                                                         | 1.572 | 1.572 | 4.44 |
| A_52_P650553 | Coq10b         | NM_001039710 | coenzyme Q10 homolog B ( <i>S. cerevisiae</i> )                                    | 1.572 | 1.572 | 9.3  |
| A_52_P249965 | Xdh            | NM_011723    | xanthine dehydrogenase                                                             | 1.573 | 1.573 | 9.3  |
| A_51_P244453 | Kctd3          | NM_172650    | potassium channel tetramerisation domain containing 3                              | 1.573 | 1.573 | 9.3  |
| A_51_P384193 | Eif4g1         | NM_145941    | eukaryotic translation initiation factor 4, gamma 1                                | 1.575 | 1.575 | 9.3  |
| A_52_P452787 | Pdcd6ip        | NM_011052    | programmed cell death 6 interacting protein                                        | 1.575 | 1.575 | 6.58 |
| A_51_P339503 | Cct4           | NM_009837    | chaperonin subunit 4 (delta)                                                       | 1.576 | 1.576 | 5.56 |
| A_52_P440102 | Crnk1          | NM_025820    | Cm, crooked neck-like 1 ( <i>Drosophila</i> )                                      | 1.576 | 1.576 | 6.58 |
| A_51_P124505 | lars           | NM_172015    | isoleucine-tRNA synthetase                                                         | 1.576 | 1.576 | 6.58 |
| A_52_P598278 | Tubb2c         | NM_146116    | tubulin, beta 2c                                                                   | 1.58  | 1.58  | 6.58 |
| A_52_P309381 | Cfh            | NM_009888    | complement component factor h                                                      | 1.581 | 1.581 | 4.2  |
| A_51_P187579 | M17518         | M17518       |                                                                                    | 1.582 | 1.582 | 7.92 |
| A_51_P230624 | Z010109K11Rik  | NM_001162903 | RIKEN cDNA Z010109K11 gene                                                         | 1.583 | 1.583 | 9.3  |
| A_52_P605846 | Cebpb          | NM_009883    | CCAAT/enhancer binding protein (C/EBP), beta                                       | 1.583 | 1.583 | 6.58 |
| A_52_P517006 | Rpf1           | NM_027332    | brix domain containing 5                                                           | 1.583 | 1.583 | 4.44 |
| A_51_P319425 | Utp20          | NM_175158    | UTP20, small subunit (SSU) processome component, homolog (yeast)                   | 1.583 | 1.583 | 4.96 |
| A_52_P192106 | Gm6548         | NR_003363    | predicted gene, EG625054                                                           | 1.584 | 1.584 | 6.58 |
| A_51_P258078 | Nop2           | NM_138747    | nucleolar protein 1                                                                | 1.585 | 1.585 | 9.3  |
| A_51_P413097 | Ints2          | NM_027421    | integrator complex subunit 2                                                       | 1.589 | 1.589 | 6.58 |
| A_51_P317941 | Perp           | NM_022032    | PERP, TP53 apoptosis effector                                                      | 1.591 | 1.591 | 4.96 |
| A_52_P320553 | Z900097C17Rik  | NR_024329    |                                                                                    | 1.592 | 1.592 | 7.92 |
| A_51_P225427 | Pkp2           | NM_026163    | plakophilin 2                                                                      | 1.592 | 1.592 | 9.3  |
| A_52_P10932  | Asb8           | NM_030121    | ankyrin repeat and SOCS box-containing protein 8                                   | 1.594 | 1.594 | 4.96 |
| A_51_P381988 | Hmx1           | NM_010445    | H6 homeo box 1                                                                     | 1.594 | 1.594 | 7.92 |
| A_51_P200561 | Z4930506M07Rik | NM_175172    | RIKEN cDNA Z4930506M07 gene                                                        | 1.594 | 1.594 | 4.96 |
| A_52_P1330   | Nol9           | NM_001159599 | nucleolar protein 9                                                                | 1.596 | 1.596 | 5.56 |
| A_51_P263302 | Rnf24          | NM_178607    | ring finger protein 24                                                             | 1.596 | 1.596 | 5.56 |
| A_51_P195573 | Dnmt1          | NM_010066    | DNA methyltransferase (cytosine-5) 1                                               | 1.598 | 1.598 | 6.58 |
| A_51_P249494 | Sdcbp          | NM_016807    | syndecan binding protein                                                           | 1.598 | 1.598 | 7.92 |
| A_51_P116130 | Ube2g2         | NM_019803    | ubiquitin-conjugating enzyme E2G 2                                                 | 1.598 | 1.598 | 7.92 |
| A_51_P450957 | Acta2          | NM_007392    | actin, alpha 2, smooth muscle, aorta                                               | 1.599 | 1.599 | 6.58 |
| A_52_P329398 | Atp12a         | NM_138652    | ATPase, H <sup>+</sup> /K <sup>+</sup> transporting, nongastric, alpha polypeptide | 1.599 | 1.599 | 9.3  |
| A_52_P685666 | Cct3           | NM_009836    | chaperonin subunit 3 (gamma)                                                       | 1.6   | 1.6   | 9.3  |
| A_51_P363657 | Stk40          | NM_028800    | serine/threonine kinase 40                                                         | 1.6   | 1.6   | 7.92 |
| A_51_P210395 | Glrx           | NM_053108    | glutaredoxin                                                                       | 1.6   | 1.6   | 9.3  |
| A_51_P258493 | Per3           | NM_011067    | period homolog 3 ( <i>Drosophila</i> )                                             | 1.601 | 1.601 | 5.56 |
| A_51_P259995 | Mak16          | NM_026453    | RNA binding motif protein 13                                                       | 1.602 | 1.602 | 7.92 |
| A_52_P242438 | Arf1           | NM_007476    | ADP-ribosylation factor 1                                                          | 1.604 | 1.604 | 6.58 |
| A_52_P732508 | A_52_P732508   | A_52_P732508 |                                                                                    | 1.606 | 1.606 | 4.44 |
| A_52_P404403 | Xrn2           | NM_011917    | 5'-3' exoribonuclease 2                                                            | 1.606 | 1.606 | 5.56 |
| A_51_P512525 | EG214403       | NM_001029977 | complement component factor h                                                      | 1.607 | 1.607 | 3.45 |
| A_51_P110455 | Hsph1          | NM_013559    | heat shock protein 110                                                             | 1.607 | 1.607 | 9.3  |
| A_51_P506792 | Tpd52          | NM_001025261 | tumor protein D52                                                                  | 1.607 | 1.607 | 7.92 |

|              |               |              |                                                                               |       |       |      |
|--------------|---------------|--------------|-------------------------------------------------------------------------------|-------|-------|------|
| A_52_P548940 | Trim11        | NM_053168    | tripartite motif protein 11                                                   | 1.607 | 1.607 | 4.44 |
| A_51_P499918 | Hck           | NM_010407    | hemopoietic cell kinase                                                       | 1.609 | 1.609 | 9.3  |
| A_51_P442016 | Camkk2        | AK050846     | calcium/calmodulin-dependent protein kinase kinase 2, beta                    | 1.609 | 1.609 | 4.96 |
| A_51_P428708 | C4b           | NM_009780    | complement component 4B (Childo blood group)                                  | 1.609 | 1.609 | 5.56 |
| A_52_P394291 | 1190002N15Rik | NM_001033145 | RIKEN cDNA 1190002N15 gene                                                    | 1.611 | 1.611 | 5.56 |
| A_51_P439970 | Ggh           | NM_010281    | gamma-glutamyl hydrolase                                                      | 1.611 | 1.611 | 9.3  |
| A_51_P512519 | EG214403      | M29009       | predicted gene, EG214403                                                      | 1.612 | 1.612 | 6.58 |
| A_51_P103659 | Tubb2a        | NM_009450    | tubulin, beta 2a                                                              | 1.612 | 1.612 | 6.58 |
| A_51_P182794 | Tgm2          | NM_009373    | transglutaminase 2, C polypeptide                                             | 1.612 | 1.612 | 7.92 |
| A_51_P152725 | NAP057020-1   | NAP057020-1  |                                                                               | 1.612 | 1.612 | 4.44 |
| A_51_P306066 | Eif4g2        | NM_013507    | eukaryotic translation initiation factor 4, gamma 2                           | 1.614 | 1.614 | 5.56 |
| A_52_P408025 | Mpped2        | NM_001143683 | metallophosphoesterase domain containing 2                                    | 1.616 | 1.616 | 9.3  |
| A_51_P247955 | Dhx15         | NM_007839    | DEAH (Asp-Glu-Ala-His) box polypeptide 15                                     | 1.617 | 1.617 | 7.92 |
| A_51_P243930 | Qrs1          | NM_001081054 | glutaminyl-tRNA synthase (glutamine-hydrolyzing)-like 1                       | 1.618 | 1.618 | 9.3  |
| A_51_P155234 | Bnip3         | NM_009760    | BCL2/adenovirus E1B interacting protein 1, NIP3                               | 1.619 | 1.619 | 5.56 |
| A_52_P463578 | Mphosph10     | NM_026483    | M-phase phosphoprotein 10 (U3 small nucleolar ribonucleoprotein)              | 1.621 | 1.621 | 7.92 |
| A_51_P345316 | Cep76         | NM_001081073 | centrosomal protein 76                                                        | 1.621 | 1.621 | 3.45 |
| A_51_P354077 | Svil          | NM_153153    | supervillin                                                                   | 1.622 | 1.622 | 9.3  |
| A_51_P428555 | Adh1          | NM_007409    | alcohol dehydrogenase 1 (class I)                                             | 1.622 | 1.622 | 7.92 |
| A_51_P114722 | Hao2          | NM_019545    | hydroxyacid oxidase (glycolate oxidase) 3                                     | 1.624 | 1.624 | 5.56 |
| A_51_P475156 | Rnf19b        | NM_029219    | IBR domain containing 3                                                       | 1.625 | 1.625 | 4.96 |
| A_52_P358860 | Gss           | NM_008180    | glutathione synthetase                                                        | 1.625 | 1.625 | 4.96 |
| A_52_P419678 | Serpina3f     | NM_001033335 | serine (or cysteine) peptidase inhibitor, clade A, member 3F                  | 1.625 | 1.625 | 9.3  |
| A_52_P131548 | Jub           | NM_010590    | ajuba                                                                         | 1.626 | 1.626 | 9.3  |
| A_51_P353360 | Farsb         | NM_011811    | phenylalanyl-tRNA synthetase, beta subunit                                    | 1.626 | 1.626 | 5.56 |
| A_51_P364140 | Ldha          | NM_010699    | lactate dehydrogenase A                                                       | 1.627 | 1.627 | 6.58 |
| A_51_P316379 | Gpr146        | NM_030258    | G protein-coupled receptor 146                                                | 1.627 | 1.627 | 9.3  |
| A_52_P373938 | Gpd2          | NM_001145820 | glycerol phosphate dehydrogenase 2, mitochondrial                             | 1.629 | 1.629 | 9.3  |
| A_52_P232507 | Mup3          | M27608       | major urinary protein 3                                                       | 1.63  | 1.63  | 9.3  |
| A_51_P416613 | 1810058I24Rik | AK082166     | RIKEN cDNA 1810058I24 gene                                                    | 1.63  | 1.63  | 5.56 |
| A_51_P247960 | Dhx15         | AF017153     | DEAH (Asp-Glu-Ala-His) box polypeptide 15                                     | 1.631 | 1.631 | 6.58 |
| A_51_P387239 | ligp1         | NM_021792    | interferon inducible GTPase 1                                                 | 1.632 | 1.632 | 5.56 |
| A_52_P49406  | E430028B21Rik | NM_178668    | RIKEN cDNA E430028B21 gene                                                    | 1.632 | 1.632 | 9.3  |
| A_51_P405882 | Dmtf1         | NM_011806    | cyclin D binding myb-like transcription factor 1                              | 1.632 | 1.632 | 5.56 |
| A_51_P415555 | Amy2a5        | NM_001042711 | amylase 2, pancreatic                                                         | 1.633 | 1.633 | 7.92 |
| A_51_P462102 | Gpr125        | NM_133911    | G protein-coupled receptor 125                                                | 1.635 | 1.635 | 4.2  |
| A_51_P377547 | Tank          | NM_011529    | TRAF family member-associated Nf-kappa B activator                            | 1.637 | 1.637 | 6.58 |
| A_52_P207182 | Arcn1         | NM_145985    | archain 1                                                                     | 1.639 | 1.639 | 4.96 |
| A_52_P303834 | Nek6          | NM_021606    | NIMA (never in mitosis gene a)-related expressed kinase 6                     | 1.64  | 1.64  | 5.56 |
| A_51_P164296 | Adamdec1      | NM_021475    | ADAM-like, decysin 1                                                          | 1.641 | 1.641 | 7.92 |
| A_51_P184936 | Zbp1          | NM_021394    | Z-DNA binding protein 1                                                       | 1.641 | 1.641 | 9.3  |
| A_51_P510782 | Card10        | NM_130859    | caspace recruitment domain family, member 10                                  | 1.641 | 1.641 | 4.44 |
| A_52_P452315 | Syne2         | NM_001005510 | synaptic nuclear envelope 2                                                   | 1.642 | 1.642 | 4.96 |
| A_51_P226417 | Rraga         | NM_178376    | Ras-related GTP binding A                                                     | 1.643 | 1.643 | 9.3  |
| A_51_P453343 | Pnpt1         | NM_027869    | polyribonucleotide nucleotidyltransferase 1                                   | 1.644 | 1.644 | 5.56 |
| A_51_P305843 | Chordc1       | NM_025844    | cysteine and histidine-rich domain (CHORD)-containing, zinc-binding protein 1 | 1.645 | 1.645 | 5.56 |
| A_52_P572476 | Dhrs9         | AK089247     | dehydrogenase/reductase (SDR family) member 9                                 | 1.647 | 1.647 | 4.44 |

|              |          |              |                                                                                              |       |       |      |
|--------------|----------|--------------|----------------------------------------------------------------------------------------------|-------|-------|------|
| A_51_P485043 | Hsp90ab1 | NM_008302    | heat shock protein 90kDa alpha (cytosolic), class B member 1                                 | 1.647 | 1.647 | 4.96 |
| A_51_P365189 | Il13ra1  | NM_133990    | interleukin 13 receptor, alpha 1                                                             | 1.648 | 1.648 | 9.3  |
| A_52_P385896 | Atp8a1   | NM_001038999 | ATPase, aminophospholipid transporter (APLT), class I, type 8A, member 1                     | 1.648 | 1.648 | 6.58 |
| A_51_P223458 | Polr3d   | NM_025945    | polymerase (RNA) III (DNA directed) polypeptide D                                            | 1.649 | 1.649 | 9.3  |
| A_51_P463846 | Gbp6     | NM_145545    | guanylate binding protein 6                                                                  | 1.65  | 1.65  | 7.92 |
| A_51_P209996 | Tuba-rs1 | M19413       | tubulin alpha, related sequence 1                                                            | 1.652 | 1.652 | 6.58 |
| A_52_P607674 | Ppap2c   | NM_015817    | phosphatidic acid phosphatase type 2c                                                        | 1.654 | 1.654 | 9.3  |
| A_52_P460526 | Eif4g2   | NM_013507    | eukaryotic translation initiation factor 4, gamma 2                                          | 1.656 | 1.656 | 4.96 |
| A_51_P422124 | Fam126a  | NM_053090    | down-regulated by Ctnnb1, a                                                                  | 1.658 | 1.658 | 7.92 |
| A_51_P314497 | Btbd10   | NM_133700    | BTB (POZ) domain containing 10                                                               | 1.66  | 1.66  | 9.3  |
| A_52_P299505 | Eef1a1   | NM_010106    | eukaryotic translation elongation factor 1 alpha 1                                           | 1.661 | 1.661 | 5.56 |
| A_51_P237367 | Plekha1  | NM_133942    | pleckstrin homology domain containing, family A (phosphoinositide binding specific) member 1 | 1.662 | 1.662 | 5.56 |
| A_52_P372032 | Ddx21    | NM_019553    | DEAD (Asp-Glu-Ala-Asp) box polypeptide 21                                                    | 1.667 | 1.667 | 5.56 |
| A_51_P182116 | Rcan1    | NM_019466    | Down syndrome critical region homolog 1 (human)                                              | 1.667 | 1.667 | 3.45 |
| A_51_P345393 | Fas      | NM_007987    | Fas (TNF receptor superfamily member)                                                        | 1.669 | 1.669 | 5.56 |
| A_51_P464175 | Aldh3a2  | NM_007437    | aldehyde dehydrogenase family 3, subfamily A2                                                | 1.67  | 1.67  | 9.3  |
| A_52_P385409 | Flnb     | NM_134080    | filamin, beta                                                                                | 1.672 | 1.672 | 4.96 |
| A_52_P470316 | Laptm4b  | NM_033521    | lysosomal-associated protein transmembrane 4B                                                | 1.672 | 1.672 | 4.44 |
| A_51_P345393 | Fas      | NM_007987    | Fas (TNF receptor superfamily member)                                                        | 1.672 | 1.672 | 5.56 |
| A_51_P431470 | Mmd      | NM_026178    | monocyte to macrophage differentiation-associated                                            | 1.673 | 1.673 | 7.92 |
| A_51_P182796 | Tgm2     | NM_009373    | transglutaminase 2, C polypeptide                                                            | 1.673 | 1.673 | 7.92 |
| A_52_P656336 | Crot     | NM_023733    | carnitine O-octanoyltransferase                                                              | 1.675 | 1.675 | 6.58 |
| A_52_P441974 | Evc2     | NM_145920    | Ellis van Creveld syndrome 2 homolog (human)                                                 | 1.675 | 1.675 | 4.96 |
| A_51_P345393 | Fas      | NM_007987    | Fas (TNF receptor superfamily member)                                                        | 1.677 | 1.677 | 5.56 |
| A_51_P291078 | Sel113   | NM_172710    | RIKEN cDNA 2310045A20 gene                                                                   | 1.68  | 1.68  | 9.3  |
| A_51_P281930 | Hsd12    | NM_024255    | hydroxysteroid dehydrogenase like 2                                                          | 1.68  | 1.68  | 9.3  |
| A_52_P134666 | Srpr     | NM_026130    | signal recognition particle receptor ('docking protein')                                     | 1.681 | 1.681 | 4.96 |
| A_52_P557240 | Ugt3a2   | NM_144845    | UDP glycosyltransferases 3 family, polypeptide A2                                            | 1.681 | 1.681 | 4.96 |
| A_51_P153624 | Impg2    | NM_174876    | interphotoreceptor matrix proteoglycan 2                                                     | 1.681 | 1.681 | 4.96 |
| A_51_P345393 | Fas      | NM_007987    | Fas (TNF receptor superfamily member)                                                        | 1.681 | 1.681 | 4.96 |
| A_51_P375969 | Ces3     | NM_053200    | carboxylesterase 3                                                                           | 1.682 | 1.682 | 4.96 |
| A_51_P401184 | Rarres1  | NM_001164763 | retinoic acid receptor responder (tazarotene induced) 1                                      | 1.683 | 1.683 | 7.92 |
| A_51_P259230 | Nup35    | NM_027091    | nucleoporin 35                                                                               | 1.683 | 1.683 | 4.96 |
| A_52_P257812 | Lpl      | NM_008509    | lipoprotein lipase                                                                           | 1.683 | 1.683 | 9.3  |
| A_51_P186531 | Tbrg1    | NM_025289    | transforming growth factor beta regulated gene 1                                             | 1.684 | 1.684 | 4.96 |
| A_51_P145402 | Tuba3a   | NM_009446    | tubulin, alpha 3A                                                                            | 1.687 | 1.687 | 4.96 |
| A_51_P349961 | Gc       | NM_008096    | group specific component                                                                     | 1.688 | 1.688 | 6.58 |
| A_51_P468558 | Trem14   | NM_172623    | triggering receptor expressed on myeloid cells-like 4                                        | 1.688 | 1.688 | 5.56 |
| A_51_P345393 | Fas      | NM_007987    | Fas (TNF receptor superfamily member)                                                        | 1.688 | 1.688 | 5.56 |
| A_51_P345393 | Fas      | NM_007987    | Fas (TNF receptor superfamily member)                                                        | 1.689 | 1.689 | 5.56 |
| A_51_P321341 | Sult1a1  | NM_133670    | sulfotransferase family 1A, phenol-preferring, member 1                                      | 1.689 | 1.689 | 4.44 |
| A_52_P282200 | Dock8    | AK035336     | dedicator of cytokinesis 8                                                                   | 1.691 | 1.691 | 9.3  |
| A_52_P309389 | Cfh      | NM_009888    | complement component factor h                                                                | 1.691 | 1.691 | 3.45 |
| A_52_P183598 | BC026782 | NM_001025575 | complement component factor h                                                                | 1.692 | 1.692 | 4.96 |
| A_51_P280455 | Prg4     | NM_021400    | proteoglycan 4 (megakaryocyte stimulating factor, articular superficial zone protein)        | 1.695 | 1.695 | 4.96 |
| A_52_P338479 | Unc13b   | AK039015     | unc-13 homolog B (C. elegans)                                                                | 1.696 | 1.696 | 4.2  |
| A_51_P345393 | Fas      | NM_007987    | Fas (TNF receptor superfamily member)                                                        | 1.701 | 1.701 | 5.56 |
| A_51_P267063 | Ugt3a2   | NM_144845    | UDP glycosyltransferases 3 family, polypeptide A2                                            | 1.705 | 1.705 | 3.43 |

|              |               |              |                                                                        |       |       |      |
|--------------|---------------|--------------|------------------------------------------------------------------------|-------|-------|------|
| A_51_P180905 | Pcsk6         | NM_011048    | proprotein convertase subtilisin/kexin type 6                          | 1.709 | 1.709 | 7.92 |
| A_52_P460929 | BC048507      | NM_001001185 | cDNA sequence BC048507                                                 | 1.709 | 1.709 | 5.56 |
| A_51_P292933 | Brix1         | NM_026396    | brix domain containing 2                                               | 1.712 | 1.712 | 5.56 |
| A_51_P439876 | Map4k4        | NM_008696    | mitogen-activated protein kinase kinase kinase kinase 4                | 1.713 | 1.713 | 4.96 |
| A_51_P307168 | Ddah1         | NM_026993    |                                                                        | 1.714 | 1.714 | 6.58 |
| A_52_P604025 | Gm5081        | NM_001037746 | expressed sequence AU021838                                            | 1.714 | 1.714 | 7.92 |
| A_51_P345393 | Fas           | NM_007987    | Fas (TNF receptor superfamily member)                                  | 1.715 | 1.715 | 4.96 |
| A_51_P273213 | Grhl1         | NM_145890    | grainyhead-like 1 (Drosophila)                                         | 1.715 | 1.715 | 7.92 |
| A_52_P508985 | Asb8          | NM_030121    | ankyrin repeat and SOCS box-containing protein 8                       | 1.716 | 1.716 | 4.96 |
| A_52_P413289 | Arl1          | NM_025859    | ADP-ribosylation factor-like 1                                         | 1.717 | 1.717 | 7.92 |
| A_51_P322396 | Ugt3a1        | NM_207216    | UDP glycosyltransferases 3 family, polypeptide A1                      | 1.717 | 1.717 | 3.43 |
| A_52_P488640 | Lima1         | NM_023063    | LIM domain and actin binding 1                                         | 1.719 | 1.719 | 3.43 |
| A_51_P384673 | Lrrc59        | NM_133807    | leucine rich repeat containing 59                                      | 1.719 | 1.719 | 4.96 |
| A_51_P265374 | Vnn3          | NM_011979    | vanin 3                                                                | 1.72  | 1.72  | 6.58 |
| A_52_P363452 | 1700019G17Rik | NM_029331    | RIKEN cDNA 1700019G17 gene                                             | 1.722 | 1.722 | 5.56 |
| A_51_P282760 | Per2          | NM_011066    | period homolog 2 (Drosophila)                                          | 1.724 | 1.724 | 7.92 |
| A_51_P286737 | Ccl2          | NM_011333    | chemokine (C-C motif) ligand 2                                         | 1.728 | 1.728 | 7.92 |
| A_51_P377856 | Gst3          | NM_133994    | glutathione S-transferase, theta 3                                     | 1.729 | 1.729 | 9.3  |
| A_51_P412640 | Ccdc51        | NM_025689    | coiled-coil domain containing 51                                       | 1.73  | 1.73  | 6.58 |
| A_51_P345393 | Fas           | NM_007987    | Fas (TNF receptor superfamily member)                                  | 1.731 | 1.731 | 4.96 |
| A_51_P345393 | Fas           | NM_007987    | Fas (TNF receptor superfamily member)                                  | 1.731 | 1.731 | 4.96 |
| A_51_P110471 | Ddah1         | NM_026993    | dimethylarginine dimethylaminohydrolase 1                              | 1.732 | 1.732 | 5.56 |
| A_51_P308844 | Nrn1          | NM_153529    | neuritin 1                                                             | 1.733 | 1.733 | 3.45 |
| A_52_P237899 | 4930402H24Rik | NM_029432    | RIKEN cDNA 4930402H24 gene                                             | 1.735 | 1.735 | 7.92 |
| A_51_P444740 | Smad4         | NM_008540    | MAD homolog 4 (Drosophila)                                             | 1.737 | 1.737 | 4.44 |
| A_51_P160907 | Morc3         | NM_001045529 | microsporidia 3                                                        | 1.738 | 1.738 | 6.58 |
| A_51_P418650 | Vps37c        | NM_181403    | vacuolar protein sorting 37C (yeast)                                   | 1.744 | 1.744 | 6.58 |
| A_51_P170371 | Hspa8         | NM_031165    | heat shock protein 8                                                   | 1.745 | 1.745 | 9.3  |
| A_51_P221031 | Slc16a12      | NM_172838    | solute carrier family 16 (monocarboxylic acid transporters), member 12 | 1.746 | 1.746 | 6.58 |
| A_51_P286737 | Ccl2          | NM_011333    | chemokine (C-C motif) ligand 2                                         | 1.749 | 1.749 | 7.92 |
| A_51_P286737 | Ccl2          | NM_011333    | chemokine (C-C motif) ligand 2                                         | 1.753 | 1.753 | 7.92 |
| A_52_P704340 | NAP061200-1   | NAP061200-1  |                                                                        | 1.758 | 1.758 | 5.56 |
| A_51_P433360 | Cyp4a12b      | NM_172306    | cytochrome P450, family 4, subfamily a, polypeptide 12                 | 1.759 | 1.759 | 7.92 |
| A_52_P353417 | Gm2a          | NM_010299    | GM2 ganglioside activator protein                                      | 1.761 | 1.761 | 5.56 |
| A_51_P260051 | Arf1          | NM_007476    | ADP-ribosylation factor 1                                              | 1.762 | 1.762 | 5.56 |
| A_51_P301994 | Rg9mtd1       | NM_029092    | RNA (guanine-9-) methyltransferase domain containing 1                 | 1.762 | 1.762 | 4.96 |
| A_52_P117334 | Thumpd3       | NM_008188    | THUMP domain containing 3                                              | 1.763 | 1.763 | 7.92 |
| A_52_P629895 | Adh1          | NM_007409    | alcohol dehydrogenase 1 (class I)                                      | 1.763 | 1.763 | 3.45 |
| A_52_P541826 | Eif4a1        | NM_144958    | eukaryotic translation initiation factor 4A1                           | 1.767 | 1.767 | 3.45 |
| A_51_P156857 | 2010002N04Rik | NM_134133    | RIKEN cDNA 2010002N04 gene                                             | 1.768 | 1.768 | 7.92 |
| A_51_P286737 | Ccl2          | NM_011333    | chemokine (C-C motif) ligand 2                                         | 1.77  | 1.77  | 5.56 |
| A_51_P286737 | Ccl2          | NM_011333    | chemokine (C-C motif) ligand 2                                         | 1.771 | 1.771 | 5.56 |
| A_52_P579441 | Morc3         | NM_001045529 | microsporidia 3                                                        | 1.773 | 1.773 | 6.58 |
| A_51_P286737 | Ccl2          | NM_011333    | chemokine (C-C motif) ligand 2                                         | 1.773 | 1.773 | 6.58 |
| A_51_P258150 | Plin2         | NM_007408    | adipose differentiation related protein                                | 1.778 | 1.778 | 4.96 |
| A_51_P379208 | Ccdc21        | NM_144527    | coiled-coil domain containing 21                                       | 1.779 | 1.779 | 7.92 |
| A_52_P663526 | BC016495      | NM_145497    | cDNA sequence BC016495                                                 | 1.781 | 1.781 | 4.2  |
| A_51_P286737 | Ccl2          | NM_011333    | chemokine (C-C motif) ligand 2                                         | 1.781 | 1.781 | 6.58 |
| A_51_P347440 | E430028B21Rik | NM_178668    | RIKEN cDNA E430028B21 gene                                             | 1.783 | 1.783 | 7.92 |



|              |               |                    |                                                                                 |       |       |      |
|--------------|---------------|--------------------|---------------------------------------------------------------------------------|-------|-------|------|
| A_51_P421912 | Tox           | NM_145711          | thymocyte selection-associated HMG box gene                                     | 1.783 | 1.783 | 5.56 |
| A_52_P492062 | NAP017816-001 | NAP017816-001      | similar to L-lactate dehydrogenase A chain (LDH-A) (LDH muscle subunit) (LDH-M) | 1.783 | 1.783 | 4.96 |
| A_51_P286737 | Ccl2          | NM_011333          | chemokine (C-C motif) ligand 2                                                  | 1.784 | 1.784 | 6.58 |
| A_51_P479590 | Wwc1          | ENSMUST00000018993 | WW, C2 and coiled-coil domain containing 1                                      | 1.784 | 1.784 | 4.96 |
| A_51_P312437 | Dhrs7         | NM_025522          | dehydrogenase/reductase (SDR family) member 7                                   | 1.785 | 1.785 | 4.96 |
| A_51_P136542 | Bcl3          | NM_033601          | B-cell leukemia/lymphoma 3                                                      | 1.787 | 1.787 | 6.58 |
| A_52_P685979 | 1700055N04Rik | AK006803           | RIKEN cDNA 1700055N04 gene                                                      | 1.788 | 1.788 | 5.56 |
| A_51_P286737 | Ccl2          | NM_011333          | chemokine (C-C motif) ligand 2                                                  | 1.79  | 1.79  | 6.58 |
| A_52_P595140 | Hsd17b13      | NM_198030          | hydroxysteroid (17-beta) dehydrogenase 13                                       | 1.793 | 1.793 | 4.96 |
| A_52_P592230 | Dnaja4        | NM_021422          | DnaJ (Hsp40) homolog, subfamily A, member 4                                     | 1.795 | 1.795 | 3.45 |
| A_52_P658122 | Ets2          | NM_011809          | E26 avian leukemia oncogene 2, 3' domain                                        | 1.797 | 1.797 | 5.56 |
| A_52_P600750 | NAP056541-1   | NAP056541-1        |                                                                                 | 1.797 | 1.797 | 4.96 |
| A_51_P346938 | Lrg1          | NM_029796          | leucine-rich alpha-2-glycoprotein 1                                             | 1.801 | 1.801 | 9.3  |
| A_52_P16419  | Gpd1          | NM_010271          | glycerol-3-phosphate dehydrogenase 1 (soluble)                                  | 1.803 | 1.803 | 3.45 |
| A_51_P224843 | Tmsb4x        | NM_021278          | thymosin, beta 4, X chromosome                                                  | 1.805 | 1.805 | 6.58 |
| A_52_P180972 | NAP029125-1   | NAP029125-1        |                                                                                 | 1.806 | 1.806 | 4.44 |
| A_52_P923110 | 6330509M05Rik | AK031957           | RIKEN cDNA 6330509M05 gene                                                      | 1.809 | 1.809 | 4.2  |
| A_51_P262171 | Irgm1         | NM_008326          | immunity-related GTPase family, M                                               | 1.814 | 1.814 | 9.3  |
| A_51_P440682 | Cap1          | NM_007598          | CAP, adenylate cyclase-associated protein 1 (yeast)                             | 1.822 | 1.822 | 3.45 |
| A_51_P286737 | Ccl2          | NM_011333          | chemokine (C-C motif) ligand 2                                                  | 1.825 | 1.825 | 4.96 |
| A_51_P489153 | Crot          | NM_023733          | carnitine O-octanoyltransferase                                                 | 1.827 | 1.827 | 6.58 |
| A_51_P243755 | Slc10a2       | NM_011388          | solute carrier family 10, member 2                                              | 1.828 | 1.828 | 7.92 |
| A_52_P375076 | Hyou1         | BC019785           | hypoxia up-regulated 1                                                          | 1.831 | 1.831 | 6.58 |
| A_52_P294510 | Fgl1          | BC029734           | fibrinogen-like protein 1                                                       | 1.832 | 1.832 | 6.58 |
| A_52_P639424 | Gga3          | NM_173048          | golgi associated, gamma adaptin ear containing, ARF binding protein 3           | 1.835 | 1.835 | 5.56 |
| A_52_P527822 | Slc22a3       | NM_011395          | solute carrier family 22 (organic cation transporter), member 3                 | 1.836 | 1.836 | 4.96 |
| A_52_P972003 | C730036E19Rik | AK050309           | RIKEN cDNA C730036E19 gene                                                      | 1.837 | 1.837 | 4.96 |
| A_51_P129803 | Cacybp        | NM_009786          | calcyclin binding protein                                                       | 1.841 | 1.841 | 4.96 |
| A_51_P232142 | Thumpd3       | NM_008188          | THUMP domain containing 3                                                       | 1.841 | 1.841 | 7.92 |
| A_51_P371912 | Kctd12        | NM_177715          | potassium channel tetramerisation domain containing 12                          | 1.848 | 1.848 | 5.56 |
| A_52_P310225 | Dnaja1        | NM_008298          | DnaJ (Hsp40) homolog, subfamily A, member 1                                     | 1.851 | 1.851 | 7.92 |
| A_51_P208121 | Klhl25        | NM_182782          | kelch-like 25 (Drosophila)                                                      | 1.854 | 1.854 | 7.92 |
| A_52_P89683  | Gm14470       | XM_001474667       | similar to L-lactate dehydrogenase A chain (LDH-A) (LDH muscle subunit) (LDH-M) | 1.86  | 1.86  | 4.96 |
| A_52_P473172 | NAP012030-001 | NAP012030-001      |                                                                                 | 1.86  | 1.86  | 5.56 |
| A_52_P64707  | Foxa3         | NM_008260          | forkhead box A3                                                                 | 1.866 | 1.866 | 9.3  |
| A_52_P34031  | 1700019G17Rik | NM_029331          | RIKEN cDNA 1700019G17 gene                                                      | 1.866 | 1.866 | 6.58 |
| A_52_P263673 | 4833442J19Rik | NM_177101          | RIKEN cDNA 4833442J19 gene                                                      | 1.875 | 1.875 | 4.44 |
| A_51_P221510 | Fam81a        | NM_029784          | RIKEN cDNA 6430514L14 gene                                                      | 1.876 | 1.876 | 7.92 |
| A_52_P682045 | Cml3          | NM_053097          | camello-like 3                                                                  | 1.876 | 1.876 | 4.96 |
| A_51_P101729 | Cfh           | M12660             | complement component factor h                                                   | 1.883 | 1.883 | 3.45 |
| A_51_P219505 | Slc41a2       | NM_177388          | solute carrier family 41, member 2                                              | 1.883 | 1.883 | 4.96 |
| A_51_P239750 | Inhba         | NM_008380          | inhibin beta-A                                                                  | 1.884 | 1.884 | 7.92 |
| A_51_P466180 | Gm2a          | NM_010299          | GM2 ganglioside activator protein                                               | 1.888 | 1.888 | 4.96 |
| A_52_P372925 | Nck2          | NM_010879          | non-catalytic region of tyrosine kinase adaptor protein 2                       | 1.891 | 1.891 | 3.45 |
| A_51_P502443 | Gga3          | NM_173048          | golgi associated, gamma adaptin ear containing, ARF binding protein 3           | 1.892 | 1.892 | 6.58 |
| A_52_P613241 | Icam1         | NM_010493          | intercellular adhesion molecule                                                 | 1.894 | 1.894 | 3.45 |

|              |               |                    |                                                                             |       |       |      |
|--------------|---------------|--------------------|-----------------------------------------------------------------------------|-------|-------|------|
| A_52_P469502 | Cda           | NM_028176          | cytidine deaminase                                                          | 1.899 | 1.899 | 9.3  |
| A_51_P305003 | Ntrk1         | NM_001033124       | neurotrophic tyrosine kinase, receptor, type 1                              | 1.9   | 1.9   | 9.3  |
| A_52_P46085  | Mvp           | NM_080638          | major vault protein                                                         | 1.904 | 1.904 | 6.58 |
| A_52_P330395 | Farp1         | NM_134082          | FERM, RhoGEF (Arhgef) and pleckstrin domain protein 1 (chondrocyte-derived) | 1.907 | 1.907 | 6.58 |
| A_52_P459288 | AK050350      | AK050350           | RIKEN cDNA 4930402H24 gene                                                  | 1.912 | 1.912 | 6.58 |
| A_51_P303346 | Dnaja1        | NM_008298          | DnaJ (Hsp40) homolog, subfamily A, member 1                                 | 1.912 | 1.912 | 6.58 |
| A_52_P422514 | NAP037463-1   | NAP037463-1        |                                                                             | 1.913 | 1.913 | 5.56 |
| A_51_P258113 | Laptm4b       | NM_033521          | lysosomal-associated protein transmembrane 4B                               | 1.916 | 1.916 | 4.44 |
| A_52_P240712 | Cml2          | NM_053096          | camello-like 2                                                              | 1.92  | 1.92  | 4.96 |
| A_51_P430973 | Paqr7         | NM_027995          | progesterin and adipoQ receptor family member VII                           | 1.92  | 1.92  | 7.92 |
| A_51_P332939 | Farp1         | NM_134082          | FERM, RhoGEF (Arhgef) and pleckstrin domain protein 1 (chondrocyte-derived) | 1.922 | 1.922 | 5.56 |
| A_51_P266883 | Mup4          | NM_008648          | major urinary protein 4                                                     | 1.926 | 1.926 | 9.3  |
| A_52_P220229 | Plekhb2       | NM_145516          | pleckstrin homology domain containing, family B (evectins) member 2         | 1.928 | 1.928 | 3.45 |
| A_52_P319552 | 1700024P16Rik | NM_001162980       | RIKEN cDNA 1700024P16 gene                                                  | 1.93  | 1.93  | 6.58 |
| A_51_P144438 | Znfx1         | NM_001033196       | expressed sequence AI481105                                                 | 1.935 | 1.935 | 4.44 |
| A_52_P552194 | Il13ra1       | NM_133990          | interleukin 13 receptor, alpha 1                                            | 1.936 | 1.936 | 4.44 |
| A_51_P364146 | Ldha          | NM_010699          | lactate dehydrogenase A                                                     | 1.937 | 1.937 | 4.44 |
| A_52_P503809 | Tuba1c        | NM_009448          | tubulin, alpha 1B                                                           | 1.939 | 1.939 | 4.96 |
| A_51_P408506 | Icam1         | ENSMUST00000086399 | intercellular adhesion molecule                                             | 1.94  | 1.94  | 4.96 |
| A_51_P114714 | Trim13        | NM_023233          | tripartite motif protein 13                                                 | 1.946 | 1.946 | 6.58 |
| A_51_P306731 | Agpat9        | NM_172715          | RIKEN cDNA A230097K15 gene                                                  | 1.949 | 1.949 | 9.3  |
| A_51_P414518 | Dynll1        | NM_019682          | dynein light chain LC8-type 1                                               | 1.95  | 1.95  | 4.2  |
| A_51_P408506 | Icam1         | ENSMUST00000086399 | intercellular adhesion molecule                                             | 1.954 | 1.954 | 4.96 |
| A_51_P261737 | Pdzk1         | NM_021517          | PDZ domain containing 1                                                     | 1.956 | 1.956 | 4.44 |
| A_52_P432919 | Rab3d         | NM_031874          | RAB3D, member RAS oncogene family                                           | 1.963 | 1.963 | 7.92 |
| A_51_P234330 | Rtkn          | NM_133641          | rhotekin                                                                    | 1.964 | 1.964 | 4.2  |
| A_51_P157537 | Mapkapk3      | NM_178907          | mitogen-activated protein kinase-activated protein kinase 3                 | 1.972 | 1.972 | 3.45 |
| A_51_P408506 | Icam1         | ENSMUST00000086399 | intercellular adhesion molecule                                             | 1.976 | 1.976 | 4.96 |
| A_51_P408506 | Icam1         | ENSMUST00000086399 | intercellular adhesion molecule                                             | 1.982 | 1.982 | 4.44 |
| A_51_P103237 | Hunk          | NM_015755          | hormonally upregulated Neu-associated kinase                                | 1.984 | 1.984 | 4.44 |
| A_51_P456941 | Ier5          | NM_010500          | immediate early response 5                                                  | 1.986 | 1.986 | 7.92 |
| A_51_P402267 | Slc17a3       | NM_134069          | solute carrier family 17 (sodium phosphate), member 3                       | 1.987 | 1.987 | 4.2  |
| A_51_P408506 | Icam1         | ENSMUST00000086399 | intercellular adhesion molecule                                             | 1.991 | 1.991 | 4.44 |
| A_52_P186754 | Srpr          | NM_026130          | signal recognition particle receptor ('docking protein')                    | 1.993 | 1.993 | 4.2  |
| A_51_P228658 | Isyna1        | NM_023627          | myo-inositol 1-phosphate synthase A1                                        | 1.998 | 1.998 | 3.43 |
| A_51_P387528 | Ak7           | NM_030187          | adenylate kinase 7                                                          | 1.999 | 1.999 | 3.45 |
| A_51_P139678 | Sprr1a        | NM_009264          | small proline-rich protein 1A                                               | 2.002 | 2.002 | 7.92 |
| A_51_P424954 | B230114P17Rik | AK045415           | RIKEN cDNA B230114P17 gene                                                  | 2.005 | 2.005 | 3.45 |
| A_51_P469285 | Nrp1          | NM_008737          | neuropilin 1                                                                | 2.008 | 2.008 | 5.56 |
| A_51_P498882 | Cyp2c37       | NM_010001          | cytochrome P450, family 2, subfamily c, polypeptide 37                      | 2.008 | 2.008 | 3.43 |
| A_51_P408506 | Icam1         | ENSMUST00000086399 | intercellular adhesion molecule                                             | 2.009 | 2.009 | 4.96 |
| A_51_P408506 | Icam1         | ENSMUST00000086399 | intercellular adhesion molecule                                             | 2.009 | 2.009 | 4.44 |
| A_51_P408506 | Icam1         | ENSMUST00000086399 | intercellular adhesion molecule                                             | 2.01  | 2.01  | 4.44 |

|              |                    |                    |                                                                       |       |       |      |
|--------------|--------------------|--------------------|-----------------------------------------------------------------------|-------|-------|------|
| A_52_P452689 | Atf3               | NM_007498          | activating transcription factor 3                                     | 2.01  | 2.01  | 4.96 |
| A_51_P408506 | Icam1              | ENSMUST00000086399 | intercellular adhesion molecule                                       | 2.011 | 2.011 | 4.44 |
| A_52_P361081 | Arhgef16           | NM_001112744       | Rho guanine nucleotide exchange factor (GEF) 16                       | 2.012 | 2.012 | 7.92 |
| A_52_P106429 | Dnaja1             | NM_008298          | DnaJ (Hsp40) homolog, subfamily A, member 1                           | 2.012 | 2.012 | 4.96 |
| A_52_P257204 | Hsp90ab1           | NM_008302          | heat shock protein 90kDa alpha (cytosolic), class B member 1          | 2.023 | 2.023 | 3.45 |
| A_52_P600087 | NAP107975-1        | NAP107975-1        |                                                                       | 2.027 | 2.027 | 4.2  |
| A_52_P126158 | Irgm1              | NM_008326          | immunity-related GTPase family, M                                     | 2.028 | 2.028 | 9.3  |
| A_51_P182813 | A_51_P182813       | A_51_P182813       |                                                                       | 2.034 | 2.034 | 5.56 |
| A_51_P408506 | Icam1              | ENSMUST00000086399 | intercellular adhesion molecule                                       | 2.041 | 2.041 | 4.44 |
| A_51_P401343 | Cldn14             | NM_019500          | claudin 14                                                            | 2.041 | 2.041 | 7.92 |
| A_52_P82991  | NAP061094-1        | NAP061094-1        |                                                                       | 2.061 | 2.061 | 4.2  |
| A_51_P182362 | ENSMUST00000005477 | ENSMUST00000005477 | cytochrome P450, family 2, subfamily b, polypeptide 10                | 2.062 | 2.062 | 4.96 |
| A_51_P247799 | Casp8              | NM_009812          | caspase 8                                                             | 2.074 | 2.074 | 3.45 |
| A_51_P290231 | Hsp90aa1           | NM_010480          | heat shock protein 90kDa alpha (cytosolic), class A member 1          | 2.083 | 2.083 | 4.96 |
| A_52_P572808 | Agpat9             | NM_172715          | RIKEN cDNA A230097K15 gene                                            | 2.094 | 2.094 | 6.58 |
| A_52_P190973 | Vcl                | NM_009502          | vinculin                                                              | 2.108 | 2.108 | 4.96 |
| A_52_P609778 | Mgll               | NM_011844          | monoglyceride lipase                                                  | 2.109 | 2.109 | 4.44 |
| A_52_P167278 | Mthfd1l            | NM_172308          | methylenetetrahydrofolate dehydrogenase (NADP+ dependent) 1-like      | 2.12  | 2.12  | 3.45 |
| A_51_P301394 | Gspt2              | NM_008179          | G1 to S phase transition 2                                            | 2.125 | 2.125 | 4.96 |
| A_52_P159276 | Grhl1              | NM_145890          | grainyhead-like 1 (Drosophila)                                        | 2.14  | 2.14  | 4.96 |
| A_51_P290526 | Abcd2              | NM_011994          | ATP-binding cassette, sub-family D (ALD), member 2                    | 2.143 | 2.143 | 4.2  |
| A_51_P432180 | Slc16a6            | NM_001029842       | solute carrier family 16 (monocarboxylic acid transporters), member 6 | 2.159 | 2.159 | 2.56 |
| A_52_P472486 | Cyp2b10            | NM_009999          | cytochrome P450, family 2, subfamily b, polypeptide 10                | 2.183 | 2.183 | 4.96 |
| A_51_P450573 | Tgfb2              | NM_009371          | transforming growth factor, beta receptor II                          | 2.183 | 2.183 | 5.56 |
| A_52_P518160 | Galns              | NM_016722          | galactosamine (N-acetyl)-6-sulfate sulfatase                          | 2.209 | 2.209 | 3.43 |
| A_52_P166846 | Gigyf2             | AK034426           | trinucleotide repeat containing 15                                    | 2.211 | 2.211 | 4.44 |
| A_51_P399305 | Tnfrsf19           | NM_013869          | tumor necrosis factor receptor superfamily, member 19                 | 2.219 | 2.219 | 6.58 |
| A_52_P72237  | Actg1              | NM_009609          | actin, gamma, cytoplasmic 1                                           | 2.228 | 2.228 | 7.92 |
| A_52_P423814 | Cox8b              | NM_007751          | cytochrome c oxidase, subunit VIIIb                                   | 2.231 | 2.231 | 3.45 |
| A_51_P139920 | Mgll               | NM_011844          | monoglyceride lipase                                                  | 2.237 | 2.237 | 3.45 |
| A_51_P281734 | Plxnb1             | NM_172775          | plexin B1                                                             | 2.238 | 2.238 | 3.45 |
| A_52_P193533 | Slc25a30           | ENSMUST00000022580 | solute carrier family 25, member 30                                   | 2.25  | 2.25  | 9.3  |
| A_51_P403477 | Dio1               | NM_007860          | deiodinase, iodothyronine, type I                                     | 2.258 | 2.258 | 6.58 |
| A_51_P372550 | Cgref1             | NM_026770          | cell growth regulator with EF hand domain 1                           | 2.265 | 2.265 | 4.96 |
| A_51_P281078 | A_51_P281078       | A_51_P281078       |                                                                       | 2.274 | 2.274 | 6.58 |
| A_52_P61102  | Slc10a2            | NM_011388          | solute carrier family 10, member 2                                    | 2.282 | 2.282 | 4.96 |
| A_51_P467076 | Cyp2b9             | NM_010000          | cytochrome P450, family 2, subfamily b, polypeptide 9                 | 2.289 | 2.289 | 3.45 |
| A_52_P681787 | Cyb561             | NM_007805          | cytochrome b-561                                                      | 2.29  | 2.29  | 6.58 |
| A_52_P254237 | Tmem229a           | NM_177013          | RIKEN cDNA 6332401O19 gene                                            | 2.301 | 2.301 | 2.56 |
| A_51_P420489 | Acot3              | NM_134246          | acyl-CoA thioesterase 3                                               | 2.306 | 2.306 | 7.92 |
| A_51_P143893 | Steap4             | NM_054098          | STEAP family member 4                                                 | 2.313 | 2.313 | 9.3  |
| A_52_P348256 | ENSMUST00000084544 | ENSMUST00000084544 | major urinary protein 1                                               | 2.313 | 2.313 | 5.56 |
| A_52_P481320 | NAP027922-1        | NAP027922-1        |                                                                       | 2.314 | 2.314 | 5.56 |
| A_51_P356705 | Plekhb2            | NM_145516          | pleckstrin homology domain containing, family B (evectins) member 2   | 2.315 | 2.315 | 3.43 |

|               |               |              |                                                                           |       |       |      |
|---------------|---------------|--------------|---------------------------------------------------------------------------|-------|-------|------|
| A_51_P481238  | Dopey2        | NM_027293    | dopey family member 2                                                     | 2.344 | 2.344 | 4.96 |
| A_51_P214423  | Tead1         | NM_001166584 | RIKEN cDNA 2610024B07 gene                                                | 2.351 | 2.351 | 5.56 |
| A_52_P182919  | Steap4        | NM_054098    | STEAP family member 4                                                     | 2.377 | 2.377 | 9.3  |
| A_52_P93910   | Nrp2          | NM_001077403 | neuropilin 2                                                              | 2.417 | 2.417 | 3.43 |
| A_52_P364021  | Mogat1        | NM_026713    | monoacylglycerol O-acyltransferase 1                                      | 2.421 | 2.421 | 2.56 |
| A_51_P428977  | Onecut1       | AK051235     | one cut domain, family member 1                                           | 2.449 | 2.449 | 4.96 |
| A_52_P407145  | Txnl4a        | NM_025299    | thioredoxin-like 4                                                        | 2.455 | 2.455 | 2.56 |
| A_51_P112151  | Mogat1        | NM_026713    | monoacylglycerol O-acyltransferase 1                                      | 2.468 | 2.468 | 2.56 |
| A_51_P461703  | Mup1          | NM_031188    | major urinary protein 1                                                   | 2.474 | 2.474 | 7.92 |
| A_52_P139316  | Mup8          | NM_001134676 |                                                                           | 2.475 | 2.475 | 6.58 |
| A_51_P325914  | Jun           | NM_010591    | Jun oncogene                                                              | 2.513 | 2.513 | 3.45 |
| A_52_P364130  | Map3k14       | NM_016896    | mitogen-activated protein kinase kinase kinase 14                         | 2.522 | 2.522 | 4.44 |
| A_51_P126198  | Dapk2         | NM_010019    | death-associated kinase 2                                                 | 2.55  | 2.55  | 3.45 |
| A_52_P431615  | Gm1966        | XM_001000891 | gene model 1966, (NCBI)                                                   | 2.56  | 2.56  | 9.3  |
| A_52_P12877   | Hspa8         | NM_031165    | heat shock protein 8                                                      | 2.581 | 2.581 | 4.96 |
| A_52_P308465  | Plxn1         | NM_172775    | plexin B1                                                                 | 2.587 | 2.587 | 3.43 |
| A_51_P185882  | Ccdc68        | NM_201362    | coiled-coil domain containing 68                                          | 2.644 | 2.644 | 2.56 |
| A_51_P325914  | Jun           | NM_010591    | Jun oncogene                                                              | 2.648 | 2.648 | 3.45 |
| A_52_P64376   | Mogat1        | NM_026713    | monoacylglycerol O-acyltransferase 1                                      | 2.653 | 2.653 | 1.97 |
| A_51_P514319  | Slc13a4       | NM_172892    | solute carrier family 13 (sodium/sulfate symporters), member 4            | 2.654 | 2.654 | 3.45 |
| A_51_P325914  | Jun           | NM_010591    | Jun oncogene                                                              | 2.665 | 2.665 | 3.45 |
| A_51_P342206  | Cyp2c38       | NM_010002    | cytochrome P450, family 2, subfamily c, polypeptide 38                    | 2.668 | 2.668 | 1.97 |
| A_51_P325914  | Jun           | NM_010591    | Jun oncogene                                                              | 2.669 | 2.669 | 3.45 |
| A_52_P677262  | Serpina4-ps1  | NR_002861    | serine (or cysteine) peptidase inhibitor, clade A, member 4, pseudogene 1 | 2.672 | 2.672 | 7.92 |
| A_51_P306017  | Dll1          | NM_007865    | delta-like 1 (Drosophila)                                                 | 2.673 | 2.673 | 3.45 |
| A_52_P371237  | Nrp1          | NM_008737    | neuropilin 1                                                              | 2.675 | 2.675 | 4.2  |
| A_51_P306017  | Dll1          | NM_007865    | delta-like 1 (Drosophila)                                                 | 2.678 | 2.678 | 3.45 |
| A_51_P325914  | Jun           | NM_010591    | Jun oncogene                                                              | 2.691 | 2.691 | 3.45 |
| A_51_P325914  | Jun           | NM_010591    | Jun oncogene                                                              | 2.693 | 2.693 | 3.45 |
| A_51_P306017  | Dll1          | NM_007865    | delta-like 1 (Drosophila)                                                 | 2.704 | 2.704 | 3.45 |
| A_51_P325914  | Jun           | NM_010591    | Jun oncogene                                                              | 2.713 | 2.713 | 3.43 |
| A_51_P325914  | Jun           | NM_010591    | Jun oncogene                                                              | 2.717 | 2.717 | 3.45 |
| A_51_P306017  | Dll1          | NM_007865    | delta-like 1 (Drosophila)                                                 | 2.729 | 2.729 | 3.45 |
| A_51_P325914  | Jun           | NM_010591    | Jun oncogene                                                              | 2.737 | 2.737 | 3.45 |
| A_51_P306017  | Dll1          | NM_007865    | delta-like 1 (Drosophila)                                                 | 2.741 | 2.741 | 3.45 |
| A_51_P465211  | Wfdc2         | NM_026323    | WAP four-disulfide core domain 2                                          | 2.742 | 2.742 | 7.92 |
| A_51_P306017  | Dll1          | NM_007865    | delta-like 1 (Drosophila)                                                 | 2.742 | 2.742 | 3.45 |
| A_51_P306017  | Dll1          | NM_007865    | delta-like 1 (Drosophila)                                                 | 2.748 | 2.748 | 3.45 |
| A_51_P325914  | Jun           | NM_010591    | Jun oncogene                                                              | 2.755 | 2.755 | 3.45 |
| A_52_P256914  | Cyp2b9        | NM_010000    | cytochrome P450, family 2, subfamily b, polypeptide 9                     | 2.757 | 2.757 | 2.56 |
| A_52_P617327  | Rcan1         | NM_019466    | Down syndrome critical region homolog 1 (human)                           | 2.775 | 2.775 | 3.45 |
| A_52_P1147595 | 9130221J18Rik | AK033690     | RIKEN cDNA 9130221J18 gene                                                | 2.791 | 2.791 | 4.2  |
| A_51_P249302  | Abcd2         | NM_011994    | ATP-binding cassette, sub-family D (ALD), member 2                        | 2.793 | 2.793 | 2.56 |
| A_51_P306017  | Dll1          | NM_007865    | delta-like 1 (Drosophila)                                                 | 2.799 | 2.799 | 3.45 |
| A_51_P339098  | Serpina4-ps1  | NR_002861    | serine (or cysteine) peptidase inhibitor, clade A, member 4, pseudogene 1 | 2.818 | 2.818 | 9.3  |
| A_52_P170685  | NAP102507-1   | NAP102507-1  |                                                                           | 2.822 | 2.822 | 4.96 |
| A_51_P492339  | Cyp2b13       | NM_007813    | cytochrome P450, family 2, subfamily b, polypeptide 13                    | 2.823 | 2.823 | 2.56 |
| A_51_P306017  | Dll1          | NM_007865    | delta-like 1 (Drosophila)                                                 | 2.852 | 2.852 | 3.43 |

|              |                    |                    |                                                             |        |        |      |
|--------------|--------------------|--------------------|-------------------------------------------------------------|--------|--------|------|
| A_51_P281568 | C730007P19Rik      | NM_009286          | RIKEN cDNA C730007P19 gene                                  | 2.879  | 2.879  | 9.3  |
| A_52_P431159 | Il1rn              | NM_001039701       | interleukin 1 receptor antagonist                           | 2.883  | 2.883  | 4.96 |
| A_52_P323111 | Lass6              | AK136463           | longevity assurance homolog 6 (S. cerevisiae)               | 2.884  | 2.884  | 4.96 |
| A_52_P468564 | Cyp2c38            | NM_010002          | cytochrome P450, family 2, subfamily c, polypeptide 38      | 2.89   | 2.89   | 2.56 |
| A_52_P624155 | NAP103999-1        | NAP103999-1        |                                                             | 2.892  | 2.892  | 6.58 |
| A_51_P306017 | Dll1               | NM_007865          | delta-like 1 (Drosophila)                                   | 2.908  | 2.908  | 3.43 |
| A_51_P180314 | Mup10              | AK011413           | major urinary protein 1                                     | 2.948  | 2.948  | 5.56 |
| A_52_P404533 | Hspb1              | NM_013560          | heat shock protein 1                                        | 2.999  | 2.999  | 3.45 |
| A_52_P402127 | Mup9               | NM_001126319       |                                                             | 2.999  | 2.999  | 7.92 |
| A_52_P185079 | Xbp1               | NM_013842          | X-box binding protein 1                                     | 3.001  | 3.001  | 4.44 |
| A_51_P128929 | Alas1              | NM_020559          | aminolevulinic acid synthase 1                              | 3.022  | 3.022  | 9.3  |
| A_52_P129756 | Alas1              | NM_020559          | aminolevulinic acid synthase 1                              | 3.113  | 3.113  | 9.3  |
| A_51_P500044 | Vldlr              | NM_013703          | very low density lipoprotein receptor                       | 3.125  | 3.125  | 4.96 |
| A_51_P450278 | 2010003K11Rik      | NM_027237          | RIKEN cDNA 2010003K11 gene                                  | 3.131  | 3.131  | 6.58 |
| A_52_P412506 | Mup5               | NM_008649          | major urinary protein 5                                     | 3.186  | 3.186  | 4.96 |
| A_52_P559066 | Aim1l              | NM_001162970       | absent in melanoma 1-like                                   | 3.237  | 3.237  | 3.43 |
| A_52_P382149 | Cyp26a1            | NM_007811          | cytochrome P450, family 26, subfamily a, polypeptide 1      | 3.295  | 3.295  | 6.58 |
| A_52_P549184 | Gpr64              | NM_178712          | G protein-coupled receptor 64                               | 3.3    | 3.3    | 2.56 |
| A_52_P379337 | Rtn4               | NM_194054          | reticulon 4                                                 | 3.303  | 3.303  | 2.56 |
| A_51_P164835 | Ppl                | NM_008909          | periplakin                                                  | 3.313  | 3.313  | 3.45 |
| A_51_P262766 | Ccnd1              | S78355             | cyclin D1                                                   | 3.521  | 3.521  | 4.44 |
| A_51_P160870 | Rtn4               | NM_194054          | reticulon 4                                                 | 3.536  | 3.536  | 3.43 |
| A_51_P262766 | Ccnd1              | S78355             | cyclin D1                                                   | 3.543  | 3.543  | 4.44 |
| A_51_P262766 | Ccnd1              | S78355             | cyclin D1                                                   | 3.546  | 3.546  | 4.44 |
| A_51_P262766 | Ccnd1              | S78355             | cyclin D1                                                   | 3.549  | 3.549  | 4.96 |
| A_51_P262766 | Ccnd1              | S78355             | cyclin D1                                                   | 3.574  | 3.574  | 4.96 |
| A_51_P262766 | Ccnd1              | S78355             | cyclin D1                                                   | 3.575  | 3.575  | 4.96 |
| A_51_P278334 | Vldlr              | NM_013703          | very low density lipoprotein receptor                       | 3.577  | 3.577  | 4.96 |
| A_51_P262766 | Ccnd1              | S78355             | cyclin D1                                                   | 3.58   | 3.58   | 4.44 |
| A_51_P262766 | Ccnd1              | S78355             | cyclin D1                                                   | 3.625  | 3.625  | 4.44 |
| A_51_P262766 | Ccnd1              | S78355             | cyclin D1                                                   | 3.63   | 3.63   | 4.96 |
| A_52_P387467 | Mup6               | NM_001081285       | novel member of the major urinary protein (Mup) gene family | 3.651  | 3.651  | 4.2  |
| A_51_P262766 | Ccnd1              | S78355             | cyclin D1                                                   | 3.703  | 3.703  | 4.44 |
| A_51_P268529 | Csad               | NM_144942          | cysteine sulfinic acid decarboxylase                        | 3.854  | 3.854  | 9.3  |
| A_52_P328440 | ENSMUST00000098050 | ENSMUST00000098050 |                                                             | 3.993  | 3.993  | 4.96 |
| A_51_P490456 | Cidec              | NM_178373          | cell death-inducing DFFA-like effector c                    | 4.124  | 4.124  | 7.92 |
| A_52_P231729 | H2-Q1              | NM_010390          | histocompatibility 2, Q region locus 1                      | 4.531  | 4.531  | 2.56 |
| A_52_P251690 | Gvin1              | NM_029000          | GTPase, very large interferon inducible 1                   | 4.611  | 4.611  | 5.56 |
| A_52_P661713 | Gvin1              | NM_029000          | GTPase, very large interferon inducible 1                   | 4.774  | 4.774  | 5.56 |
| A_51_P327496 | A_51_P327496       | A_51_P327496       |                                                             | 6.54   | 6.54   | 1.97 |
| A_51_P129464 | Scd2               | NM_009128          | stearoyl-Coenzyme A desaturase 2                            | 7.003  | 7.003  | 3.45 |
| A_51_P327491 | Apoa4              | NM_007468          | apolipoprotein A-IV                                         | 7.632  | 7.632  | 1.97 |
| A_51_P424532 | Vnn1               | NM_011704          | vanin 1                                                     | 9.535  | 9.535  | 2.56 |
| A_51_P299527 | ENSMUST00000120522 | ENSMUST00000120522 | cDNA sequence BC014805                                      | 9.957  | 9.957  | 0    |
| A_52_P289091 | Cyp2b13            | NM_007813          | cytochrome P450, family 2, subfamily b, polypeptide 13      | 10.262 | 10.262 | 0    |
| A_52_P460393 | BC014805           | NM_146232          | cDNA sequence BC014805                                      | 11.432 | 11.432 | 0    |
| A_51_P358445 | Dnase1             | NM_010061          | deoxyribonuclease I                                         | 16.044 | 16.044 | 0    |
